# Supplementary material
Source: PubMed Central journal article supplement (PMC3023179)

Electronic Supporting Information

## **Total Synthesis and Structural Revision of Biyouyanagin B**

K. C. Nicolaou,\* Silvano Sanchini, T. Robert Wu, and David Sarlah

*Contribution from the Department of Chemistry and The Skaggs Institute for Chemical Biology, The Scripps Research Institute, 10550 N. Torrey Pines Road, La Jolla, CA 92037 (USA), and Department of Chemistry and Biochemistry, University of California, San Diego, 9500 Gilman Drive, La Jolla, CA 92093 (USA)*

*E-mail: [kcn@scripps.edu](mailto:kcn@scripps.edu)*

- I. Experimental Procedures and Spectroscopic Data for Compounds**
- II. References**
- III.  $^1\text{H}$ ,  $^{13}\text{C}$ ,  $^1\text{H}$  -  $^1\text{H}$  COSY, HMQC, HMBC and ROESY NMR Spectra of Compounds**

## I. Experimental Procedures and Spectroscopic Data for Compounds

**General Procedures.** All reactions were carried out under an argon atmosphere with dry solvents under anhydrous conditions, unless otherwise noted. Dry tetrahydrofuran (THF), toluene, benzene, diethyl ether (Et<sub>2</sub>O) and methylene chloride (CH<sub>2</sub>Cl<sub>2</sub>) were obtained by passing commercially available pre-dried, oxygen-free formulations through activated alumina columns. Yields refer to chromatographically and spectroscopically (<sup>1</sup>H NMR) homogeneous materials. Reagents were purchased at the highest commercial quality and used without further purification, unless otherwise stated.

Reactions were monitored by thin-layer chromatography (TLC) carried out on 0.25 mm E. Merck silica gel plates (60F-254) using UV light as visualizing agent and an ethanolic solution of phosphomolybdic acid and cerium sulfate, and heat as developing agents. E. Merck silica gel (60, particle size 0.040–0.063 mm) was used for flash column chromatography.

NMR spectra were recorded on Bruker DRX-600 or DRX-500 instruments and calibrated using residual undeuterated solvent as an internal reference. The following abbreviations were used to explain the multiplicities: s = singlet, d = doublet, t = triplet, q = quartet, br = broad.

Infrared (IR) spectra were recorded on a Perkin-Elmer 1600 series FT-IR spectrometer. Melting points are uncorrected and were measured on a Thomas-Hoover Unimelt capillary melting point apparatus. High-resolution mass spectra (HRMS) were recorded on a VG ZAB-ZSE mass spectrometer using MALDI (matrix-assisted laser-desorption ionization) or ESI (electrospray ionization).

**Enone precursor to zingiberene (3')**: To a mixture of (*R*)-2-(methoxydiphenylmethyl)pyrrolidine

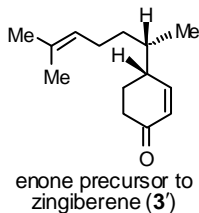

(267 mg, 1.0 mmol, 5 mol%) and ethyl 3,4-dihydroxy benzoate (729 mg, 4.0 mmol, 20 mol%) at 0 °C was added a pre-cooled mixture of *S*-citronellal (3.09 g, 20.0 mmol) and methyl vinyl ketone (2.10 g, 30.0 mmol, 1.5 equiv). The resulting homogeneous solution was stirred at 4 °C for 48 h and the reaction mixture was

directly subjected to flash column chromatography (silica gel, ether/hexanes, 1:5) to give the corresponding keto-aldehyde as colorless oil (3.59 g, 16.0 mmol, 80%, ca 10:1 dr). After dissolving the resulting keto-aldehyde (2.24 g, 10.0 mmol) in *i*Pr-O H (33 mL) was added LiOH × H<sub>2</sub>O (0.042 g, 1.0 mmol) and the mixture was stirred for 24 h. The mixture was then extracted with Et<sub>2</sub>O (3 × 100 mL), and the combined organic phase was washed with brine (100 mL), dried with Na<sub>2</sub>SO<sub>4</sub> and concentrated in vacuo. The residue so-obtained was subjected to flash column chromatography (silica gel, EtOAc:hexanes, 1:12) to give the title compound (1.75 g, 8.50 mmol, 81%, ca 10:1 dr).

**3'**:  $R_f = 0.62$  (silica gel, EtOAc:hexanes 1:2);  $[\alpha]_D^{25} = -38.3$  ( $c = 0.80$ , CHCl<sub>3</sub>); IR  $\nu_{\max}$  (film): 3017, 2961, 2925, 2873, 2858, 1683, 1451, 1381, 755 cm<sup>-1</sup>; <sup>1</sup>H NMR (600 MHz, CDCl<sub>3</sub>)  $\delta = 6.83$  (dt,  $J = 10.2, 1.9$  Hz, 1 H), 6.01 (dd,  $J = 10.2, 2.5$  Hz, 1 H), 5.09 (m, 1 H), 2.50 (dt,  $J = 16.6, 3.9$  Hz, 1 H), 2.43 (m, 1 H), 2.33 (m, 1 H), 2.05 (td,  $J = 14.7, 6.8$  Hz, 1 H), 1.95 (m, 2 H), 1.77 (ddd,  $J = 13.6, 8.9, 3.5$  Hz, 1 H), 1.69 (s, 3 H), 1.61 (s, 3 H), 1.41 (m, 1 H), 1.23 (m, 1 H), 0.89 (d,  $J = 6.9$  Hz, 3 H) ppm; <sup>13</sup>C NMR (150 MHz, CDCl<sub>3</sub>)  $\delta = 200.17, 155.46, 131.80, 129.65, 124.09, 41.03, 37.49, 36.09, 34.09, 25.82, 25.69, 23.94, 17.67, 15.97$  ppm; HRMS (ESI-TOF):  $m/z$  calcd for C<sub>14</sub>H<sub>23</sub>O (M+H<sup>+</sup>): 207.1671; found 207.1745.

**Enone precursor to 7-*epi*-zingiberene (7')**: The same procedure for the preparation of the enone

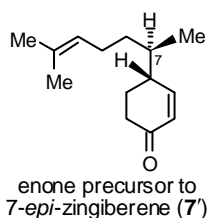

precursor of zingiberene (**3**) was followed using *R*-citronellal (2.24 g, 10.0 mmol) as starting material. The title compound was obtained as a colorless oil (1.73 g, 8.40 mmol, 78%, ca 8:1 dr). **7'**:  $R_f = 0.60$  (silica gel, EtOAc:hexanes 1:2);  $[\alpha]_D^{25} = -53.6$  ( $c = 1.00$ , CHCl<sub>3</sub>); IR  $\nu_{\max}$  (film): 3029, 2962, 2926, 2873,

2858, 1683  $\text{cm}^{-1}$ ;  $^1\text{H}$  NMR (600 MHz,  $\text{CDCl}_3$ )  $\delta$  = 6.87 (d,  $J$  = 10.3 Hz, 1 H), 6.02 (dd,  $J$  = 10.3, 2.7 Hz, 1 H), 5.08 (t,  $J$  = 6.5 Hz, 1 H), 2.50 (dt,  $J$  = 16.6, 3.9 Hz, 1 H), 2.42 (m, 1 H), 2.34 (m, 1 H), 2.06 (td,  $J$  = 14.4, 6.6 Hz, 1 H), 1.95 (m, 2 H), 1.80 (m, 1 H), 1.68 (s, 3 H), 1.60 (s, 3 H), 1.39 (m, 1 H), 1.25 (m, 1 H), 0.93 (d,  $J$  = 6.8 Hz, 3 H) ppm;  $^{13}\text{C}$  NMR (150 MHz,  $\text{CDCl}_3$ )  $\delta$  = 200.15, 154.36, 131.82, 129.91, 124.12, 41.60, 37.68, 36.03, 33.88, 25.82, 25.78, 25.69, 17.67, 16.50 ppm; HRMS (ESI-TOF):  $m/z$  calcd for  $\text{C}_{14}\text{H}_{23}\text{O}$  ( $\text{M}+\text{H}^+$ ): 207.1671; found 207.1748.

**Enone precursor to racemic zingiberene (3', *ent*-3', 7', *ent*-7')** (equimolar mixture of all four

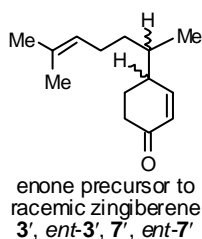

possible isomers): This compound was prepared from the piperidine enamine of racemic citronellal following the procedure reported by Croft et al.<sup>[1]</sup>

Spectroscopic data are in accord to those reported in the literature.<sup>[1]</sup>

**Zingiberene (3):** To a stirring solution of its precursor enone (2.20 g, 10.7 mmol) and Comins

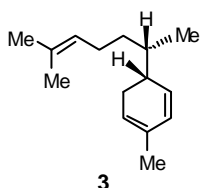

reagent (6.32 g, 18.2 mmol, 1.7 equiv) in THF (200 mL) at  $-78$   $^{\circ}\text{C}$  was added KHMDS (0.5 M in toluene, 32.1 mL, 16.1 mmol, 1.5 equiv). The resulting orange solution was stirred at  $-78$   $^{\circ}\text{C}$  for 0.5 h. Upon completion (TLC analysis), the

reaction was quenched at  $-78$   $^{\circ}\text{C}$  with saturated aqueous  $\text{NaHCO}_3$  solution (100 mL) and, upon warming to ambient temperature, was extracted with  $\text{Et}_2\text{O}$  ( $3 \times 100$  mL). The combined organic phases were washed with brine (30 mL), dried with  $\text{Na}_2\text{SO}_4$ , and concentrated in vacuo. The residue was dissolved in  $\text{CH}_2\text{Cl}_2$  (30 mL) and passed through a short silica gel pad. After concentration, the resulting crude triflate was dissolved in THF (80 mL). To this solution at  $0$   $^{\circ}\text{C}$  was added  $\text{CuI}$  (95 mg, 0.50 mmol, 5 mol%) and then  $\text{MeMgBr}$  (3.0 M in ether, 5.0 mL, 15.0 mmol, 1.5 equiv) in the dark. After stirring at  $0$   $^{\circ}\text{C}$  for 30 min, the reaction was quenched with saturated aqueous  $\text{NH}_4\text{Cl}$  solution (50 mL) and extracted with ether ( $3 \times 50$  mL). The combined organic phases were washed with brine (100 mL), dried with  $\text{Na}_2\text{SO}_4$  and carefully concentrated in vacuo. The residue was subjected to flash column chromatography (silica gel, pentane) to give the

title compound (1.75 g, 8.56 mmol, 91% for the two steps). This compound is rather labile at room temperature and was used immediately. **3**:  $R_f = 0.39$  (hexanes);  $[\alpha]_D^{25} = -111.3$  ( $c = 0.70$ ,  $\text{CHCl}_3$ ); IR  $\nu_{\text{max}}$  (film): 3020, 2996, 2917, 2859, 2858, 1215, 754  $\text{cm}^{-1}$ ;  $^1\text{H}$  NMR (600 MHz,  $\text{CDCl}_3$ )  $\delta = 5.77$  (d,  $J = 9.7$  Hz, 1 H), 5.64 (dd,  $J = 9.7, 2.9$  Hz, 1 H), 5.45 (s, 1 H), 5.10 (t,  $J = 7.1$  Hz, 1 H), 2.27 (m, 1 H), 2.03 (m, 3 H), 1.93 (m, 1 H), 1.72 (d,  $J = 1.1$  Hz, 3 H), 1.69 (s, 3 H), 1.61 (s, 3 H), 1.56 (m, 1 H), 1.41 (ddd,  $J = 15.0, 11.2, 5.9$  Hz, 1 H), 1.18 (m, 1 H), 0.87 (d,  $J = 6.8$  Hz, 3 H) ppm;  $^{13}\text{C}$  NMR (150 MHz,  $\text{CDCl}_3$ )  $\delta = 131.21, 131.06, 127.84, 124.80, 120.38, 38.01, 35.99, 34.23, 25.92, 25.71, 24.38, 21.10, 17.65, 16.54$  ppm; HRMS (ESI-TOF):  $m/z$  calcd for  $\text{C}_{15}\text{H}_{25}$  ( $\text{M}+\text{H}^+$ ): 205.1878; found 205.1951.

**7-*epi*-zingiberene (7')**: The same procedure for the preparation of zingiberene (**3**) was followed

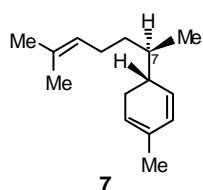

using the appropriate enone (2.24 g, 10.0 mmol) as starting material. The title compound was obtained as colorless oil (1.73 g, 8.40 mmol, 78%). **7'**:  $R_f = 0.60$  (silica gel, EtOAc:hexanes 1:2);  $[\alpha]_D^{25} = -101.9$  ( $c = 0.71$ ,  $\text{CHCl}_3$ ); IR  $\nu_{\text{max}}$

(film): 3025, 2996, 2917, 2859, 2823, 759  $\text{cm}^{-1}$ ;  $^1\text{H}$  NMR (600 MHz,  $\text{CDCl}_3$ )  $\delta = 5.79$  (dd,  $J = 9.7, 1.5$  Hz, 1 H), 5.67 (dd,  $J = 9.8, 3.0$  Hz, 1 H), 5.46 (d,  $J = 0.8$  Hz, 1 H), 5.11 (m, 1 H), 2.26 (m, 1 H), 2.06 (m, 1 H), 1.93 (m, 1 H), 1.72 (d,  $J = 1.7$  Hz, 1 H), 1.69 (d,  $J = 0.5$  Hz, 1 H), 1.61 (s, 1 H), 1.50 (m, 1 H), 1.42 (m, 1 H), 1.18 (m, 1 H), 0.89 (d,  $J = 6.8$  Hz, 1 H) ppm;  $^{13}\text{C}$  NMR (150 MHz,  $\text{CDCl}_3$ )  $\delta = 131.21, 131.08, 129.71, 128.19, 124.83, 120.57, 38.37, 36.00, 34.12, 26.33, 25.89, 25.71, 21.09, 17.65, 16.70$  ppm; HRMS (ESI-TOF):  $m/z$  calcd for  $\text{C}_{15}\text{H}_{25}$  ( $\text{M}+\text{H}^+$ ): 205.1878; found 205.1951.

**Racemic zingiberene**: The same procedure for the preparation of zingiberene (**3**) was followed

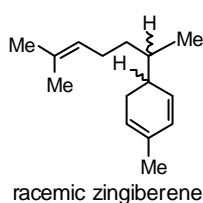

using the appropriate enone<sup>[1]</sup> (2.24 g, 10.0 mmol) as starting material. Spectroscopic data are in accord to those reported in literature.<sup>[2]</sup>

**Biyouyanagin 6:** Obtained from 4-*epi*-hyperolactone C (**5**)<sup>[31]</sup> and zingiberene (**3**) in 52% yield. **6:**

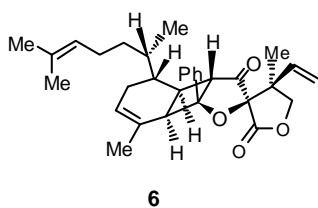

$R_f = 0.28$  (silica gel, pure benzene);  $[\alpha]_D^{25} = +153.0$  ( $c = 0.50$ ,  $\text{CHCl}_3$ );

IR  $\nu_{\text{max}}$  (film): 2966, 2922, 2857, 1792, 1742, 1108, 756, 700  $\text{cm}^{-1}$ ;  $^1\text{H}$

NMR (600 MHz,  $\text{CDCl}_3$ )  $\delta = 7.32$  (m, 5 H), 5.96 (dd,  $J = 17.5, 10.9$  Hz,

1 H), 5.48 (m, 1 H), 5.30 (d,  $J = 10.9$  Hz, 1 H), 5.11 (m, 1 H), 5.11 (d,  $J = 17.5$  Hz, 1 H), 4.48 (d,  $J$

$= 8.8$  Hz, 1 H), 4.19 (d,  $J = 8.8$  Hz, 1 H), 3.44 (d,  $J = 8.4$  Hz, 1 H), 3.20 (dd,  $J = 6.2, 1.2$  Hz, 1 H),

3.09 (m, 1 H), 2.15 (m, 1 H), 2.04 (m, 1 H), 2.01 (m, 1 H), 1.91 (m, 1 H), 1.73 (m, 1 H), 1.68 (s, 3

H), 1.60 (s, 3 H), 1.43 (m, 2 H), 1.18 (m, 1 H), 0.96 (s, 3 H), 0.82 (d,  $J = 6.8$  Hz, 3 H), 0.67 (s, 3 H)

ppm; NMR (150 MHz,  $\text{CDCl}_3$ )  $\delta = 209.85, 171.62, 139.29, 137.59, 131.49, 131.37, 127.81,$

$127.71, 125.96, 124.52, 123.76, 115.55, 92.28, 89.35, 72.97, 52.60, 50.32, 48.74, 38.68, 36.12,$

$35.18, 34.92, 25.82, 25.68, 23.47, 21.59, 17.65, 16.83, 15.26$  ppm; HRMS (ESI-TOF):  $m/z$  calcd for

$\text{C}_{31}\text{H}_{39}\text{O}_4$  ( $\text{M} + \text{H}^+$ ): 475.2843; found 475.2844.

**Biyouyanagin 8:** Obtained from 4-*epi*-hyperolactone C (**5**)<sup>[31]</sup> and 7-*epi*-zingiberene (**7**) in 37%

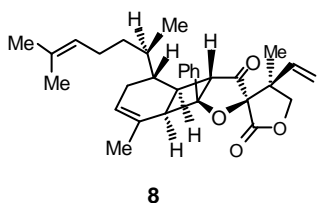

yield. **8:**  $R_f = 0.29$  (silica gel, pure benzene);  $[\alpha]_D^{25} = +214.4$  ( $c = 0.13,$

$\text{CHCl}_3$ ); IR  $\nu_{\text{max}}$  (film): 2964, 2926, 1793, 1742, 1108, 700  $\text{cm}^{-1}$ ;  $^1\text{H}$

NMR (600 MHz,  $\text{CDCl}_3$ )  $\delta = 7.31$  (m, 5 H), 5.96 (dd,  $J = 17.5, 10.9$  Hz,

1 H), 5.48 (m, 1 H), 5.31 (d,  $J = 10.9$  Hz, 1 H), 5.11 (d,  $J = 17.5$  Hz, 1 H), 5.07 (m, 1 H), 4.49 (d,  $J$

$= 8.9$  Hz, 1 H), 4.20 (d,  $J = 8.9$  Hz, 1 H), 3.41 (d,  $J = 8.3$  Hz, 1 H), 3.23 (d,  $J = 6.4$  Hz, 1 H), 3.18

(m, 1 H), 2.23 (m, 1 H), 2.05 (m, 1 H), 2.00 (m, 1 H), 1.87 (m, 1 H), 1.69 (m, 1 H), 1.68 (s, 3 H),

1.59 (s, 3 H), 1.41 (m, 1 H), 1.37 (m, 1 H), 1.15 (m, 1 H), 0.95 (s, 3 H), 0.90 (d,  $J = 6.8$  Hz, 3 H),

0.66 (s, 3 H) ppm;  $^{13}\text{C}$  NMR (150 MHz,  $\text{CDCl}_3$ )  $\delta = 209.84, 171.69, 139.29, 137.60, 131.50,$

$131.39, 127.85, 127.74, 126.00, 124.61, 123.58, 115.59, 92.33, 89.32, 73.00, 52.38, 50.14, 48.75,$

$38.76, 35.48, 35.01, 34.67, 25.71, 25.52, 25.22, 21.68, 17.66, 17.25, 15.26$  ppm; HRMS (ESI-

TOF):  $m/z$  calcd for  $\text{C}_{31}\text{H}_{39}\text{O}_4$  ( $\text{M} + \text{H}^+$ ): 475.2843; found 475.2849.

**Biyouyanagin 9:** Obtained from 4-*epi*-hyperolactone C (**5**)<sup>[3]</sup> and *ent*-7-*epi*-zingiberene (*ent*-**7**)<sup>[4]</sup> in

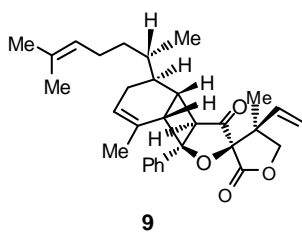

**9**

39% yield. **9:**  $R_f = 0.38$  (silica gel, pure benzene);  $[\alpha]_D^{25} = +241.8$  ( $c = 0.17$ ,  $\text{CHCl}_3$ ); IR  $\nu_{\text{max}}$  (film): 3022, 2968, 2917, 1791, 1741, 1215, 1107, 755, 701, 669  $\text{cm}^{-1}$ ; NMR (600 MHz,  $\text{CDCl}_3$ )  $\delta = 7.29$  (m, 5 H), 5.92 (dd,  $J = 17.5, 10.9$  Hz, 1 H), 5.55 (d,  $J = 6.7$  Hz, 1 H), 5.28 (d,  $J = 10.9$  Hz, 1

H), 5.11 (m, 1 H), 5.05 (d,  $J = 17.5$  Hz, 1 H), 4.46 (d,  $J = 8.8$  Hz, 1 H), 4.16 (d,  $J = 8.8$  Hz, 1 H), 3.64 (m, 1 H), 3.35 (m, 2 H), 2.33 (m, 1 H), 2.02 (m, 1 H), 1.92 (m, 1 H), 1.85 (m, 1 H), 1.70 (s, 3 H), 1.61 (s, 3 H), 1.50 (m, 1 H), 1.43 (m, 1 H), 1.35 (m, 1 H), 1.19 (m, 1 H), 0.93 (s, 3 H), 0.87 (d,  $J = 6.6$  Hz, 3 H), 0.54 (s, 3 H) ppm; NMR (150 MHz,  $\text{CDCl}_3$ )  $\delta = 209.70, 171.54, 138.99, 137.59, 131.61, 131.35, 127.99, 127.65, 126.28, 124.71, 124.64, 115.52, 92.54, 89.27, 72.97, 50.98, 48.63, 47.24, 37.83, 35.16, 34.21, 33.79, 26.01, 25.74, 24.72, 22.09, 17.68, 17.01, 15.18$  ppm; HRMS (ESI-TOF):  $m/z$  calcd for  $\text{C}_{31}\text{H}_{39}\text{O}_4$  ( $\text{M}+\text{H}^+$ ): 475.2843; found 475.2846.

**Biyouyanagin 10:** Obtained from 4-*epi*-hyperolactone C (**5**)<sup>[3]</sup> and *ent*-zingiberene (*ent*-**3**)<sup>[4]</sup> in 44%

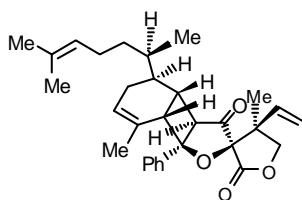

**10**

yield. **10:**  $R_f = 0.37$  (silica gel, pure benzene);  $[\alpha]_D^{25} = +65.7$  ( $c = 0.21$ ,  $\text{CHCl}_3$ ); IR  $\nu_{\text{max}}$  (film): 2964, 2921, 2852, 1793, 1741, 1148, 1379, 1106, 1018, 700  $\text{cm}^{-1}$ ;  $^1\text{H}$  NMR (600 MHz,  $\text{CDCl}_3$ )  $\delta = 7.29$  (m, 5 H), 5.92 (dd,  $J = 17.5, 10.9$  Hz, 1 H), 5.56 (d,  $J = 6.8$  Hz, 1 H), 5.28 (d,  $J = 10.9$  Hz, 1

H), 5.09 (m, 1 H), 5.05 (d,  $J = 17.5$  Hz, 1 H), 4.46 (d,  $J = 8.8$  Hz, 1 H), 4.16 (d,  $J = 8.8$  Hz, 1 H), 3.63 (m, 1 H), 3.34 (m, 2 H), 2.28 (m, 2 H), 1.92 (m, 2 H), 1.69 (s, 3 H), 1.60 (s, 3 H), 1.42 (m, 2 H), 1.35 (m, 1 H), 1.05 (m, 1 H), 0.95 (d,  $J = 6.7$  Hz, 3 H), 0.93 (s, 3 H), 0.53 (s, 3 H) ppm;  $^{13}\text{C}$  NMR (150 MHz,  $\text{CDCl}_3$ )  $\delta = 209.48, 171.48, 139.01, 137.62, 131.64, 131.34, 127.98, 127.64, 126.28, 124.75, 124.47, 115.49, 92.51, 89.27, 72.92, 51.08, 48.63, 47.35, 37.82, 35.61, 34.25, 34.17, 25.71, 25.37, 25.04, 22.09, 17.49, 16.42, 15.16$  ppm; HRMS (ESI-TOF):  $m/z$  calcd for  $\text{C}_{31}\text{H}_{39}\text{O}_4$  ( $\text{M}+\text{H}^+$ ): 475.2843; found 475.2833

**Biyouyanagin 11:** Obtained from hyperolactone C (**4**)<sup>[4]</sup> and zingiberene (**3**)<sup>[4]</sup> in 54% yield. **11:**  $R_f$

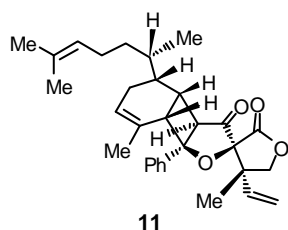

= 0.33 (silica gel, pure benzene);  $[\alpha]_D^{25} = -199.2$  ( $c = 0.60$ ,  $\text{CHCl}_3$ ); IR  $\nu_{\text{max}}$  (film): 3020, 2926, 2855, 1791, 1741, 1215, 1104, 754, 668  $\text{cm}^{-1}$ ;  $^1\text{H}$  NMR (600 MHz,  $\text{CDCl}_3$ )  $\delta = 7.28$  (m, 3 H), 7.24 (m, 2 H), 5.52 (d,  $J = 6.9$  Hz, 1 H), 5.08 (m, 1 H), 5.06 (dd,  $J = 17.6, 10.9$  Hz, 1 H), 4.68 (d,  $J = 8.7$

Hz, 1 H), 4.66 (d,  $J = 11.0$  Hz, 1 H), 4.46 (d,  $J = 17.6$  Hz, 1 H), 3.93 (d,  $J = 8.6$  Hz, 1 H), 3.57 (m, 1 H), 3.36 (d,  $J = 7.8$  Hz, 1 H), 3.32 (d,  $J = 7.4$  Hz, 1 H), 2.25 (m, 1 H), 1.98 (m, 1 H), 1.89 (m, 1 H), 1.81 (m, 1 H), 1.69 (s, 3 H), 1.60 (s, 3 H), 1.41 (m, 2 H), 1.34 (m, 1 H), 1.25 (s, 3 H), 1.04 (m, 1 H), 0.95 (s, 3 H), 0.93 (d,  $J = 6.7$  Hz, 3 H) ppm;  $^{13}\text{C}$  NMR (150 MHz,  $\text{CDCl}_3$ )  $\delta = 209.11, 171.44, 139.39, 134.25, 131.63, 131.31, 127.86, 127.61, 126.11, 124.71, 124.50, 118.18, 93.27, 89.50, 73.58, 50.90, 48.89, 46.54, 37.82, 35.40, 34.26, 34.11, 25.71, 25.32, 25.04, 22.17, 20.03, 17.50, 16.41$  ppm; HRMS (ESI-TOF):  $m/z$  calcd for  $\text{C}_{31}\text{H}_{39}\text{O}_4$  ( $\text{M}+\text{H}^+$ ): 475.2843; found 475.2837.

**Biyouyanagin 12:** Obtained from hyperolactone C (**4**)<sup>[4]</sup> and zingiberene (**3**)<sup>[4]</sup> in 4% yield. **12:**  $R_f =$

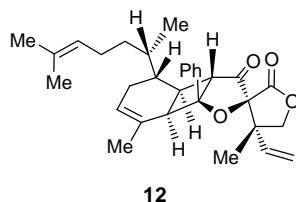

0.27 (silica gel, pure benzene);  $[\alpha]_D^{25} = -6.1$  ( $c = 0.65$ ,  $\text{CHCl}_3$ ); IR  $\nu_{\text{max}}$  (film): 2954, 2929, 2857, 1795, 1742, 1215, 1100, 835  $\text{cm}^{-1}$ ;  $^1\text{H}$  NMR (600 MHz,  $\text{CDCl}_3$ )  $\delta = 7.40$  (m, 5 H), 6.10 (dd,  $J = 17.5, 10.8$  Hz, 1 H),

5.50 (m, 1 H), 5.44 (m, 2 H), 5.08 (m, 1 H), 4.75 (d,  $J = 8.7$  Hz, 1 H), 4.00 (d,  $J = 8.7$  Hz, 1 H), 3.12 (dd,  $J = 5.6, 1.1$  Hz, 1 H), 2.99 (d,  $J = 8.9$  Hz, 1 H), 2.78 (m, 1 H), 2.13 (m, 1 H), 2.03 (m, 1 H), 1.94 (m, 2 H), 1.71 (m, 1 H), 1.69 (s, 3 H), 1.60 (s, 3 H), 1.50 (s, 3 H), 1.41 (m, 2 H), 1.17 (m, 1 H), 1.00 (s, 3 H), 0.84 (d,  $J = 6.7$  Hz, 3 H) ppm;  $^{13}\text{C}$  NMR (150 MHz,  $\text{CDCl}_3$ )  $\delta = 209.67, 171.14, 139.12, 135.88, 131.55, 131.47, 127.50, 127.46, 125.83, 124.46, 123.86, 119.43, 92.74, 88.69, 74.07, 53.55, 51.21, 48.84, 39.30, 34.87, 34.48, 33.26, 29.70, 25.83, 25.72, 23.83, 21.45, 18.92, 17.74, 16.63$  ppm; HRMS (ESI-TOF):  $m/z$  calcd for  $\text{C}_{31}\text{H}_{39}\text{O}_4$  ( $\text{M}+\text{H}^+$ ): 475.2843; found 475.2851.

**Biyouyanagin 13:** Obtained from hyperolactone C (**4**)<sup>[4]</sup> and 7-*epi*-zingiberene (**7**) in 37% yield.

**13:**  $R_f = 0.32$  (silica gel, pure benzene);  $[\alpha]_D^{25} = -115.0$  ( $c = 0.1$ ,  $\text{CHCl}_3$ ); IR  $\nu_{\text{max}}$  (film): 3020,



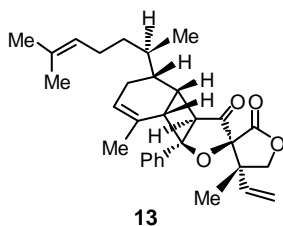

2927, 2857, 1789, 1743, 1215, 1214, 753  $\text{cm}^{-1}$ ;  $^1\text{H}$  NMR (600 MHz,  $\text{CDCl}_3$ )  $\delta$  = 7.27 (m, 5 H), 5.52 (d,  $J$  = 6.8 Hz, 1 H), 5.10 (m, 1 H), 5.06 (dd,  $J$  = 17.6, 10.9 Hz, 1 H), 4.67 (m, 2 H), 4.46 (d,  $J$  = 17.6 Hz, 1 H), 3.93 (d,  $J$  = 8.6 Hz, 1 H), 3.58 (m, 1 H), 3.37 (d,  $J$  = 7.8 Hz, 1 H), 3.31 (d,  $J$  = 7.4 Hz, 1 H), 2.30 (m, 1 H), 2.01 (m, 1 H), 1.90 (m, 1 H), 1.81 (m, 1 H), 1.69 (s, 3 H), 1.61 (s, 3 H), 1.49 (s, 1 H), 1.42 (s, 1 H), 1.33 (s, 1 H), 1.25 (s, 3 H), 1.17 (s, 1 H), 0.96 (s, 3 H), 0.86 (d,  $J$  = 6.6 Hz, 3 H) ppm;  $^{13}\text{C}$  NMR (150 MHz,  $\text{CDCl}_3$ )  $\delta$  = 209.34, 171.52, 139.37, 134.24, 131.61, 131.34, 127.62, 126.12, 124.72, 124.61, 118.21, 93.31, 89.52, 73.63, 50.81, 48.89, 46.43, 37.86, 34.93, 34.15, 33.80, 29.70, 25.97, 25.74, 24.72, 22.18, 20.04, 17.68, 16.99 ppm; HRMS (ESI-TOF):  $m/z$  calcd for  $\text{C}_{31}\text{H}_{39}\text{O}_4$  ( $\text{M}+\text{H}^+$ ): 475.2843; found 475.2853.

**Biyouyanagin 14:** Obtained from hyperolactone C (**4**)<sup>[4]</sup> and 7-*epi*-zingiberene (**7**) in 19% yield.

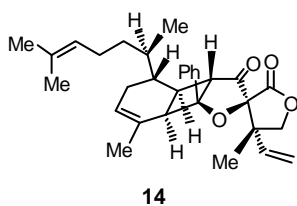

**14:**  $R_f$  = 0.26 (silica gel, pure benzene);  $[\alpha]_{\text{D}}^{25}$  = +15.6 ( $c$  = 0.08,  $\text{CHCl}_3$ ); IR  $\nu_{\text{max}}$  (film): 3020, 2926, 2855, 1791, 1741, 1215, 1104, 754, 668  $\text{cm}^{-1}$ ; NMR (600 MHz,  $\text{CDCl}_3$ )  $\delta$  = 7.36 (m, 5 H), 6.10 (dd,  $J$  = 17.5, 10.8 Hz, 1 H), 5.50 (m, 1 H), 5.46 (d,  $J$  = 17.5 Hz, 1 H), 5.43 (d,  $J$  = 11.2 Hz, 1 H), 5.08 (m, 1 H), 4.74 (d,  $J$  = 8.7 Hz, 1 H), 4.00 (d,  $J$  = 8.7 Hz, 1 H), 3.15 (d,  $J$  = 5.8 Hz, 1 H), 2.97 (d,  $J$  = 8.9 Hz, 1 H), 2.84 (m, 1 H), 2.23 (m, 1 H), 2.02 (m, 1 H), 1.92 (m, 2 H), 1.71 (m, 1 H), 1.69 (s, 3 H), 1.61 (s, 3 H), 1.50 (s, 3 H), 1.41 (m, 1 H), 1.37 (m, 1 H), 1.16 (m, 1 H), 0.97 (s, 3 H), 0.88 (d,  $J$  = 6.8 Hz, 3 H) ppm;  $^{13}\text{C}$  NMR (150 MHz,  $\text{CDCl}_3$ )  $\delta$  = 209.60, 171.12, 139.11, 135.95, 131.55, 131.39, 127.46, 125.82, 124.48, 123.84, 119.41, 92.78, 88.60, 74.07, 53.39, 51.06, 48.86, 39.29, 35.80, 34.64, 32.52, 29.70, 25.72, 25.53, 25.50, 21.49, 18.88, 17.70, 17.30 ppm; HRMS (ESI-TOF):  $m/z$  calcd for  $\text{C}_{31}\text{H}_{39}\text{O}_4$  ( $\text{M}+\text{H}^+$ ): 475.2843; found 475.2839.

**Biyouyanagin B (2):** Obtained from hyperolactone C (**4**)<sup>[4]</sup> and *ent*-zingiberene (*ent*-**3**)<sup>[4]</sup> in 3% yield. **2:**  $R_f$  = 0.26 (silica gel, pure benzene); mp 125–126  $^{\circ}\text{C}$ ,  $\text{CH}_2\text{Cl}_2$ /hexanes;  $[\alpha]_{\text{D}}^{25}$  = -1.8 ( $c$  = 0.33,  $\text{CHCl}_3$ ); {lit.,  $[\alpha]_{\text{D}}^{25}$  = -5.9 ( $c$  = 0.20,  $\text{CHCl}_3$ )}; IR  $\nu_{\text{max}}$  (film): 3021, 2970, 2915, 1792, 1741,

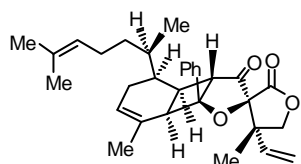

**2:** biyouyanagin B

1216, 1101, 756  $\text{cm}^{-1}$ ;  $^1\text{H}$  NMR (600 MHz,  $\text{CDCl}_3$ )  $\delta$  = 7.26 (m, 5 H), 6.07 (dd,  $J$  = 17.5, 10.8 Hz, 1 H), 5.57 (d,  $J$  = 6.9 Hz, 1 H), 5.44 (d,  $J$  = 17.5 Hz, 1 H), 5.38 (d,  $J$  = 10.8 Hz, 1 H), 5.11 (t,  $J$  = 7.0 Hz, 1 H), 4.72 (d,  $J$  = 8.7 Hz, 1 H), 3.97 (d,  $J$  = 8.7 Hz, 1 H), 3.29 (m, 2 H), 3.03 (d,  $J$  = 7.4 Hz, 1 H), 2.29 (m, 1 H), 2.01 (m, 1 H), 1.94 (m, 1 H), 1.83 (m, 1 H), 1.70 (s, 3 H), 1.64 (s, 3 H), 1.51 (s, 3 H), 1.47 (m, 2 H), 1.27 (m, 1 H), 1.08 (m, 1 H), 0.96 (d,  $J$  = 6.7 Hz, 3 H), 0.92 (s, 3 H) ppm;  $^{13}\text{C}$  NMR (150 MHz,  $\text{CDCl}_3$ )  $\delta$  = 209.39, 170.92, 138.72, 136.22, 131.77, 131.20, 127.40, 127.13, 126.06, 124.77, 124.66, 119.26, 92.68, 88.60, 74.03, 51.19, 48.83, 47.18, 37.89, 34.37, 33.92, 33.08, 25.74, 25.53, 24.90, 22.23, 18.84, 17.74, 16.65 ppm; HRMS (ESI-TOF):  $m/z$  calcd for  $\text{C}_{31}\text{H}_{39}\text{O}_4$  ( $\text{M}+\text{H}^+$ ): 475.2843; found 475.2834.

**Biyouyanagin C (15):** Obtained from hyperolactone C (**4**)<sup>[4]</sup> and *ent*-zingiberene (*ent*-**3**)<sup>[4]</sup> in 2%

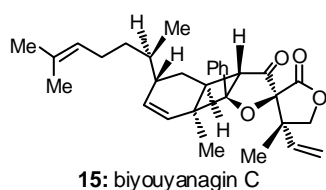

**15:** biyouyanagin C

yield. **15:**  $R_f$  = 0.25 (silica gel, pure benzene);  $[\alpha]_D^{25}$  = +27.6 ( $c$  = 0.50,  $\text{CHCl}_3$ ); IR  $\nu_{\text{max}}$  (film): 3020, 2972, 2921, 2855, 1792, 1741, 1215, 1100, 754  $\text{cm}^{-1}$ ;  $^1\text{H}$  NMR (600 MHz,  $\text{CDCl}_3$ )  $\delta$  = 7.32 (m, 3 H), 7.15 (m, 2 H), 6.07 (dd,  $J$  = 17.5, 10.7 Hz, 1 H), 5.48 (d,  $J$  = 10.5 Hz, 1 H), 5.45 (d,  $J$  = 4.3 Hz, 1 H), 5.43 (d,  $J$  = 1.9 Hz, 1 H), 5.10 (m, 1 H), 4.88 (m, 1 H), 4.69 (d,  $J$  = 8.7 Hz, 1 H), 3.92 (d,  $J$  = 8.7 Hz, 1 H), 3.32 (d,  $J$  = 7.4 Hz, 1 H), 2.87 (m, 1 H), 2.12 (m, 1 H), 2.05 (m, 1 H), 1.94 (m, 1 H), 1.69 (s, 3 H), 1.65 (m, 1 H), 1.62 (s, 3 H), 1.55 (m, 1 H), 1.49 (s, 3 H), 1.38 (m, 1 H), 1.26 (s, 3 H), 1.28 (m, 1 H), 1.19 (m, 1 H), 0.83 (d,  $J$  = 6.8 Hz, 3 H);  $^{13}\text{C}$  NMR (150 MHz,  $\text{CDCl}_3$ )  $\delta$  = 209.42, 170.94, 138.89, 136.27, 131.94, 131.60, 131.54, 127.54, 127.52, 127.46, 126.16, 124.47, 119.55, 92.63, 90.08, 48.86, 47.02, 45.55, 37.68, 36.05, 35.24, 34.15, 26.07, 25.73, 21.94, 19.10, 18.94, 17.69, 15.56 ppm; HRMS (ESI-TOF):  $m/z$  calcd for  $\text{C}_{31}\text{H}_{39}\text{O}_4$  ( $\text{M}+\text{H}^+$ ): 475.2843; found 475.2839.

**Table 1.**  $^1\text{H}$  NMR ( $\text{CDCl}_3$ ) and  $^{13}\text{C}$  NMR ( $\text{CDCl}_3$ ) spectroscopic data comparison for natural<sup>[5]</sup> versus synthetic biyouyanagin B (**2**).

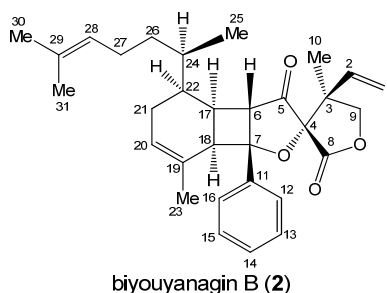

| Position  | Natural <sup>[5]</sup><br>$\delta$ $^1\text{H}$ [ppm, mult, $J$ (Hz)]<br>400 MHz | Synthetic<br>$\delta$ $^1\text{H}$ [ppm, mult, $J$ (Hz)]<br>600 MHz | Natural <sup>[5]</sup><br>$\delta$ $^{13}\text{C}$ [ppm, mult, $J$ (Hz)]<br>100 MHz | Synthetic<br>$\delta$ $^{13}\text{C}$ [ppm, mult, $J$ (Hz)]<br>150 MHz |
|-----------|----------------------------------------------------------------------------------|---------------------------------------------------------------------|-------------------------------------------------------------------------------------|------------------------------------------------------------------------|
| <b>1</b>  | 5.39 (d, 10.8, 1 H)<br>5.44 (d, 16.8, 1 H)                                       | 5.38 (d, $J$ = 10.8, 1 H)<br>5.44 (d, $J$ = 17.5, 1 H)              | 119.1                                                                               | 119.26                                                                 |
| <b>2</b>  | 6.08 (dd, 17.6, 10.8, 1 H)                                                       | 6.07 (dd, $J$ = 17.5, 10.8, 1 H)                                    | 136.2                                                                               | 136.22                                                                 |
| <b>3</b>  |                                                                                  |                                                                     | 48.7                                                                                | 48.83                                                                  |
| <b>4</b>  |                                                                                  |                                                                     | 92.6                                                                                | 92.68                                                                  |
| <b>5</b>  |                                                                                  |                                                                     | 209.3                                                                               | 209.39                                                                 |
| <b>6</b>  | 3.30 (m, 1 H)                                                                    | 3.29 (1 H, m)                                                       | 48.7                                                                                | 48.83                                                                  |
| <b>7</b>  |                                                                                  |                                                                     | 88.5                                                                                | 88.60                                                                  |
| <b>8</b>  |                                                                                  |                                                                     | 170.8                                                                               | 170.92                                                                 |
| <b>9</b>  | 3.98 (d, 8.8, 1 H)<br>4.73 (d, 8.8, 1 H)                                         | 3.97 (d, $J$ = 8.7, 1 H)<br>4.72 (d, $J$ = 8.7, 1 H)                | 73.9                                                                                | 74.03                                                                  |
| <b>10</b> | 1.52 (s, 3 H)                                                                    | 1.51 (s, 3 H)                                                       | 18.8                                                                                | 18.84                                                                  |
| <b>11</b> |                                                                                  |                                                                     | 138.6                                                                               | 138.89                                                                 |
| <b>12</b> | 7.28 (m, 1 H)                                                                    | 7.28 (m, 1 H)                                                       | 126.0                                                                               | 126.16                                                                 |
| <b>13</b> | 7.28 (m, 1 H)                                                                    | 7.28 (m, 1 H)                                                       | 127.0                                                                               | 127.46                                                                 |
| <b>14</b> | 7.28 (m, 1 H)                                                                    | 7.28 (m, 1 H)                                                       | 127.3                                                                               | 127.52                                                                 |
| <b>15</b> | 7.28 (m, 1 H)                                                                    | 7.28 (m, 1 H)                                                       | 127.0                                                                               | 127.46                                                                 |
| <b>16</b> | 7.28 (m, 1 H)                                                                    | 7.28 (m, 1 H)                                                       | 126.0                                                                               | 126.16                                                                 |
| <b>17</b> | 3.30 (m, 1 H)                                                                    | 3.29 (m, 1 H)                                                       | 33.0                                                                                | 33.08                                                                  |
| <b>18</b> | 3.04 (brd, 6.4, 1 H)                                                             | 3.03 (d, $J$ = 7.4, 1 H)                                            | 51.1                                                                                | 51.19                                                                  |
| <b>19</b> |                                                                                  |                                                                     | 131.7                                                                               | 131.77                                                                 |
| <b>20</b> | 5.58 (brd, 6.4, 1 H)                                                             | 5.57 (d, $J$ = 6.9, 1 H)                                            | 124.7                                                                               | 124.77                                                                 |
| <b>21</b> | 1.82 (m, 1 H)<br>2.29 (m, 1 H)                                                   | 1.83 (m, 1 H)<br>2.29 (m, 1 H)                                      | 25.4                                                                                | 25.53                                                                  |
| <b>22</b> | 1.28 (m, 1 H)                                                                    | 1.27 (m, 1 H)                                                       | 37.8                                                                                | 37.89                                                                  |
| <b>23</b> | 0.93 (s, 3 H)                                                                    | 0.92 (3 H, s)                                                       | 22.1                                                                                | 22.23                                                                  |
| <b>24</b> | 1.47 (m, 1 H)                                                                    | 1.47 (m, 1 H)                                                       | 33.9                                                                                | 33.92                                                                  |
| <b>25</b> | 0.97 (3 H, d, 6.8)                                                               | 0.96 (d, $J$ = 6.7, 3 H)                                            | 16.5                                                                                | 16.65                                                                  |
| <b>26</b> | 1.08 (m, 1 H)<br>1.47 (m, 1 H)                                                   | 1.08 (m, 1 H)<br>1.47 (m, 1 H)                                      | 34.3                                                                                | 34.37                                                                  |
| <b>27</b> | 1.98 (m, 2 H)                                                                    | 1.94 (m, 1 H)<br>2.01 (m, 1 H)                                      | 24.8                                                                                | 24.90                                                                  |
| <b>28</b> | 5.12 (t, 6.4, 1 H)                                                               | 5.11 (t, $J$ = 7.0, 1 H)                                            | 124.6                                                                               | 124.66                                                                 |
| <b>29</b> |                                                                                  |                                                                     | 131.1                                                                               | 131.20                                                                 |
| <b>30</b> | 1.71 (s, 3 H)                                                                    | 1.70 (s, 3 H)                                                       | 25.6                                                                                | 25.73                                                                  |
| <b>31</b> | 1.65 (s, 3 H)                                                                    | 1.64 (s, 3 H)                                                       | 17.6                                                                                | 17.69                                                                  |

## II. References

- [1] D. G. Joshi, S. N. Kulkarni, *Ind. J. Chem.* **1968**, *6*, 127–129.
- [2] J. G. Millar, *J. Nat. Prod.* **1998**, *61*, 1025–1026.
- [3] K. C. Nicolaou, T. R. Wu, D. Sarlah, D. M. Shaw, E. Rowcliffe, D. R. Burton, *J. Am. Chem. Soc.* **2008**, *130*, 11114–11121.
- [4] K. C. Nicolaou, D. Sarlah, D. M. Shaw, *Angew. Chem.* **2007**, *119*, 4792–4795; *Angew. Chem. Int. Ed.* **2007**, *46*, 4708–4711.
- [5] N. Tanaka, Y. Kashiwada, S. Y. Kim, W. Hashida, M. Sekiya, Y. Takaishi, *J. Nat. Prod.* **2009**, *72*, 1447–1452.

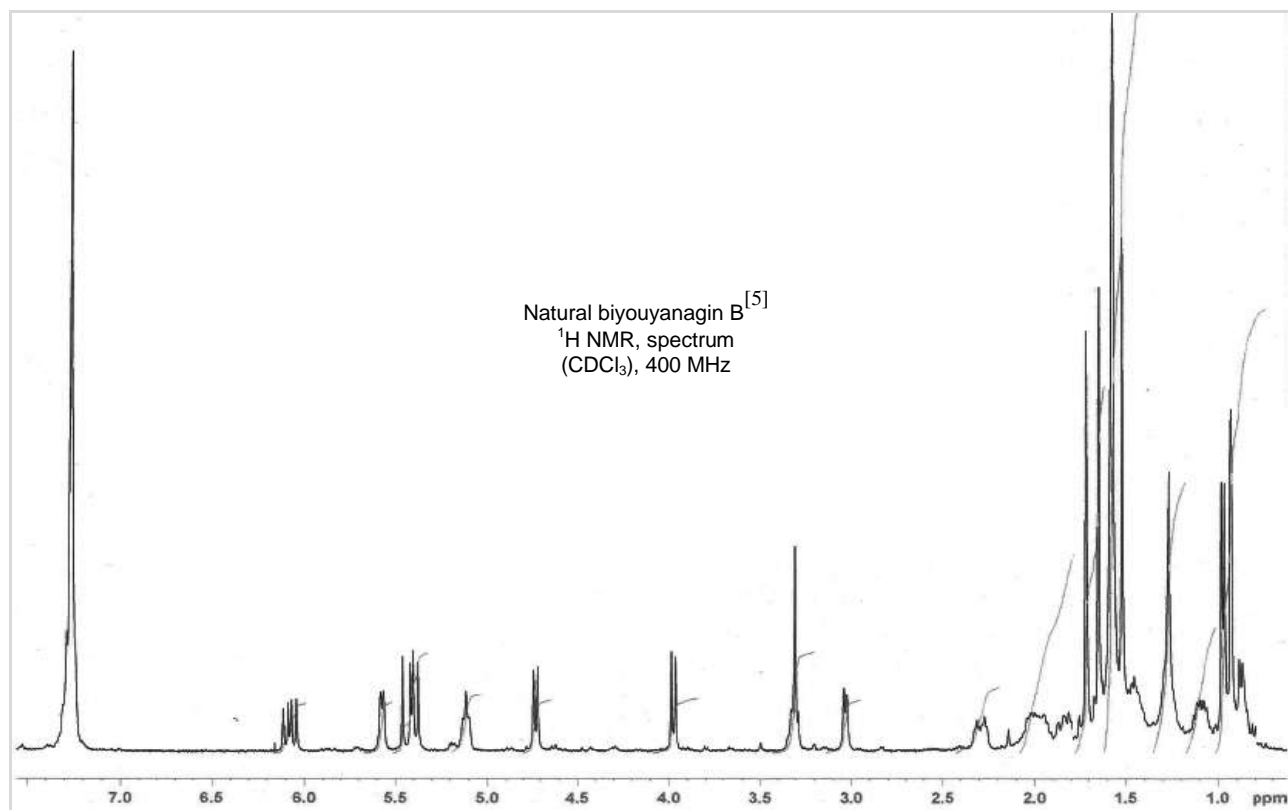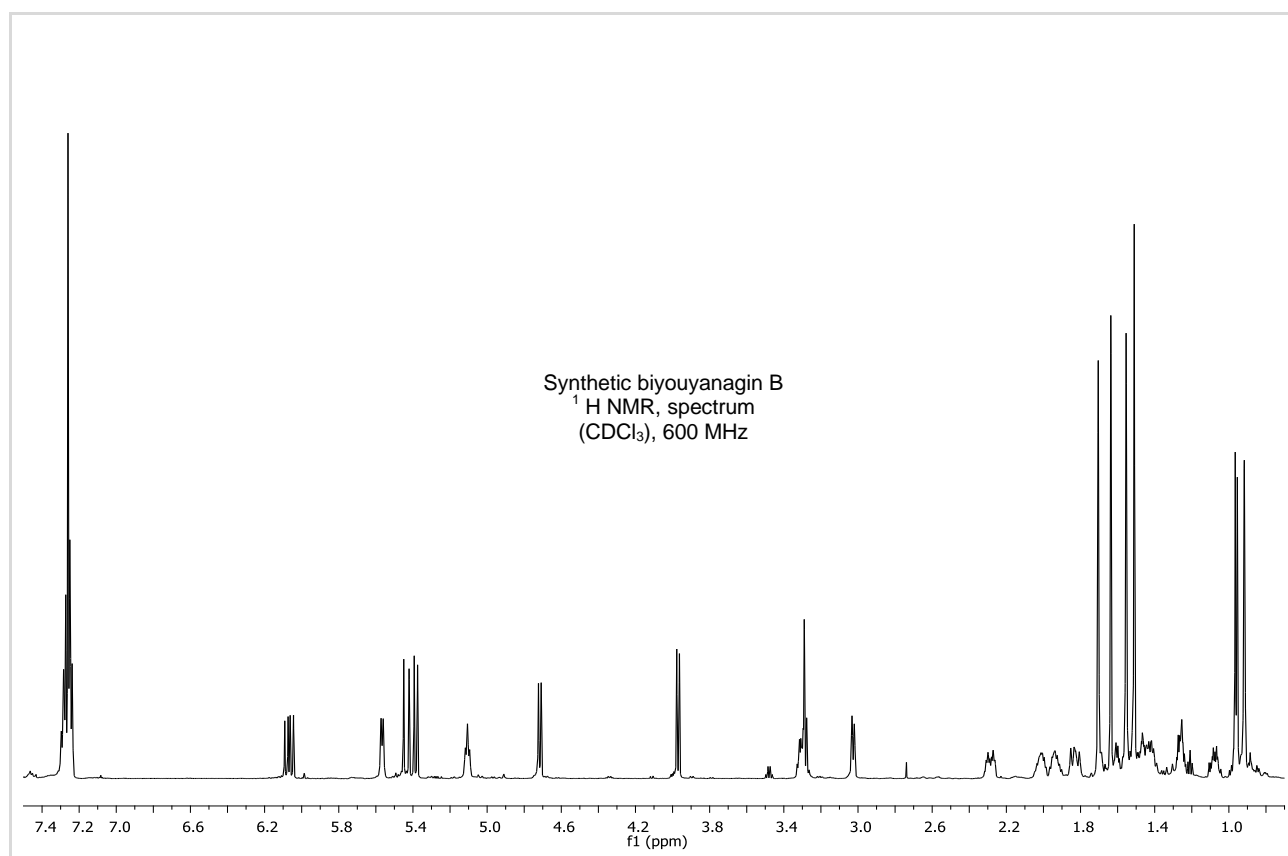

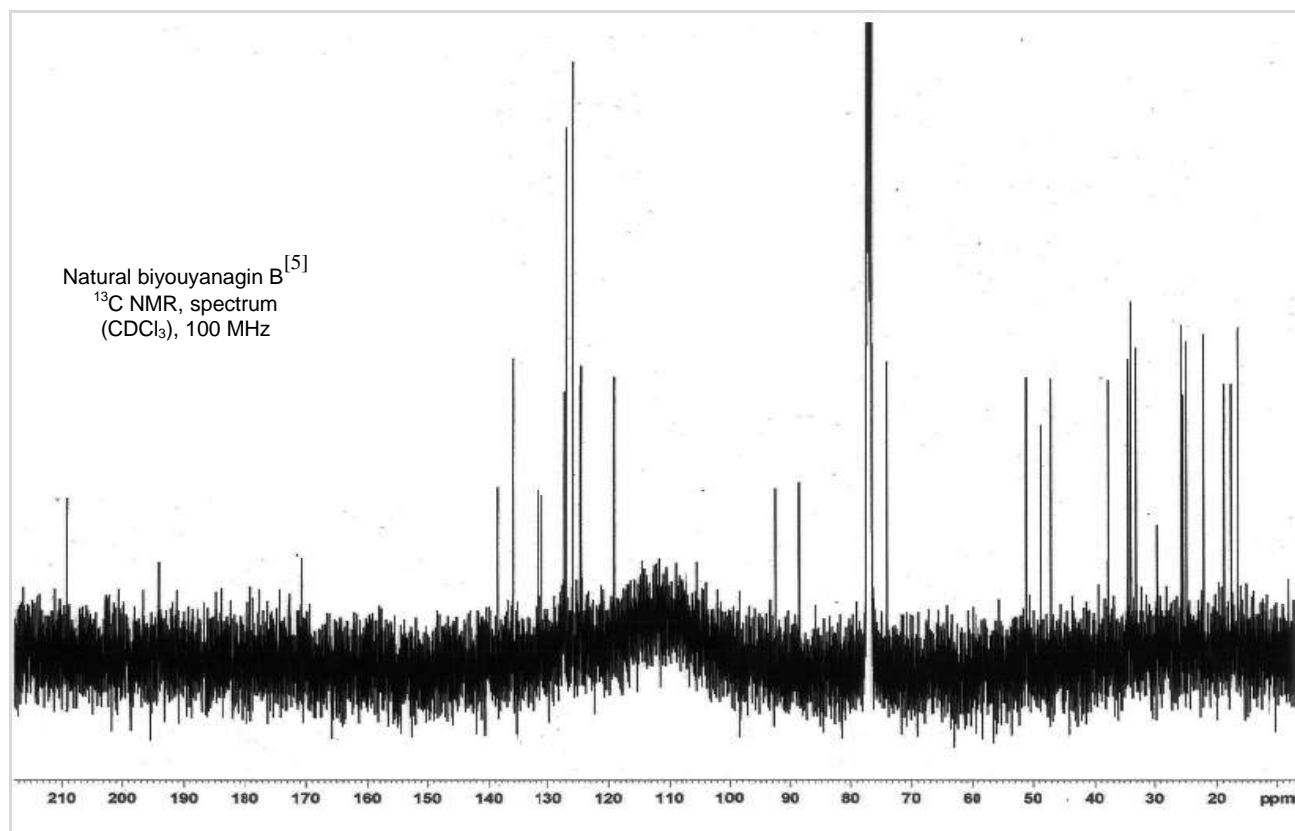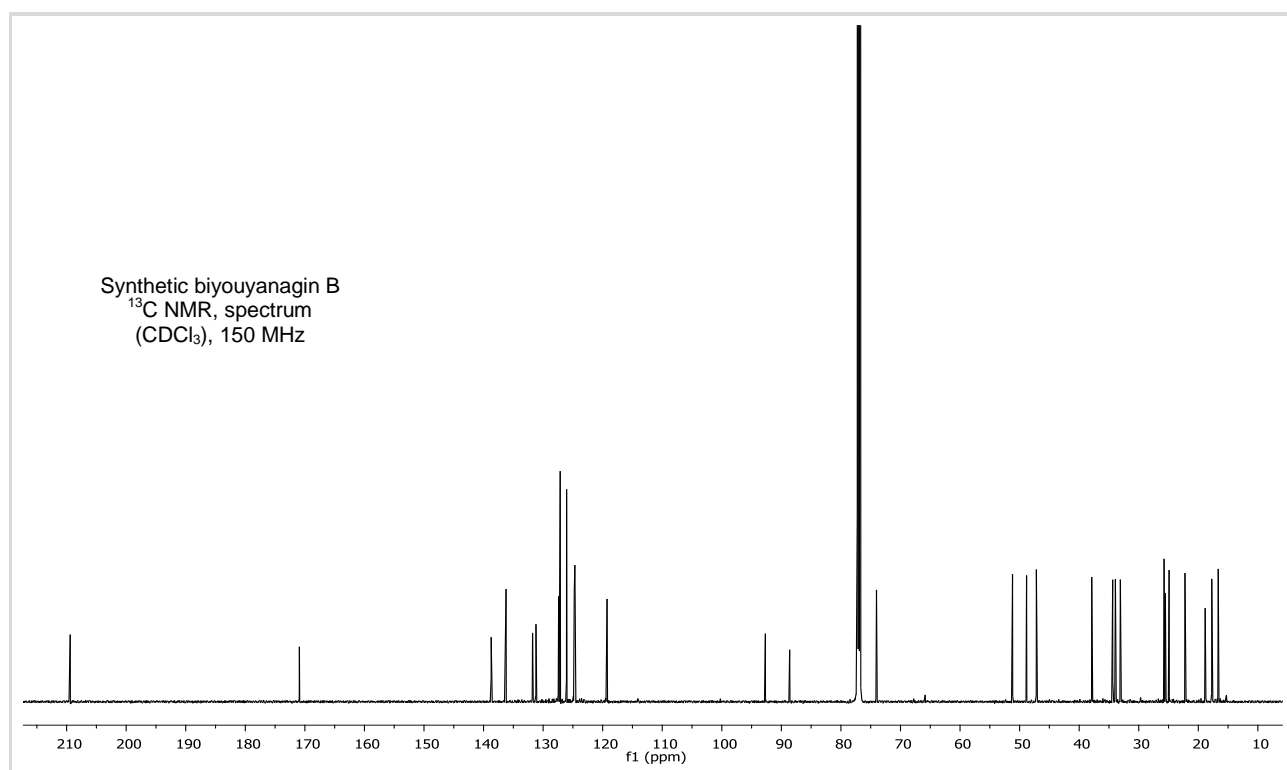

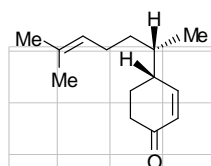

enone precursor to  
zingiberene (3')

$^1\text{H}$  NMR, spectrum  
( $\text{CDCl}_3$ ), 600 MHz

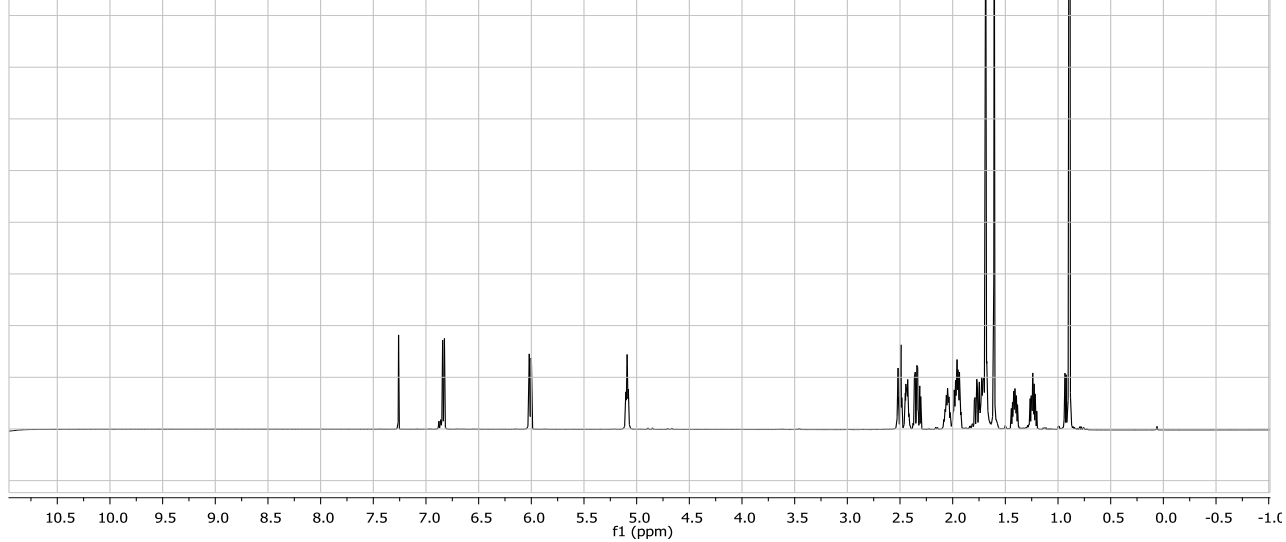

$^{13}\text{C}$  NMR, spectrum  
( $\text{CDCl}_3$ ), 150 MHz

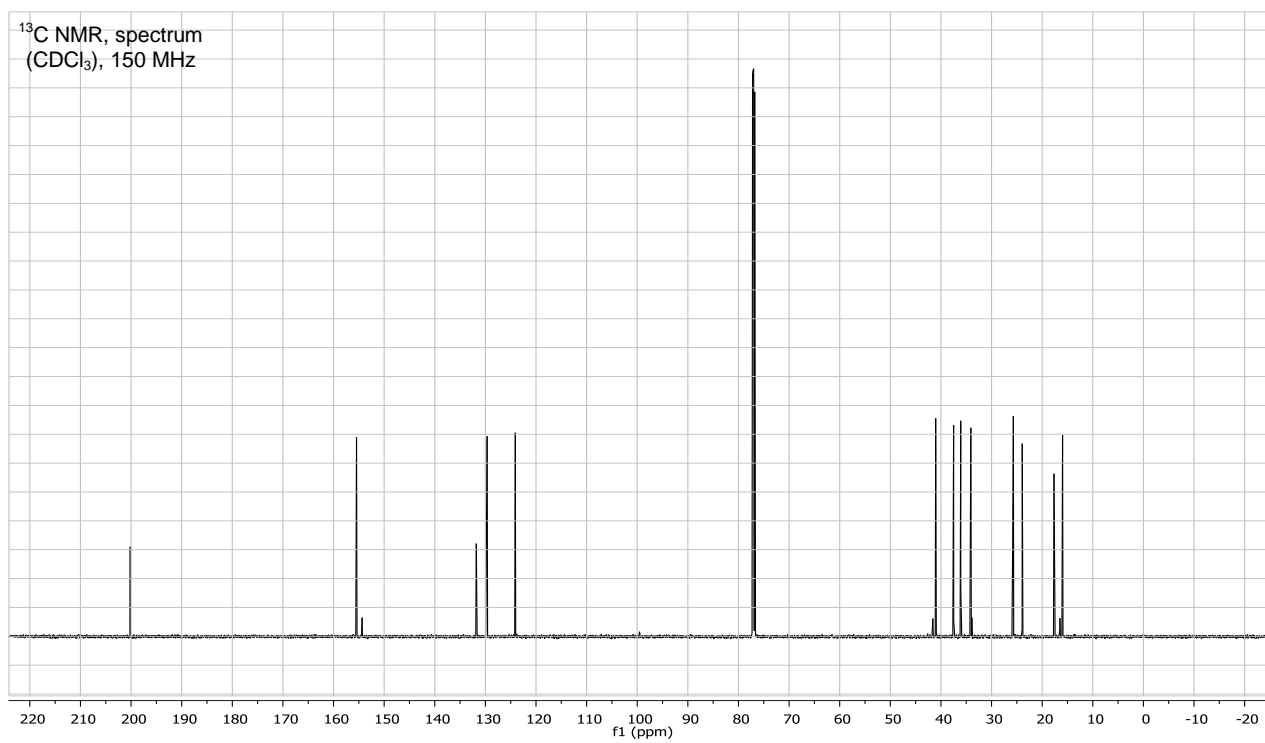

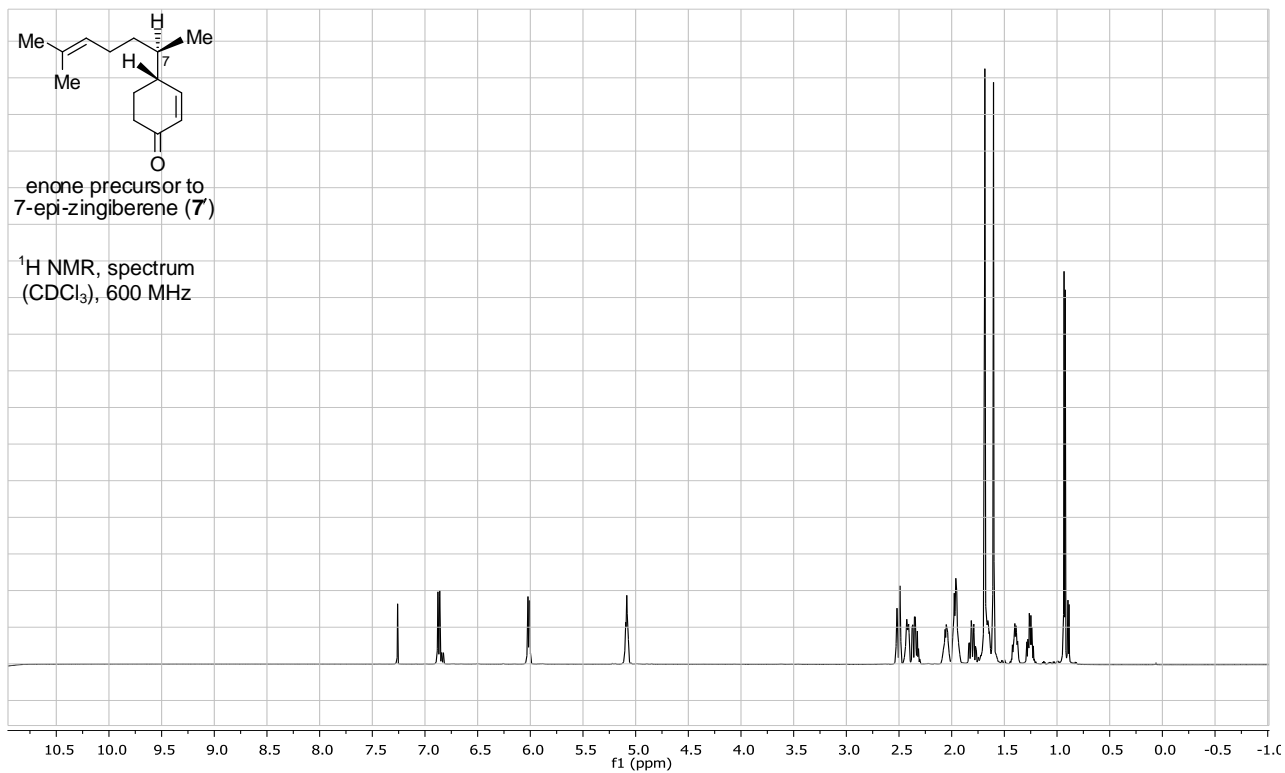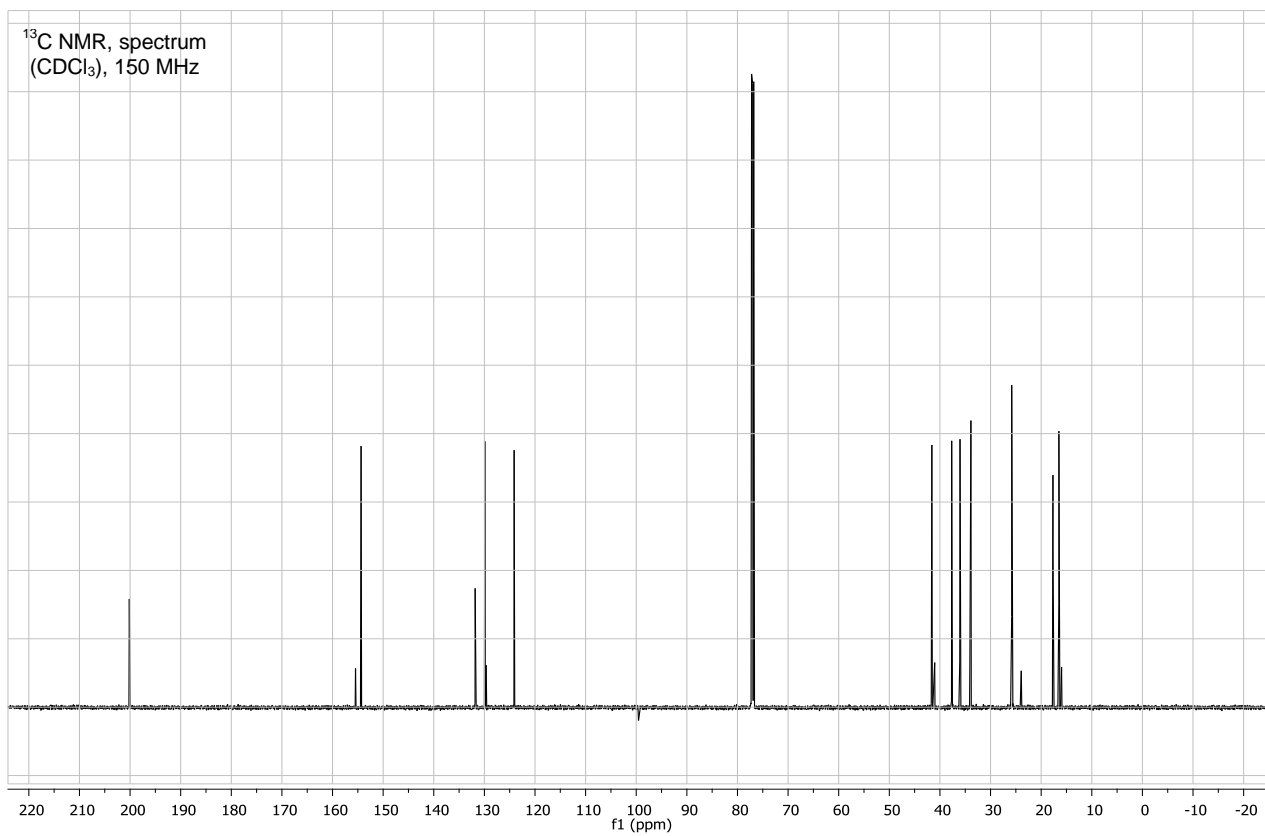



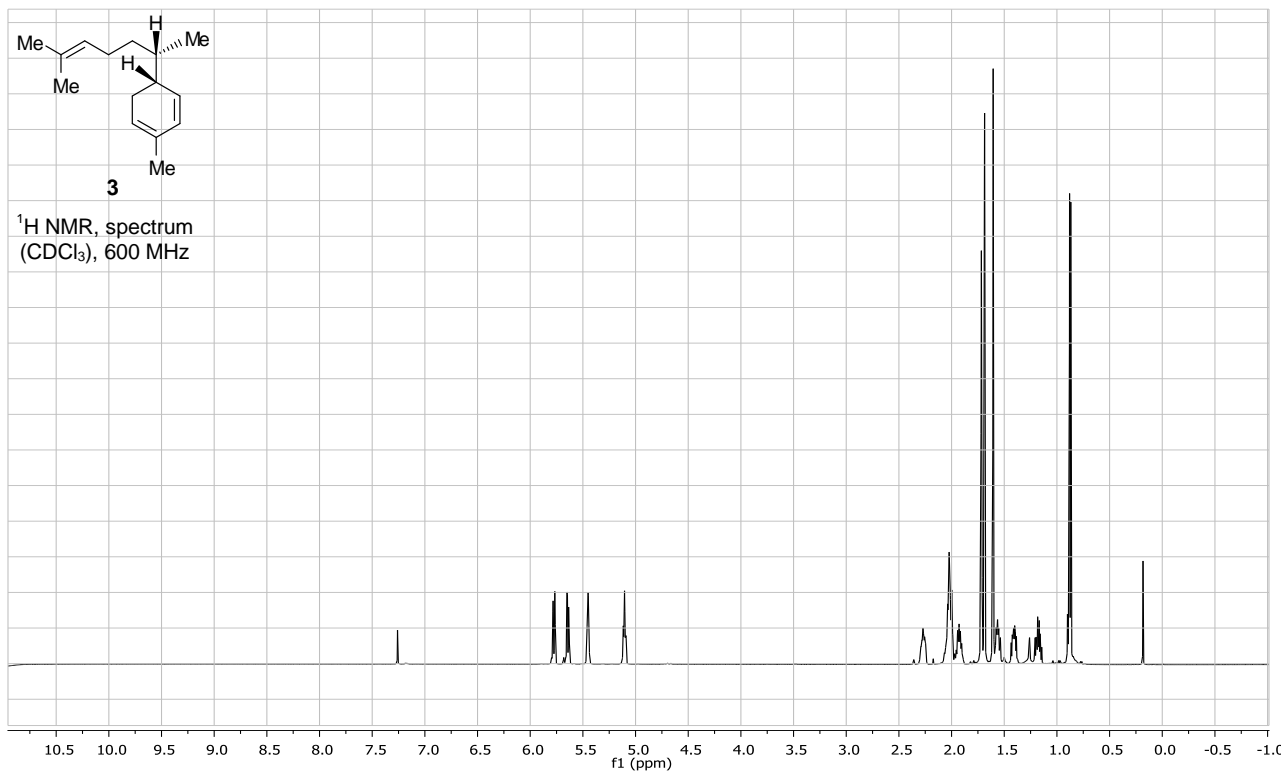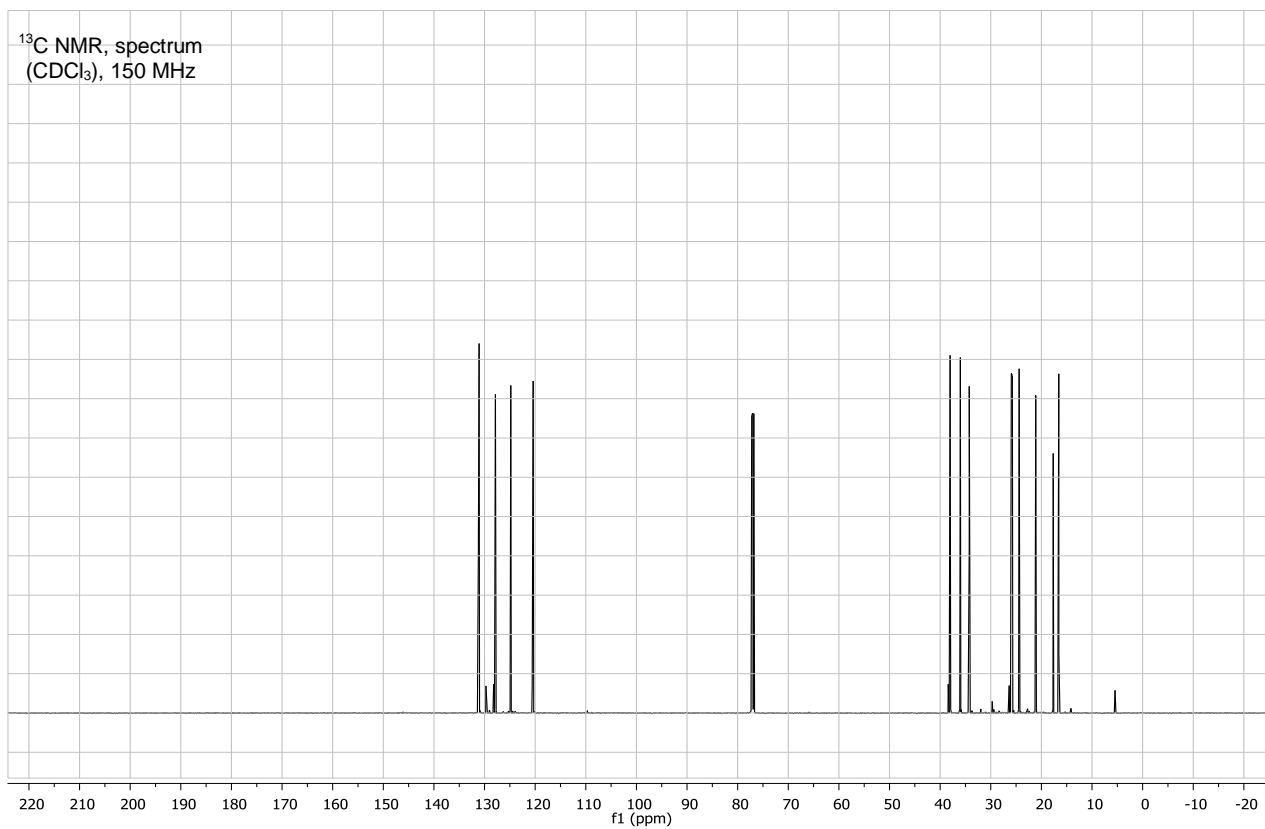

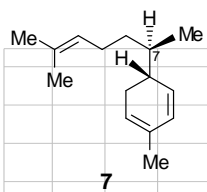

<sup>1</sup>H NMR, spectrum  
(CDCl<sub>3</sub>), 600 MHz

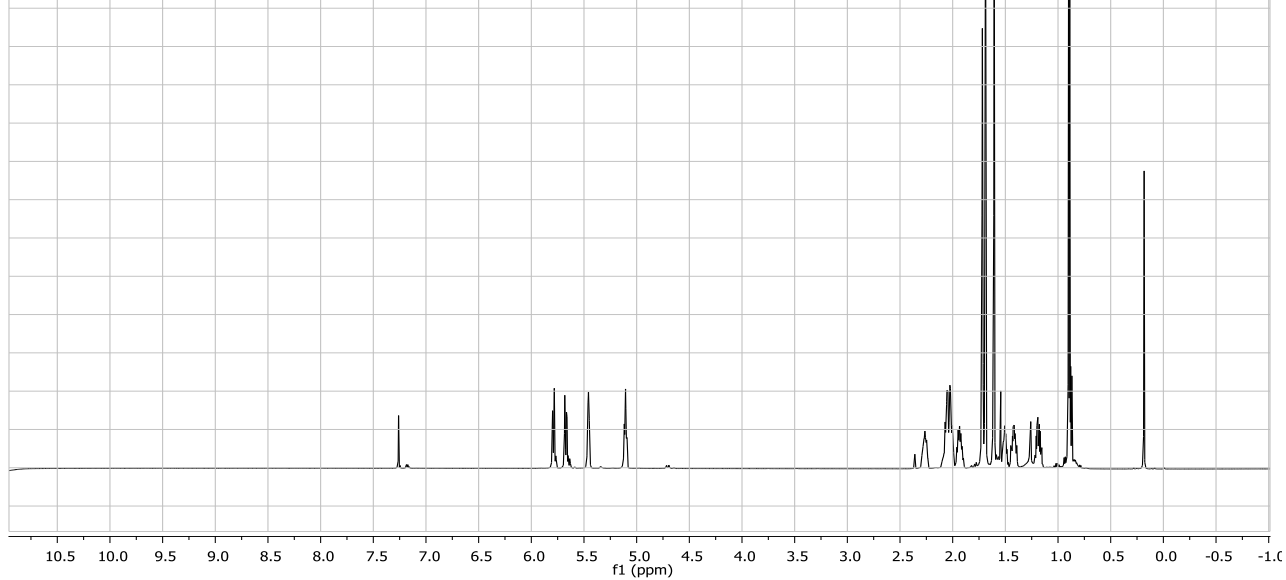

<sup>13</sup>C NMR, spectrum  
(CDCl<sub>3</sub>), 150 MHz

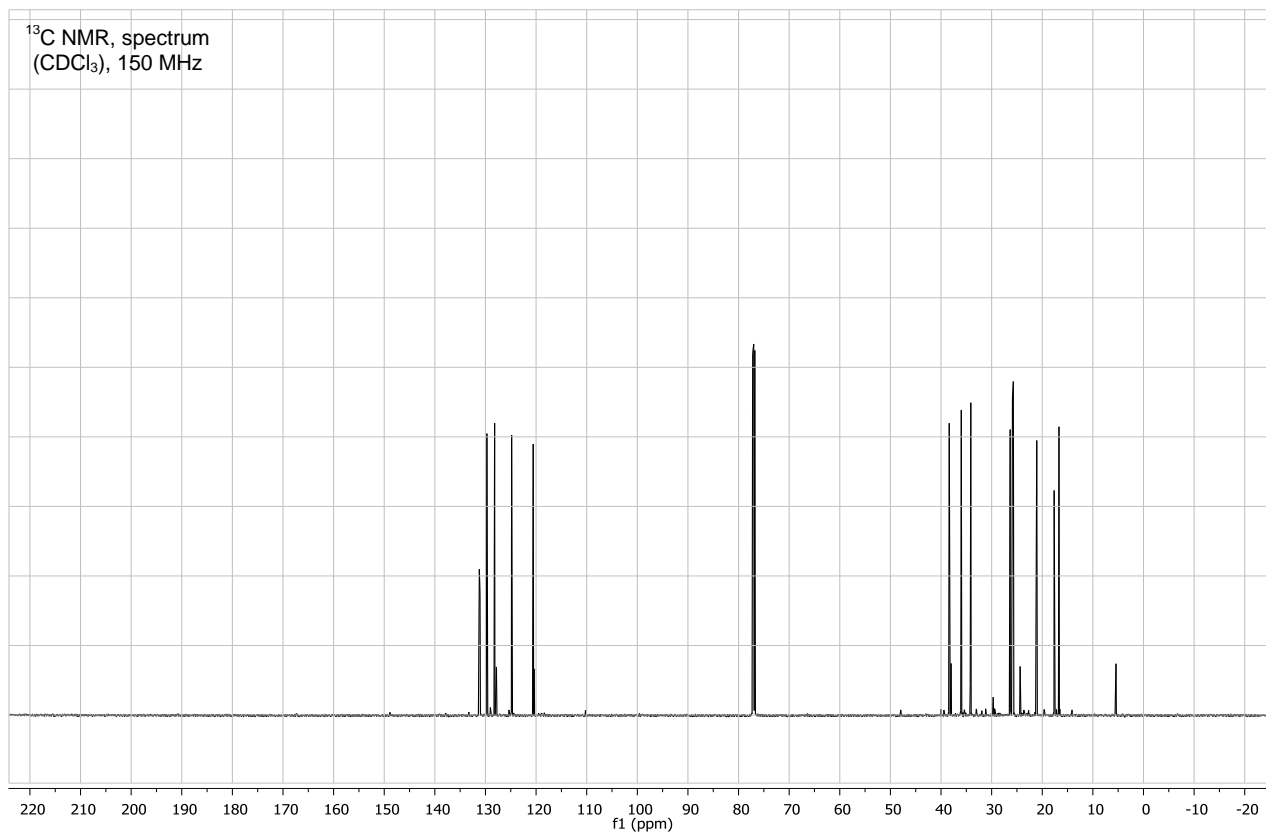

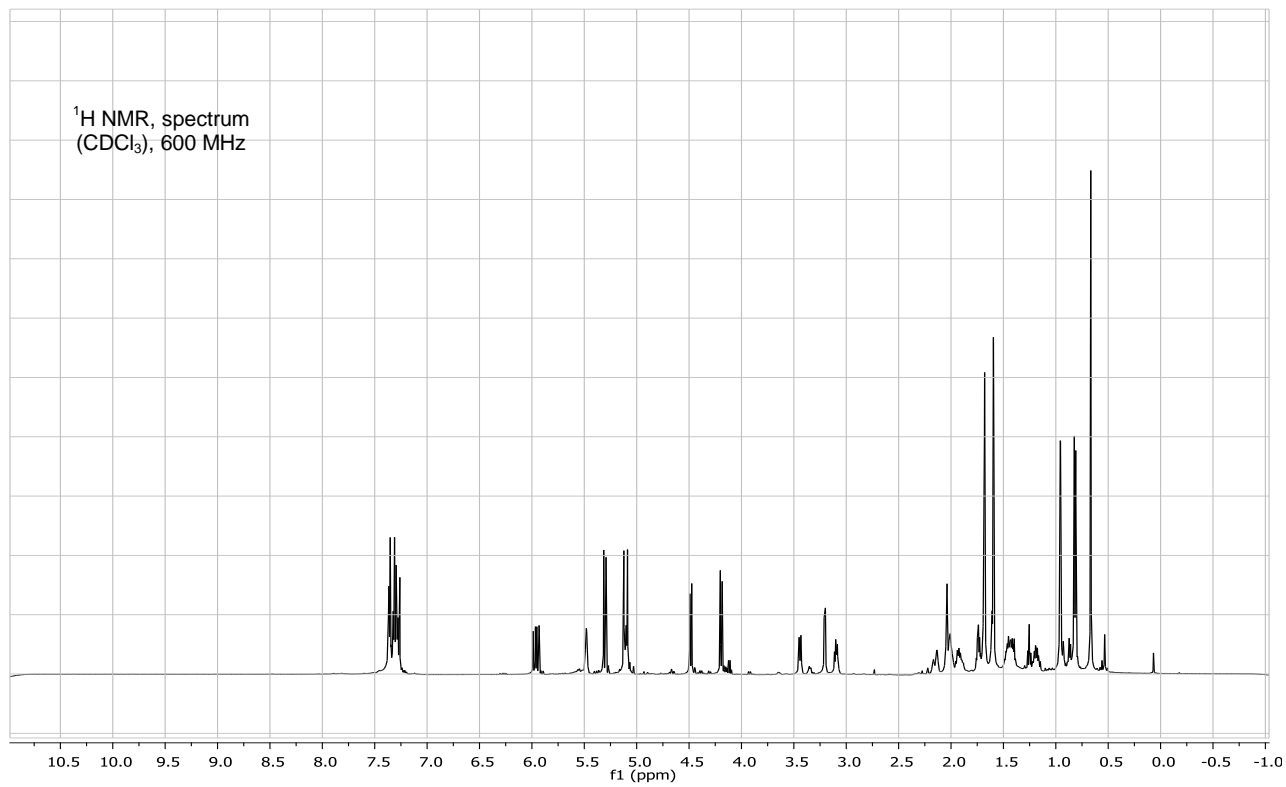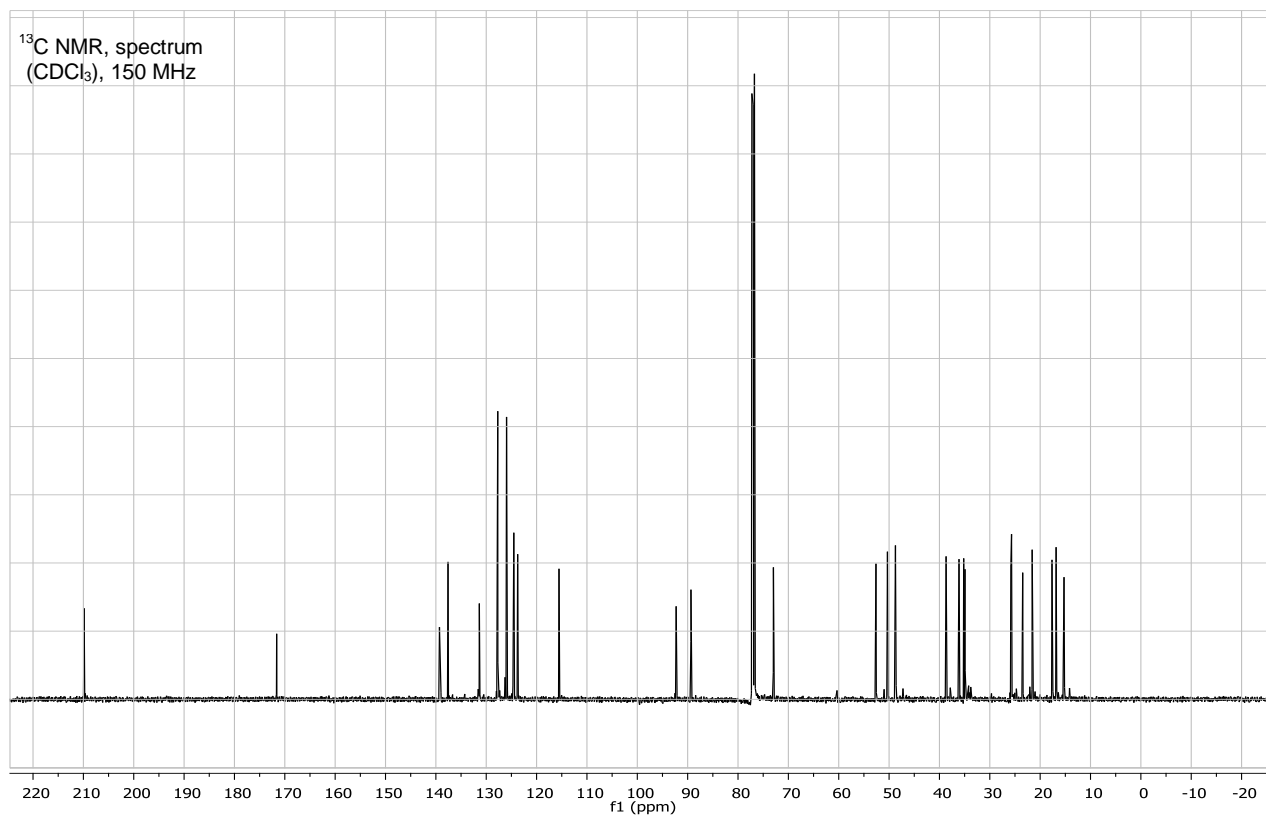

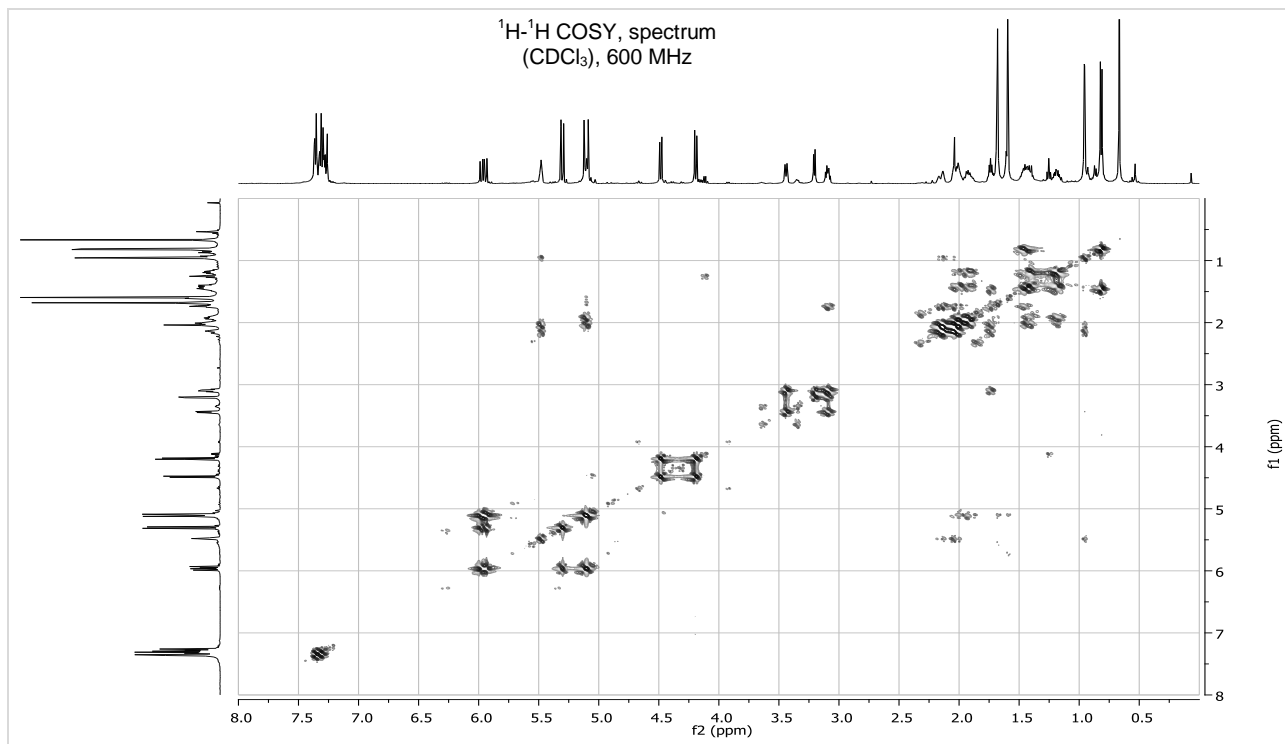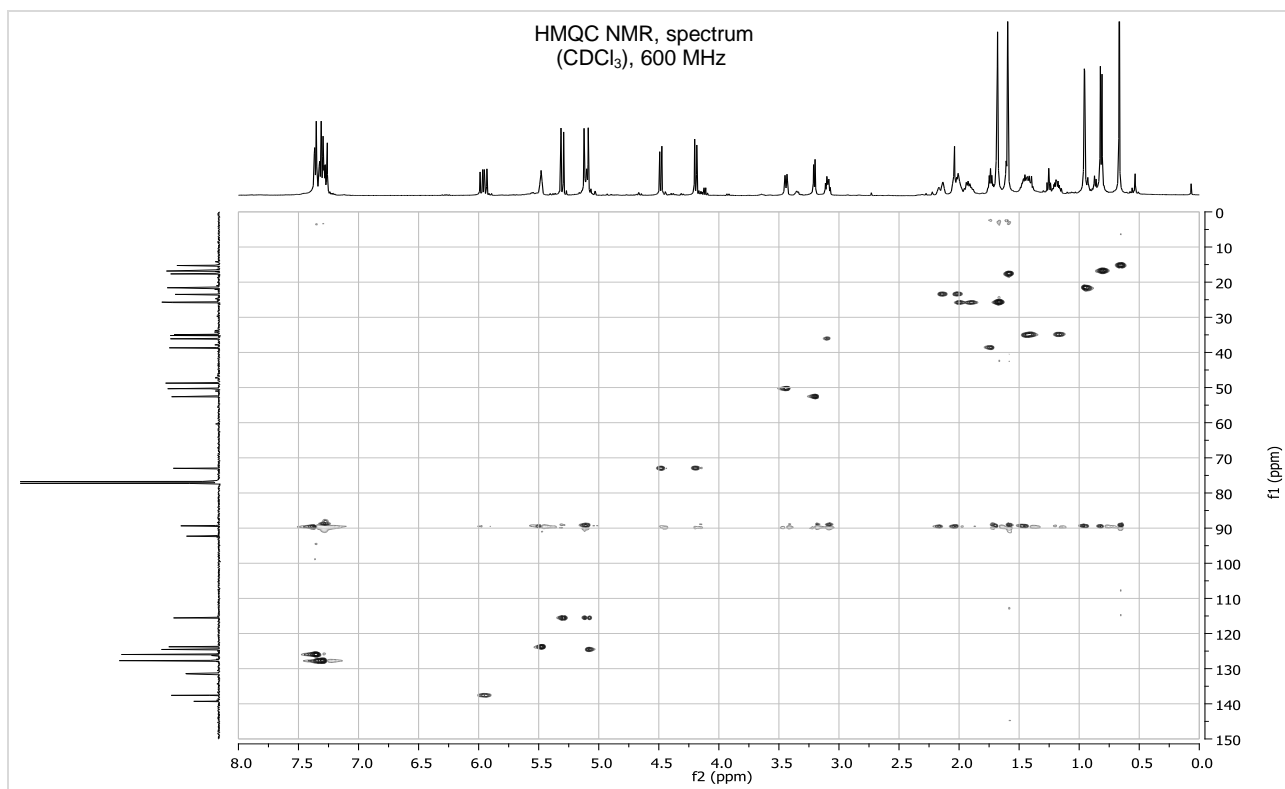

HMBC NMR, spectrum  
(CDCl<sub>3</sub>), 600 MHz

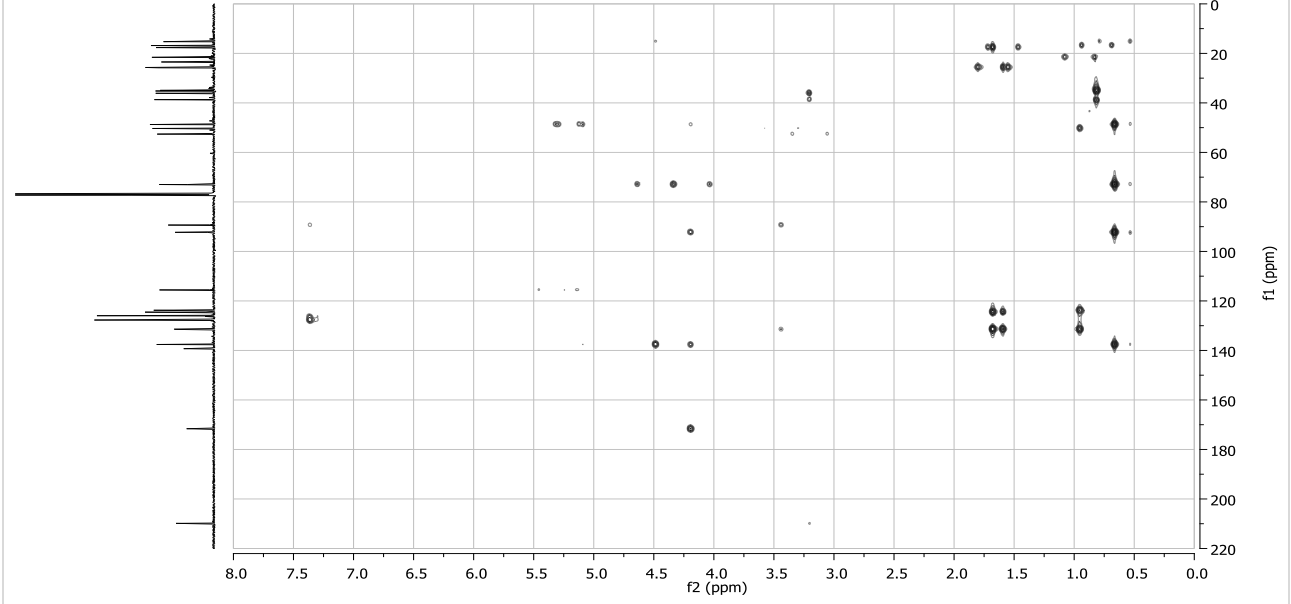

ROESY NMR, spectrum  
(CDCl<sub>3</sub>), 600 MHz

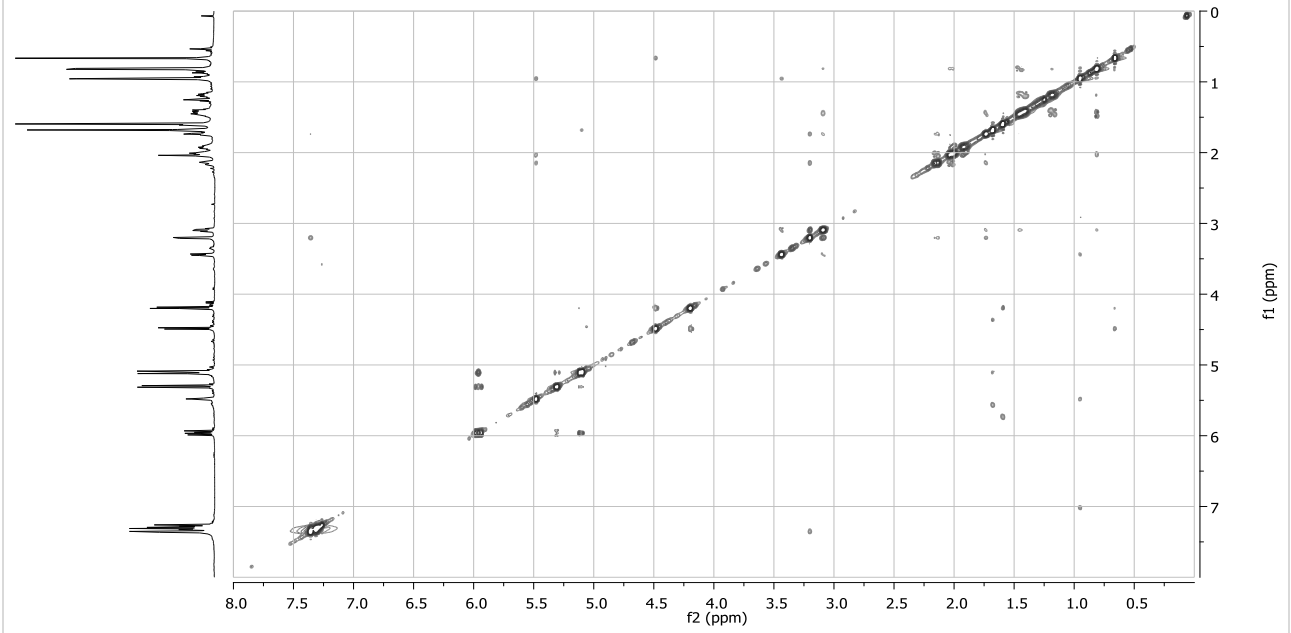

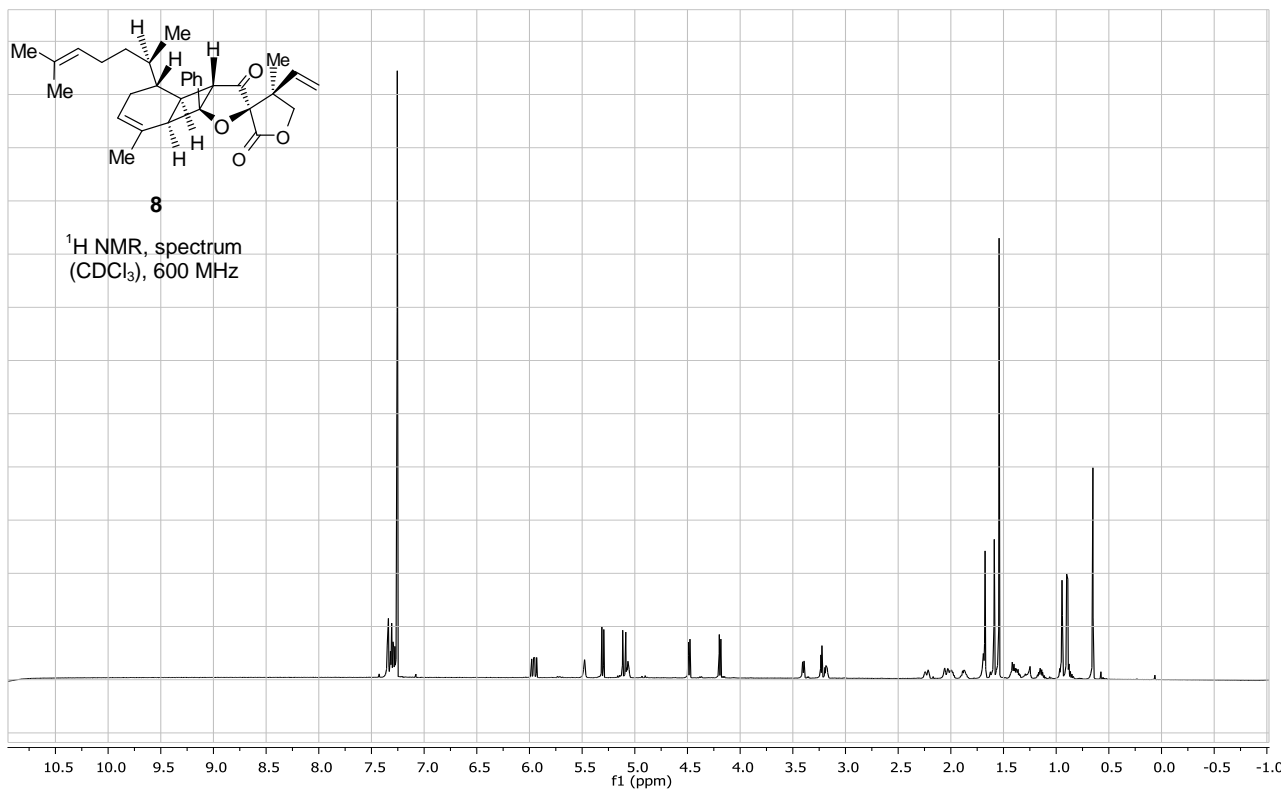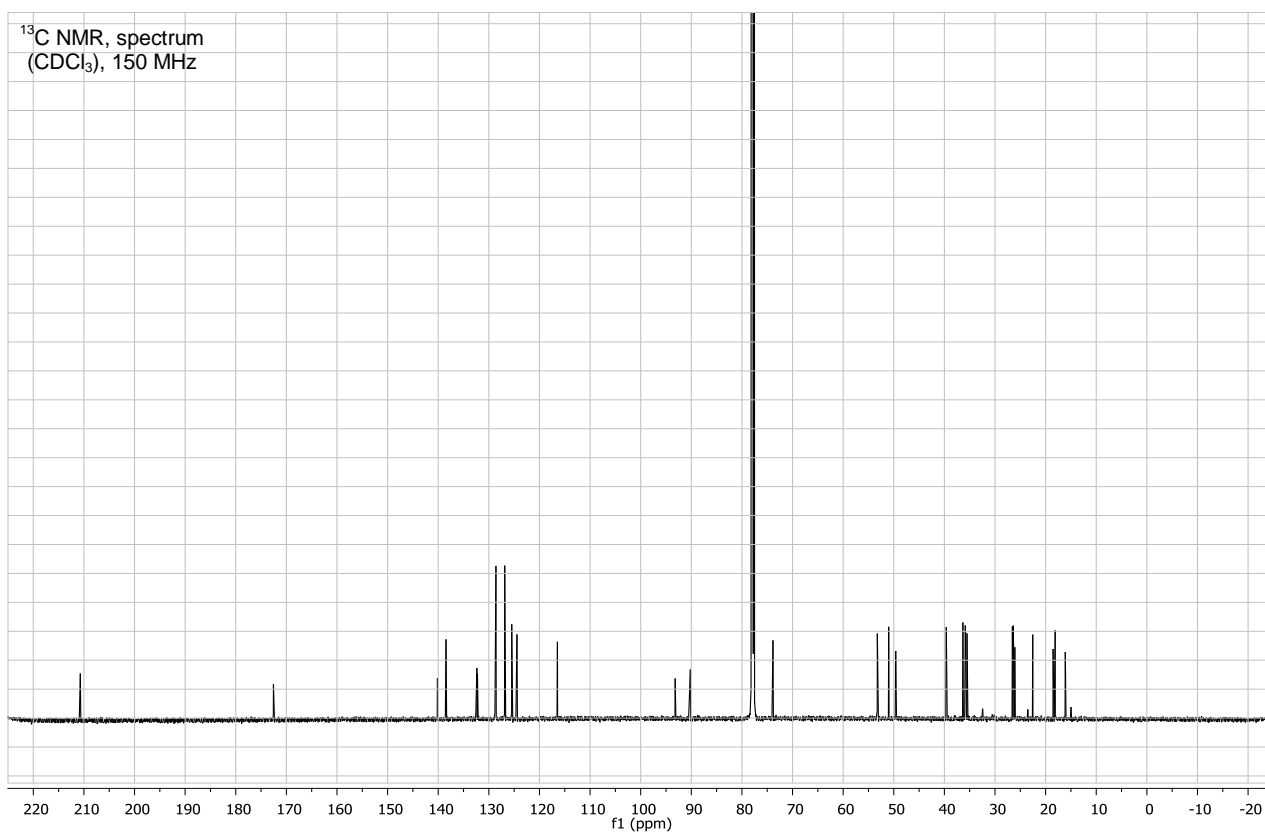

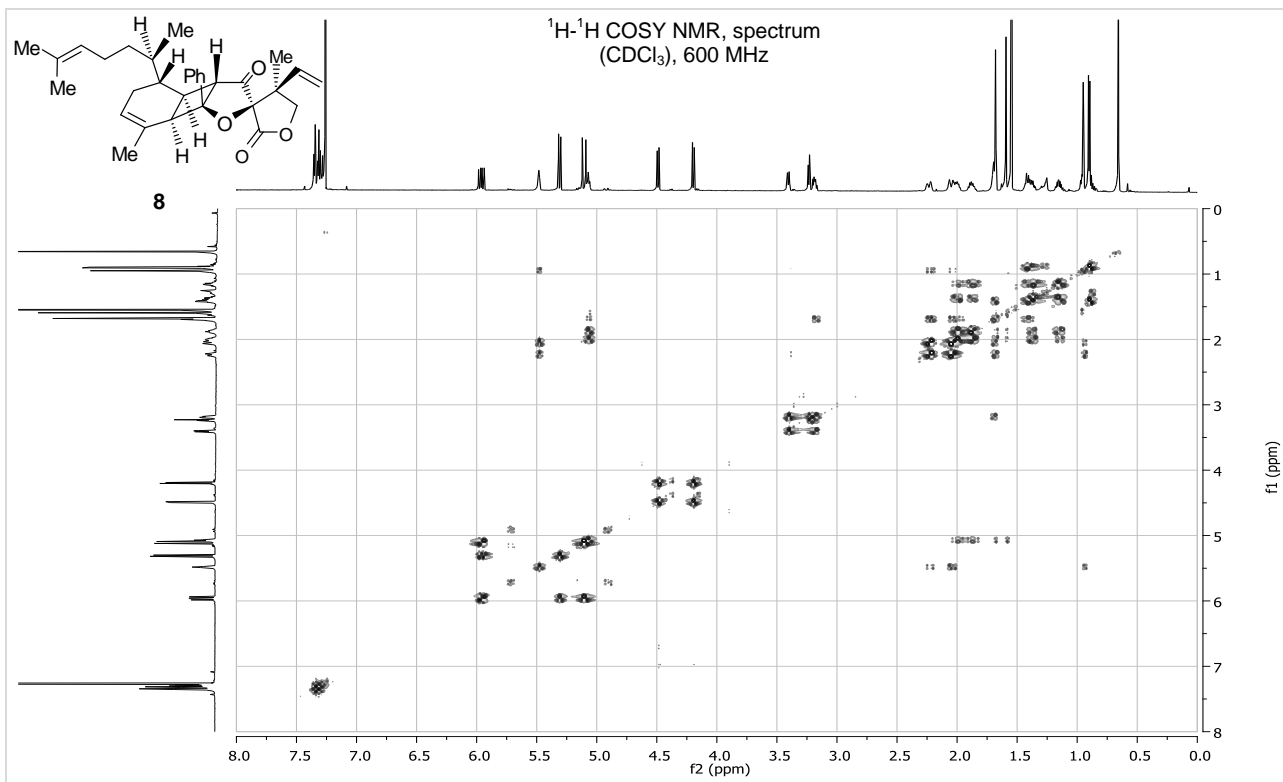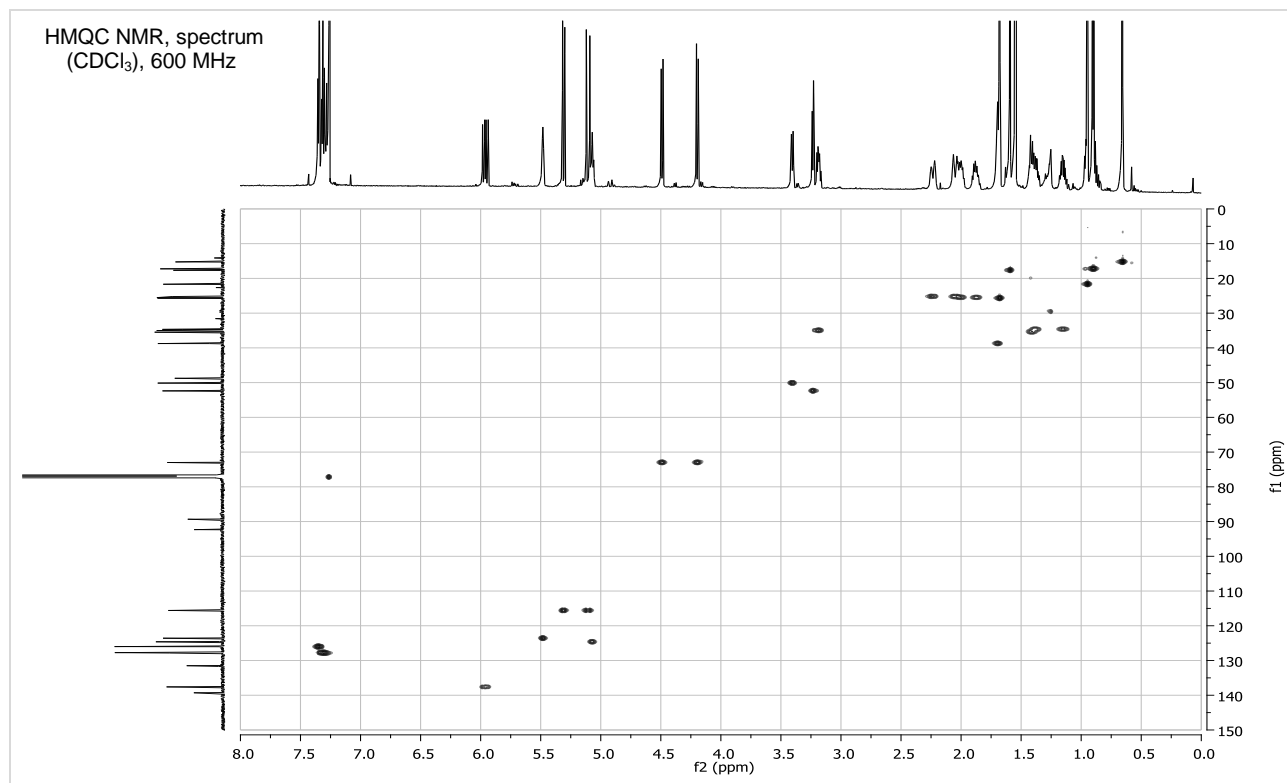

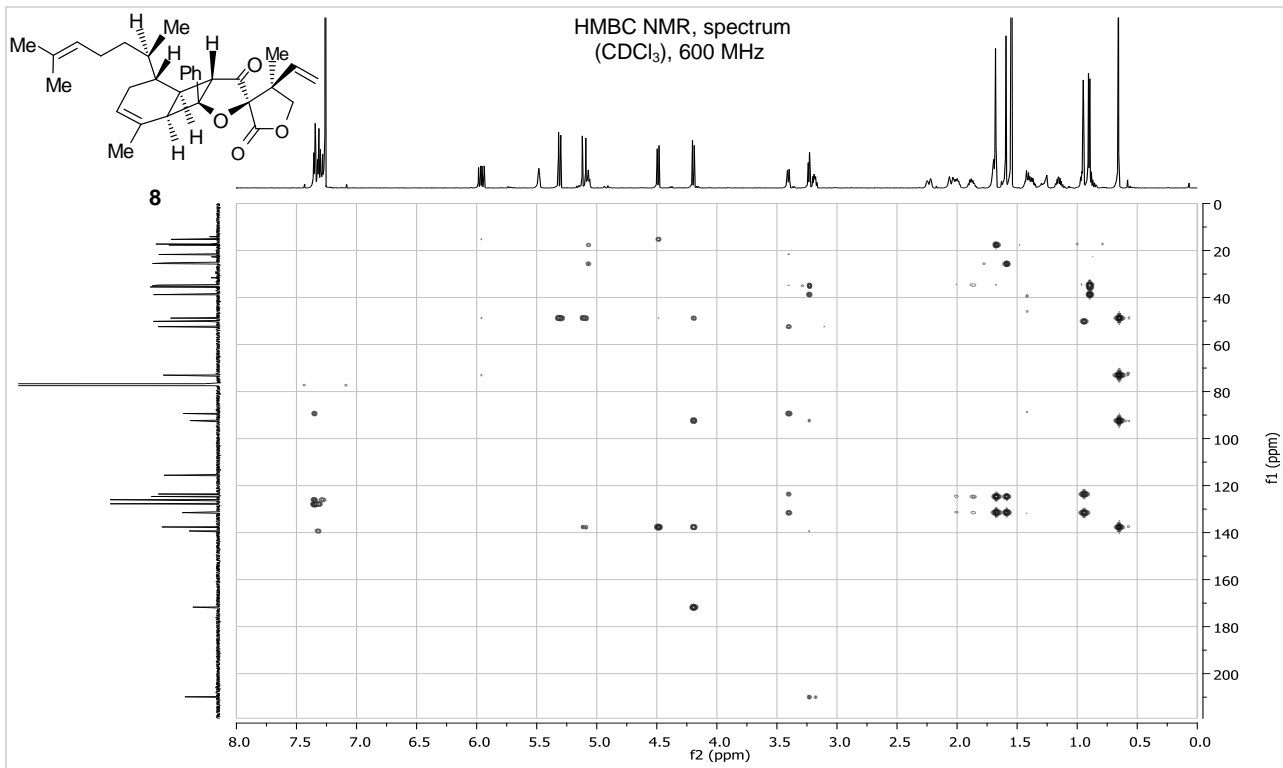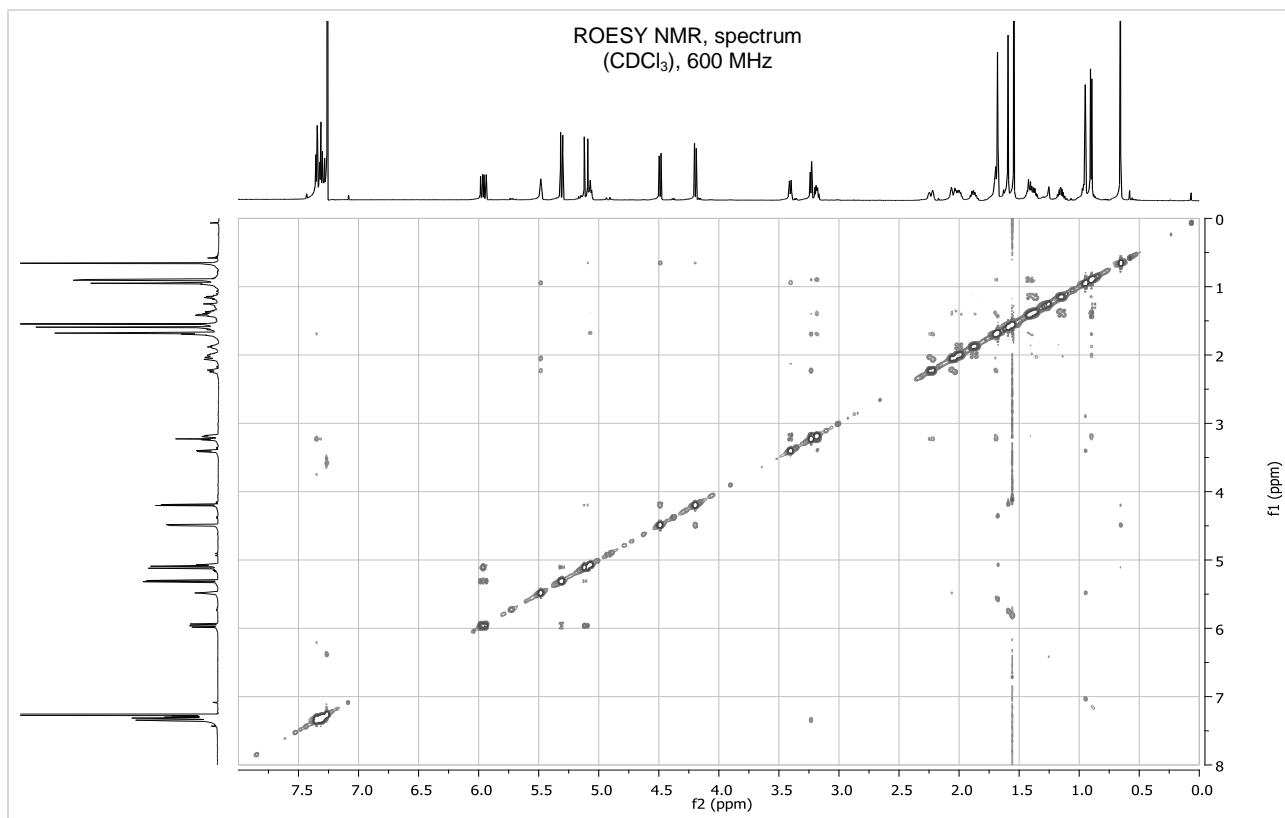



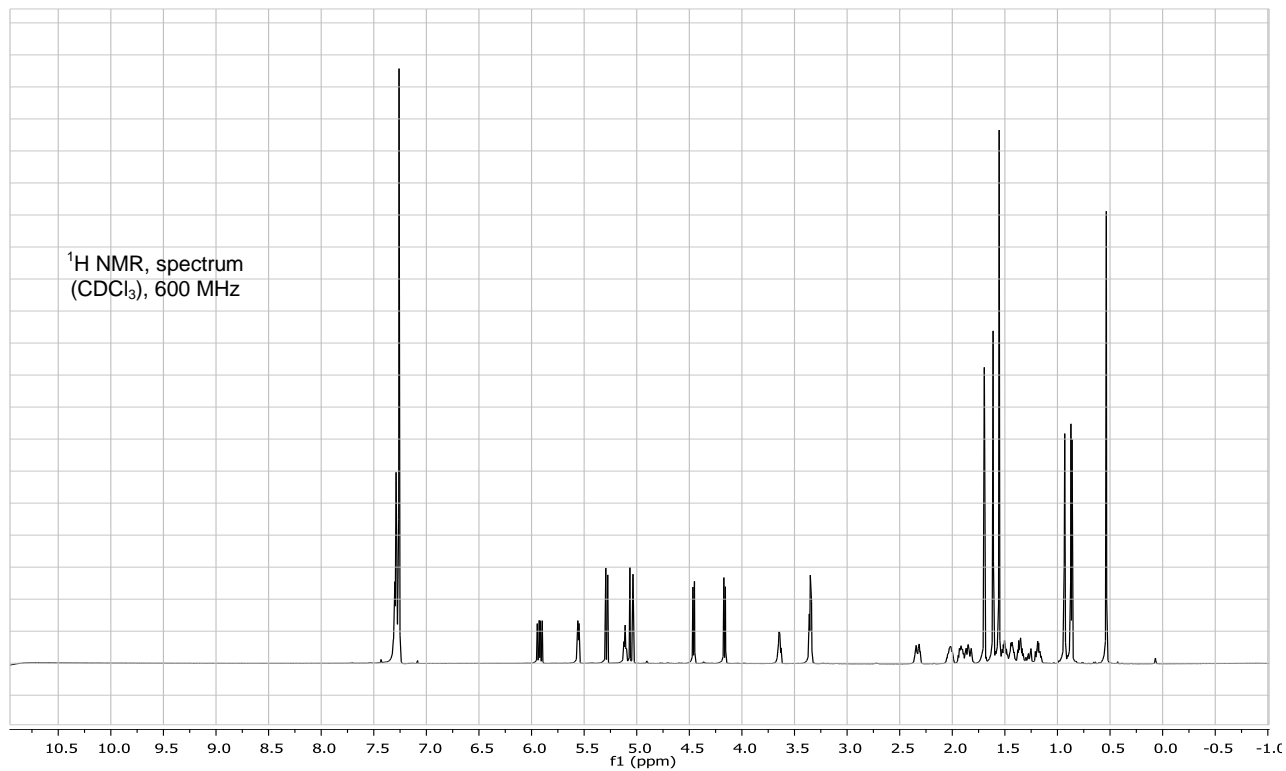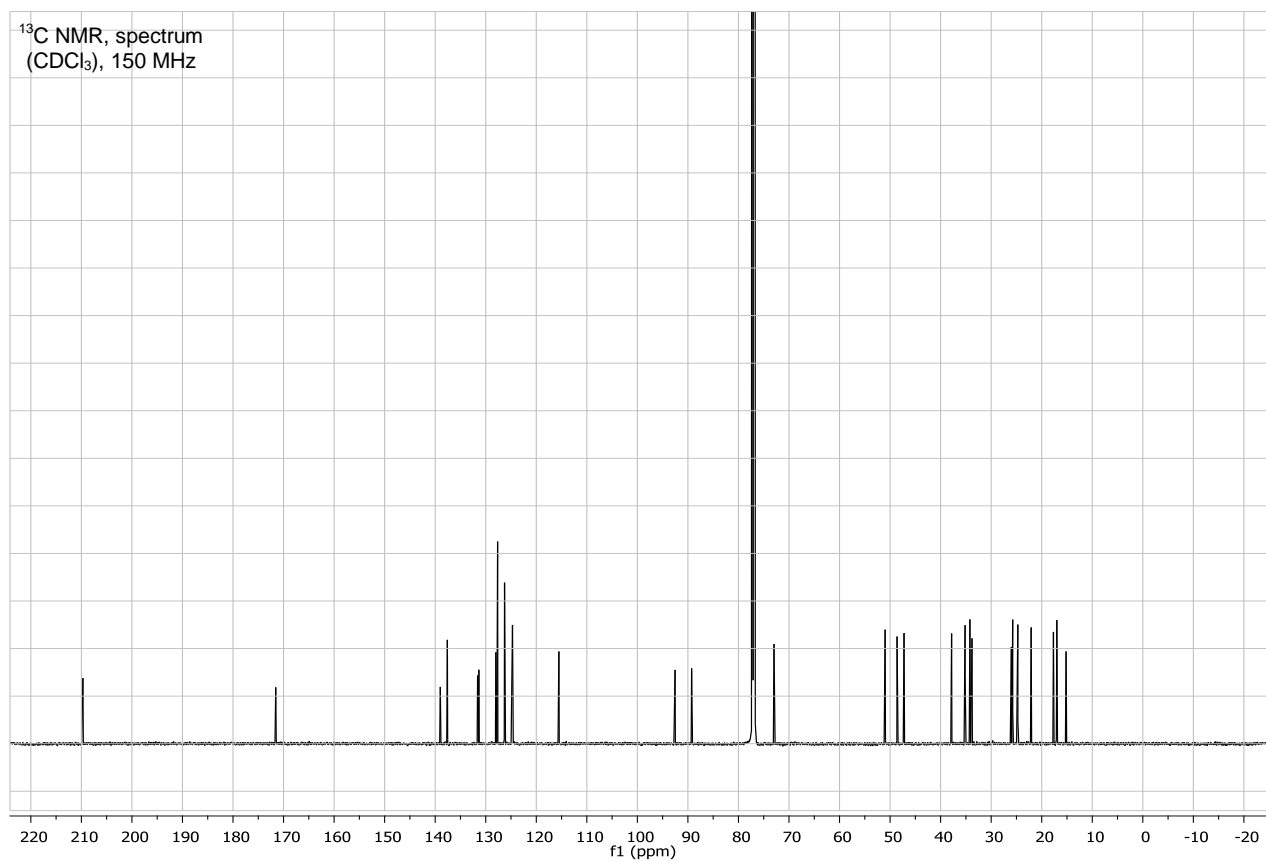

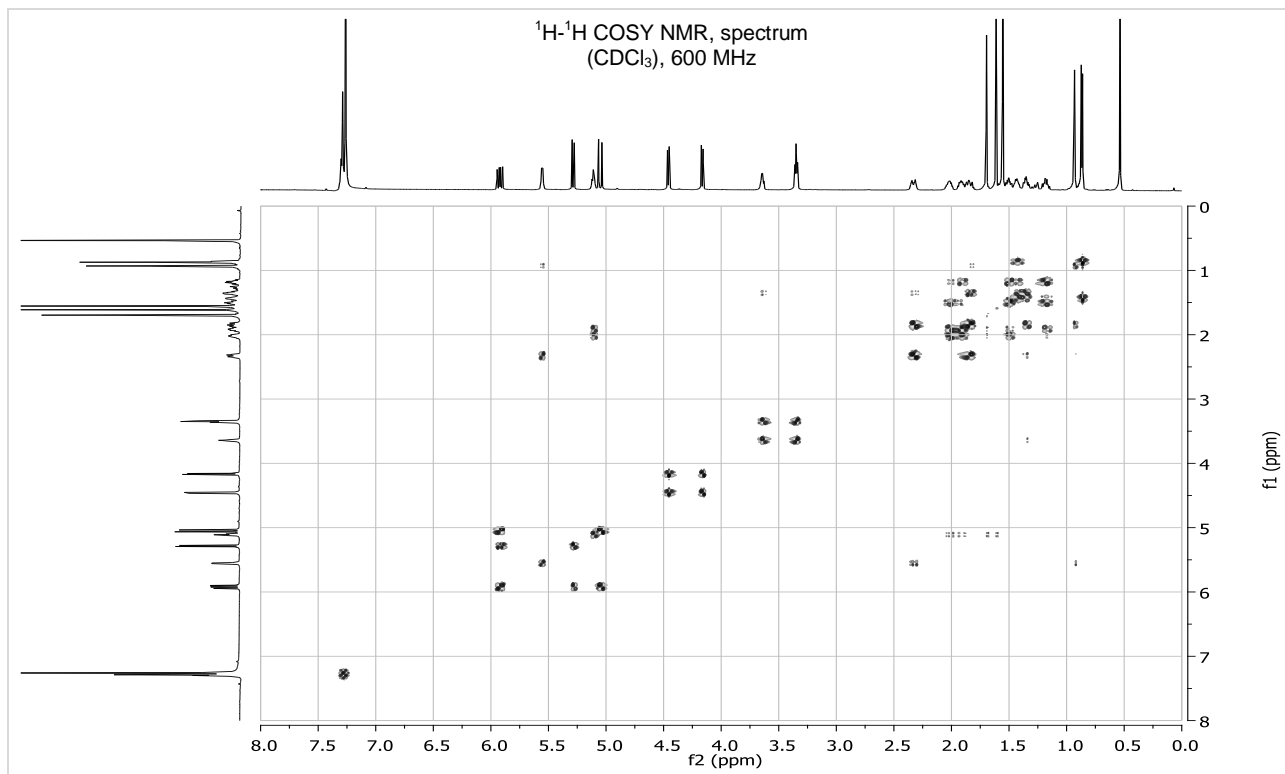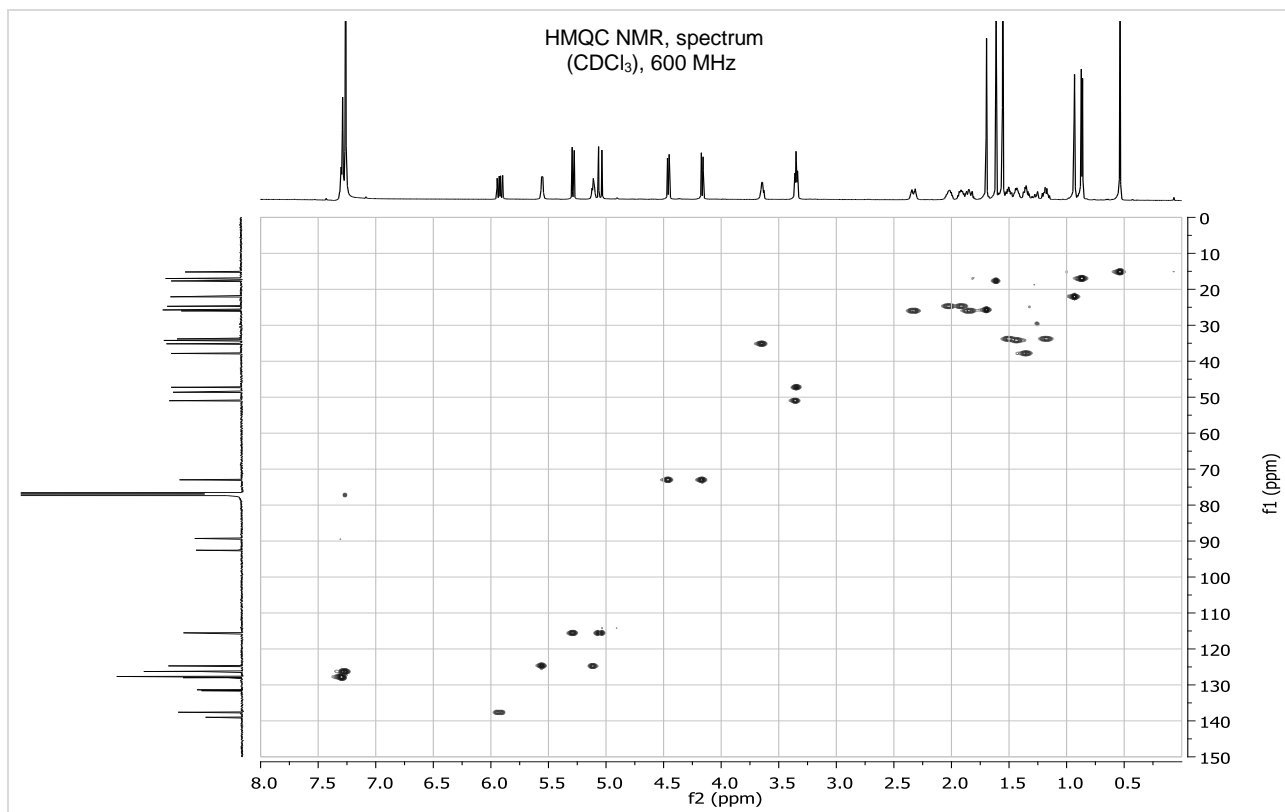

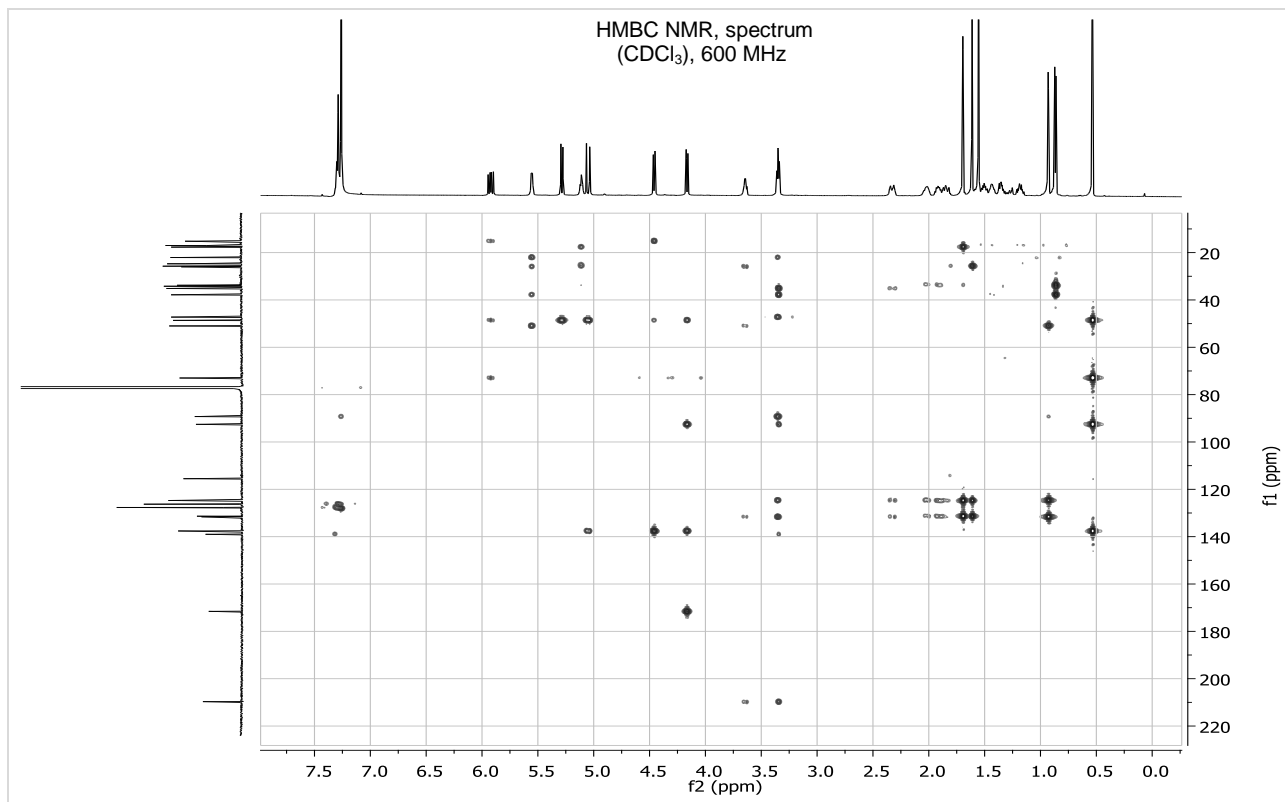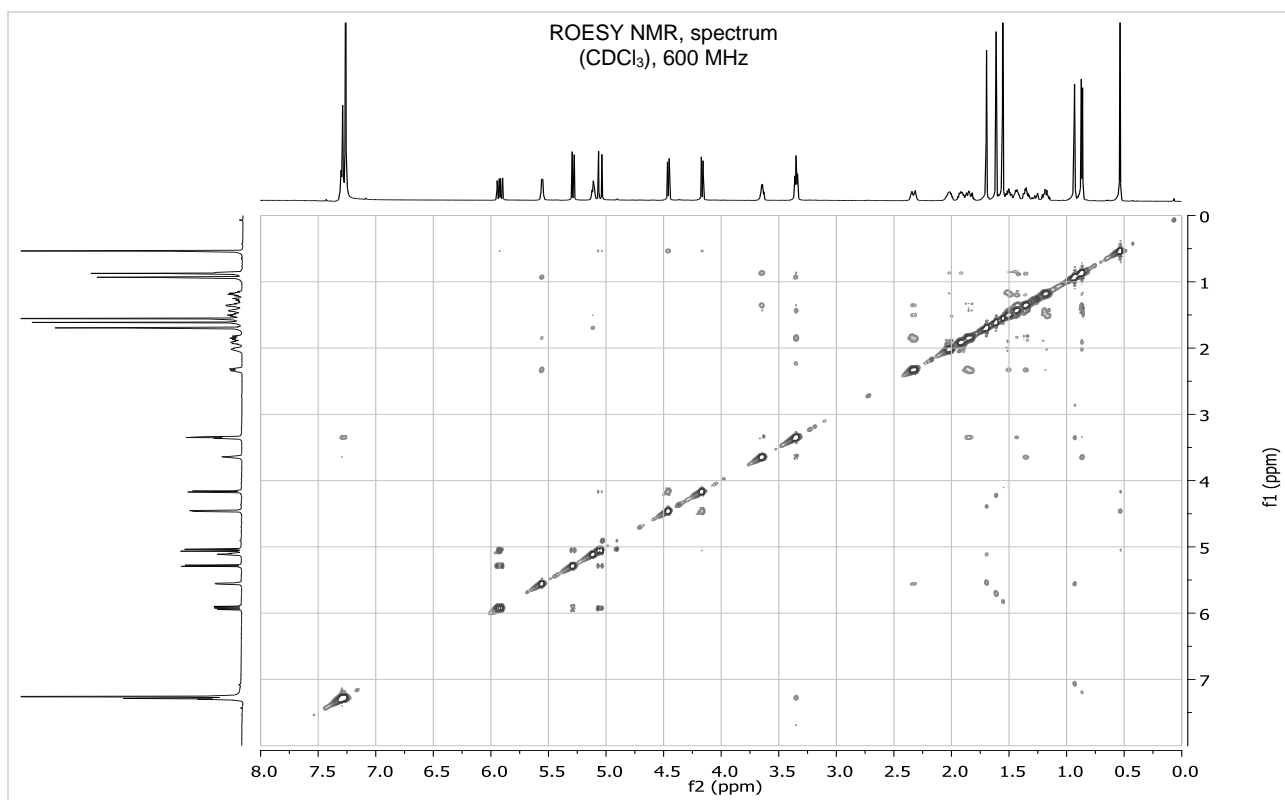

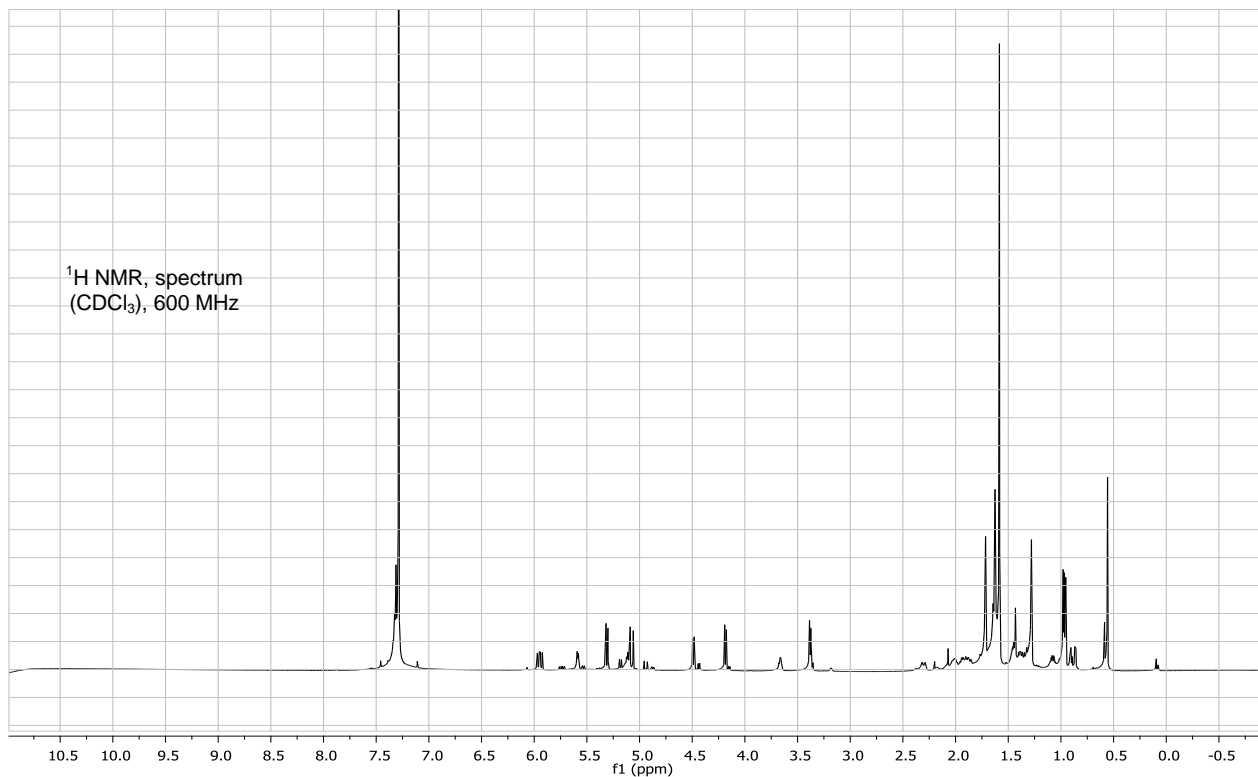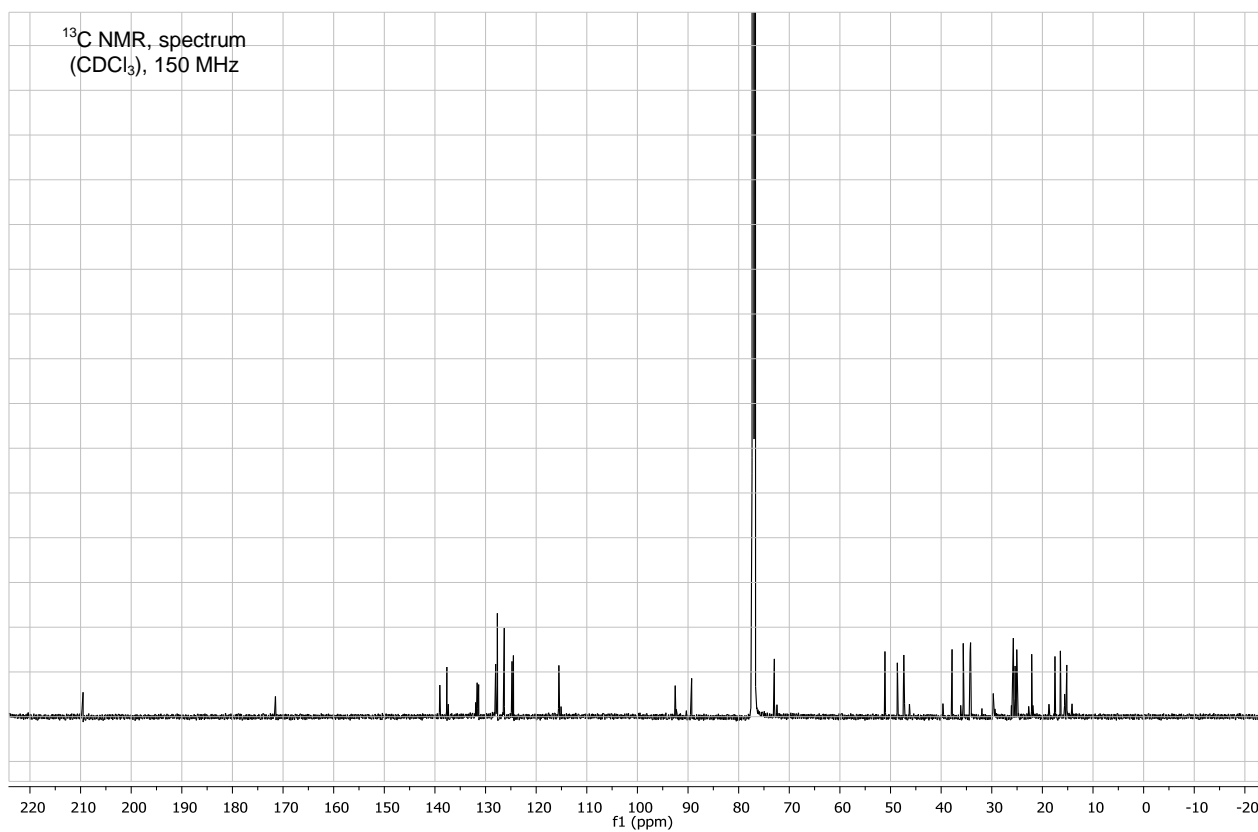

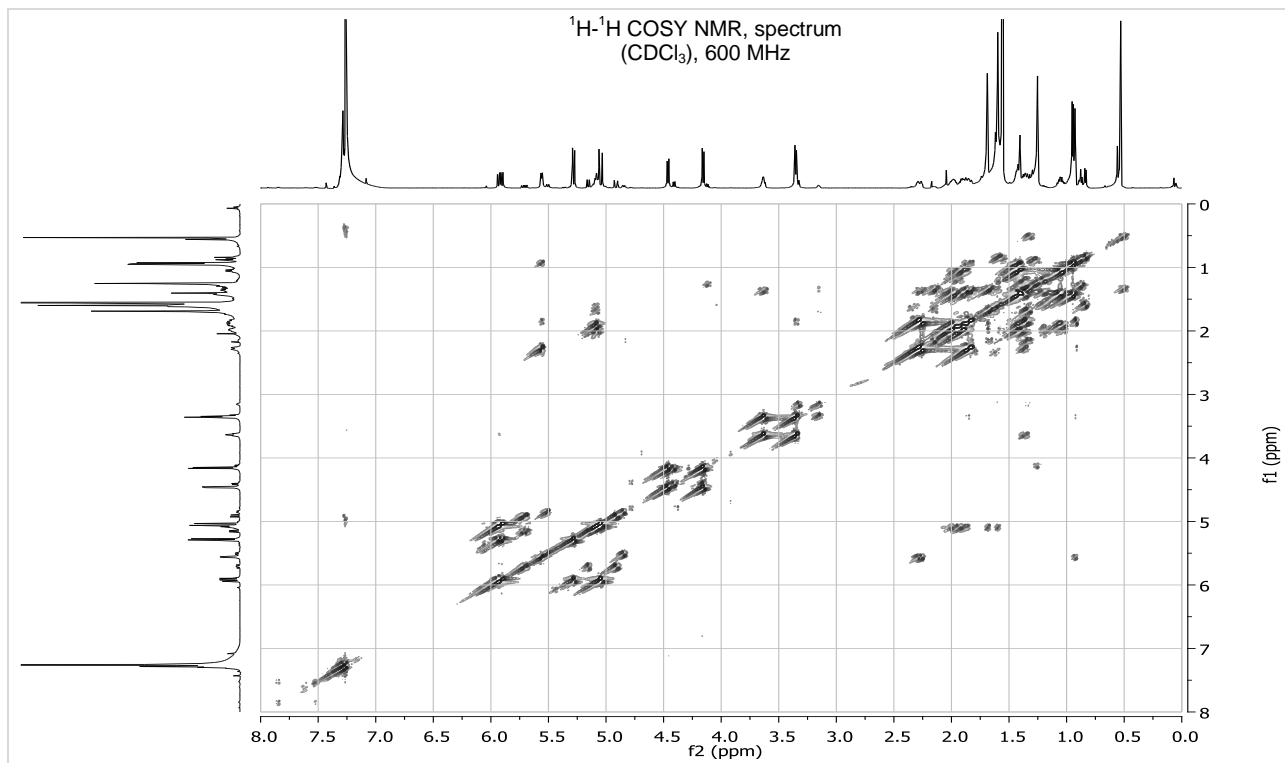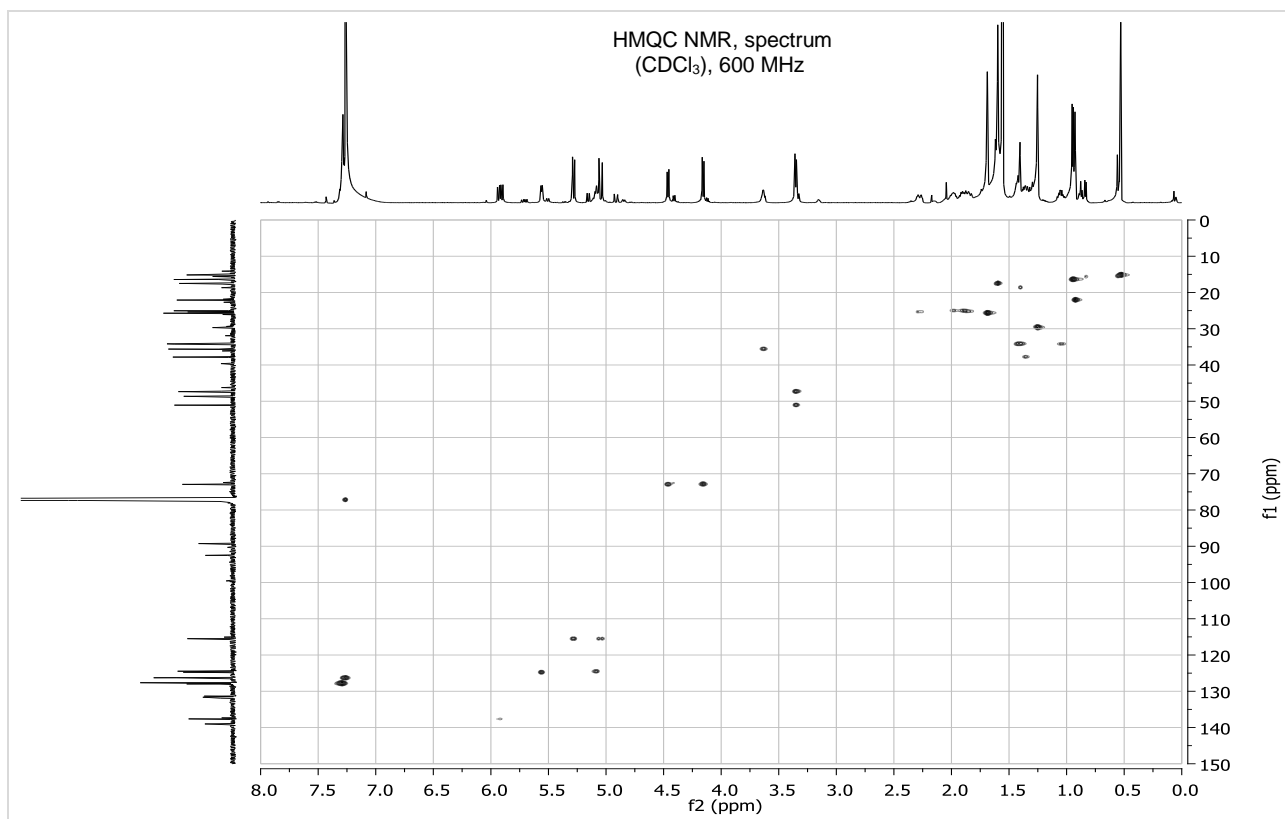

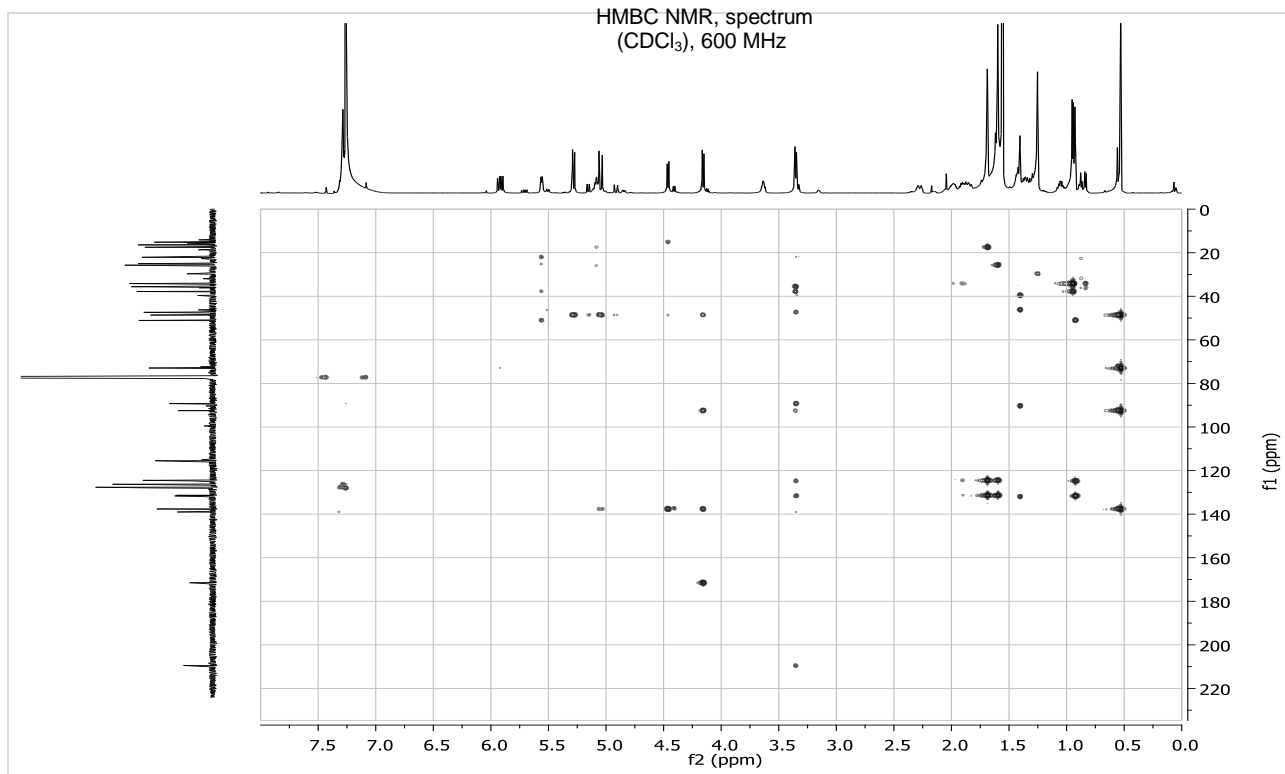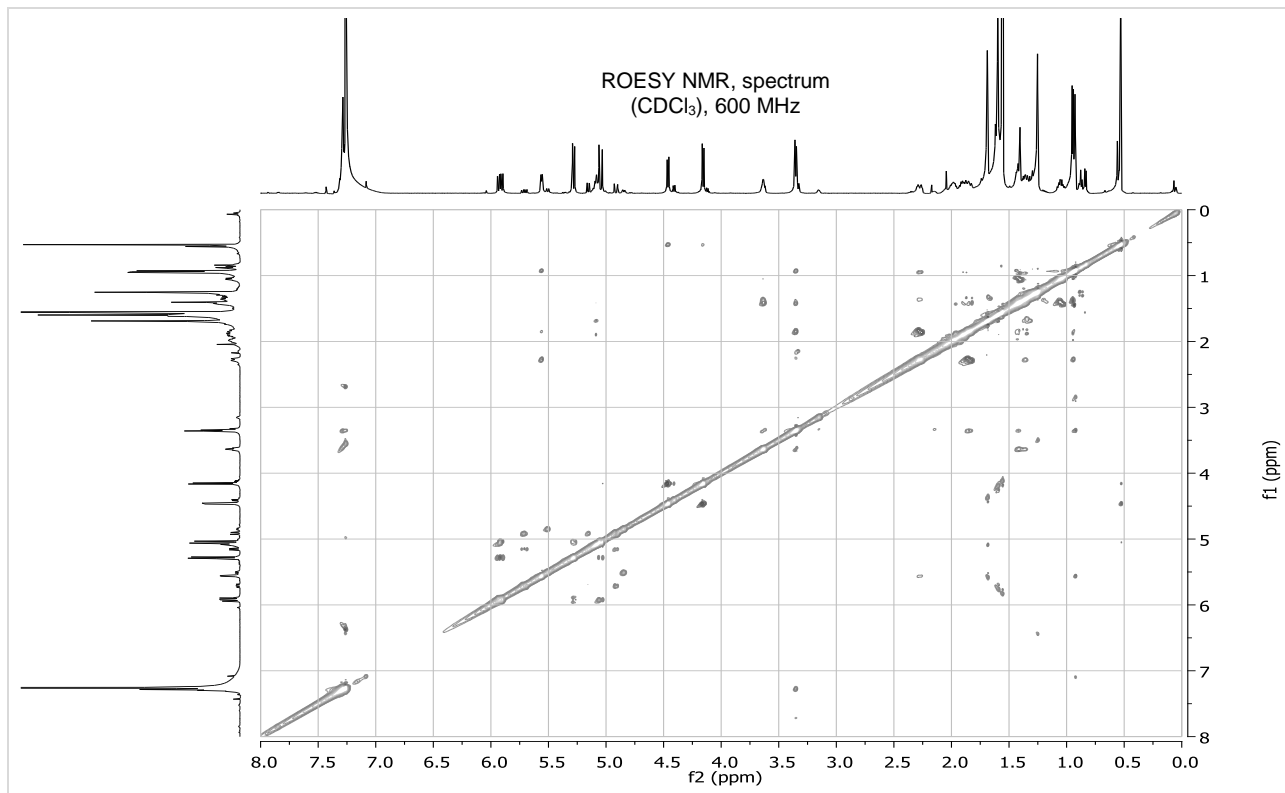

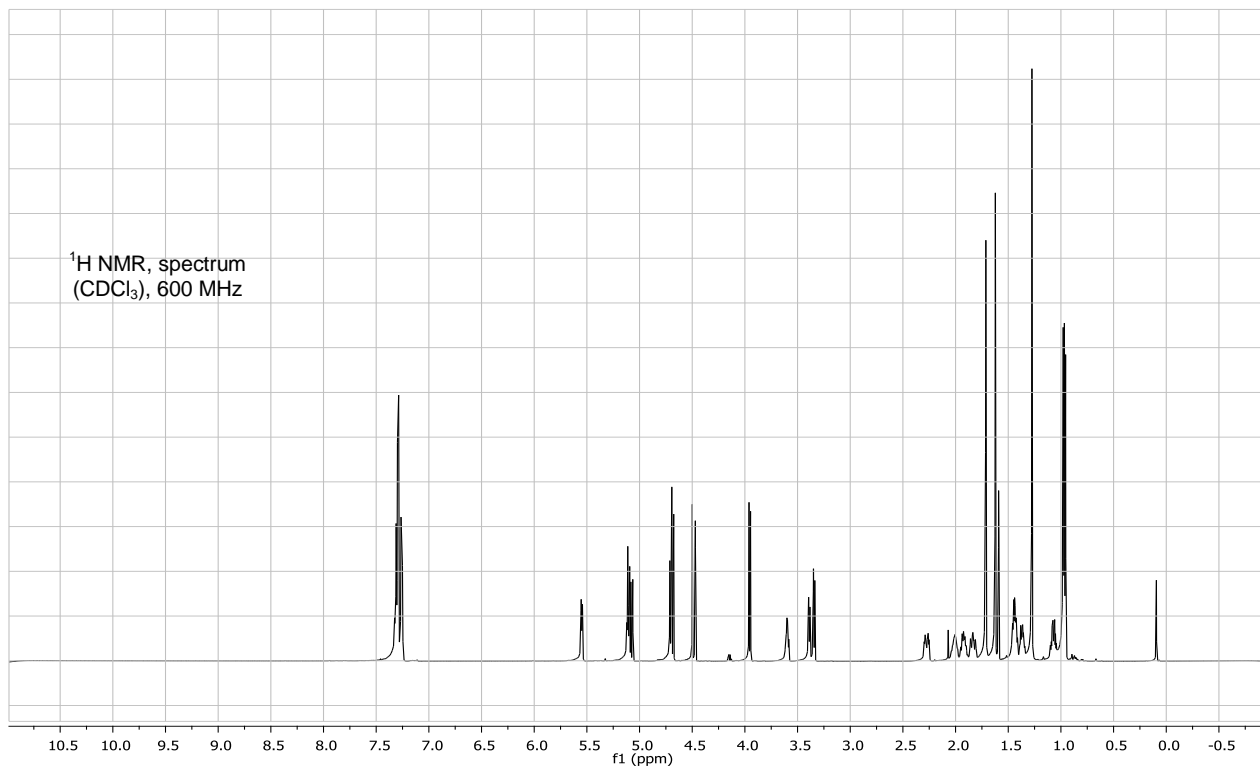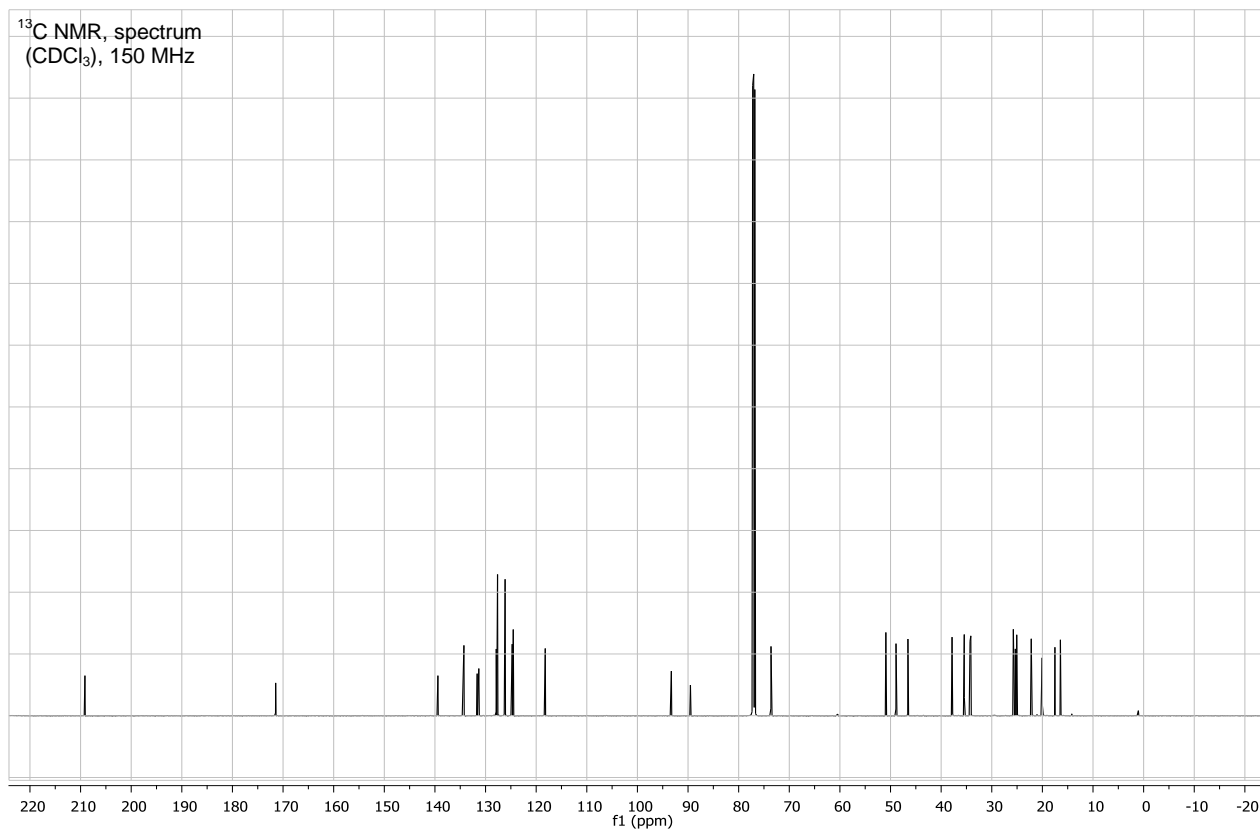

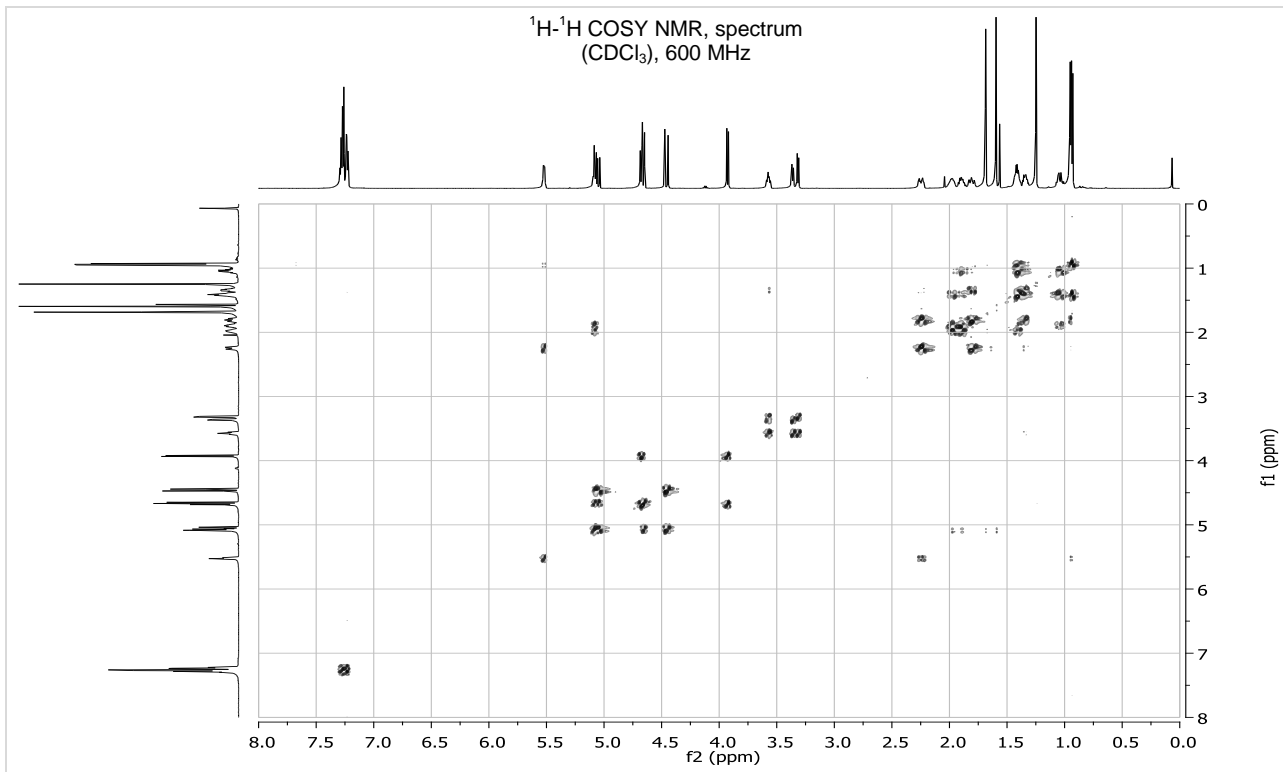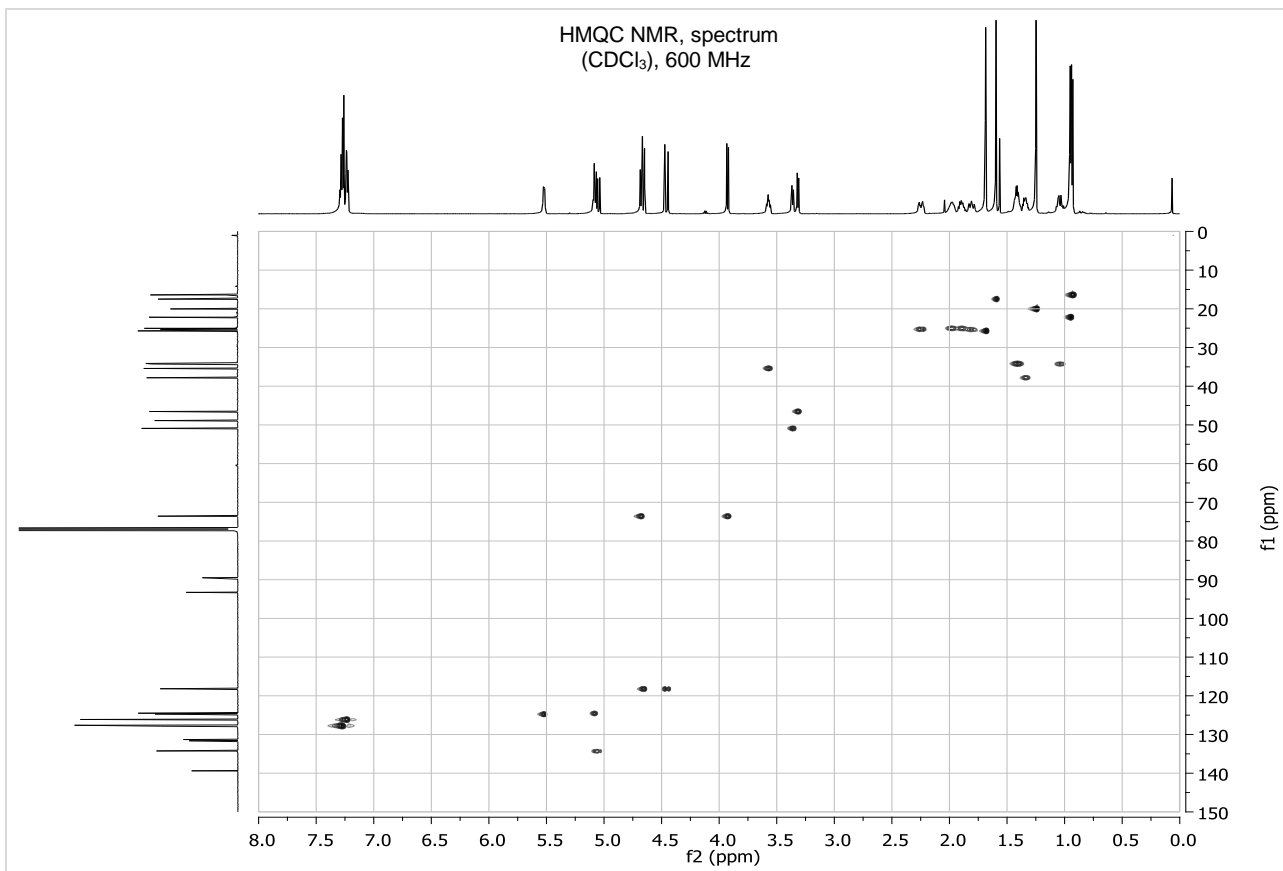



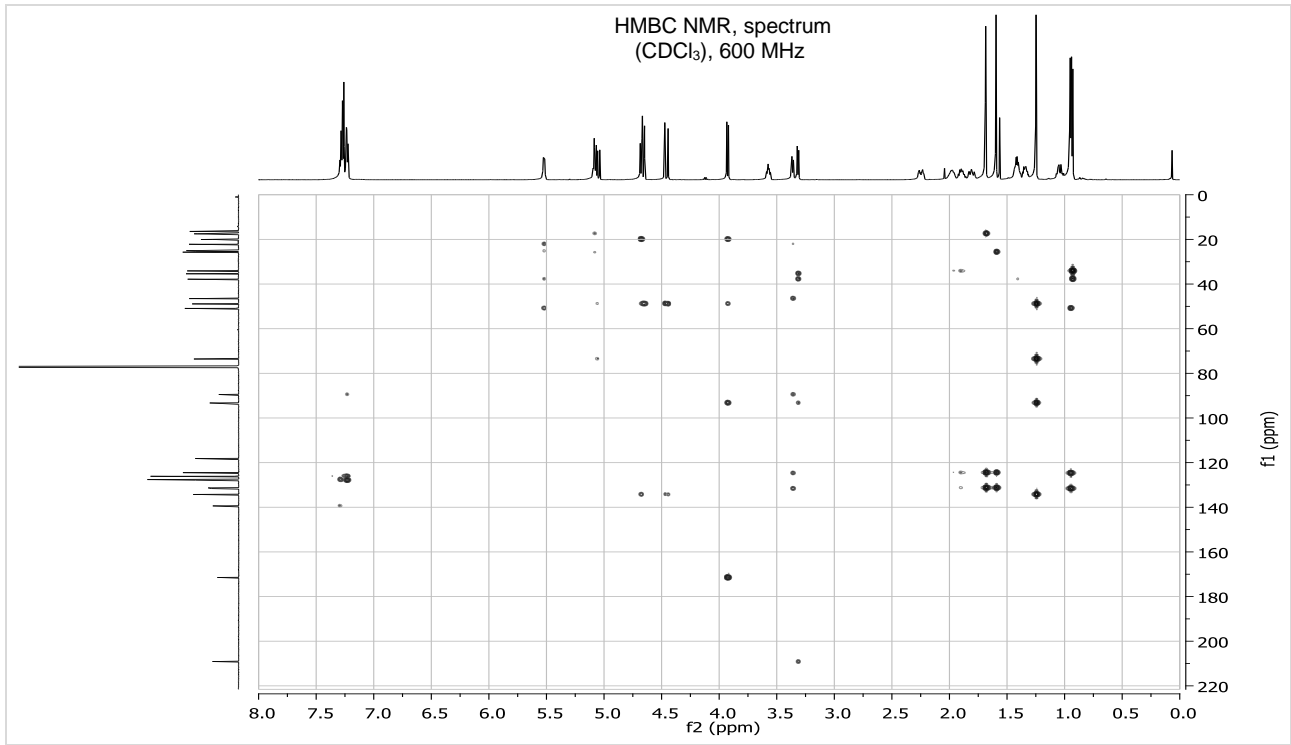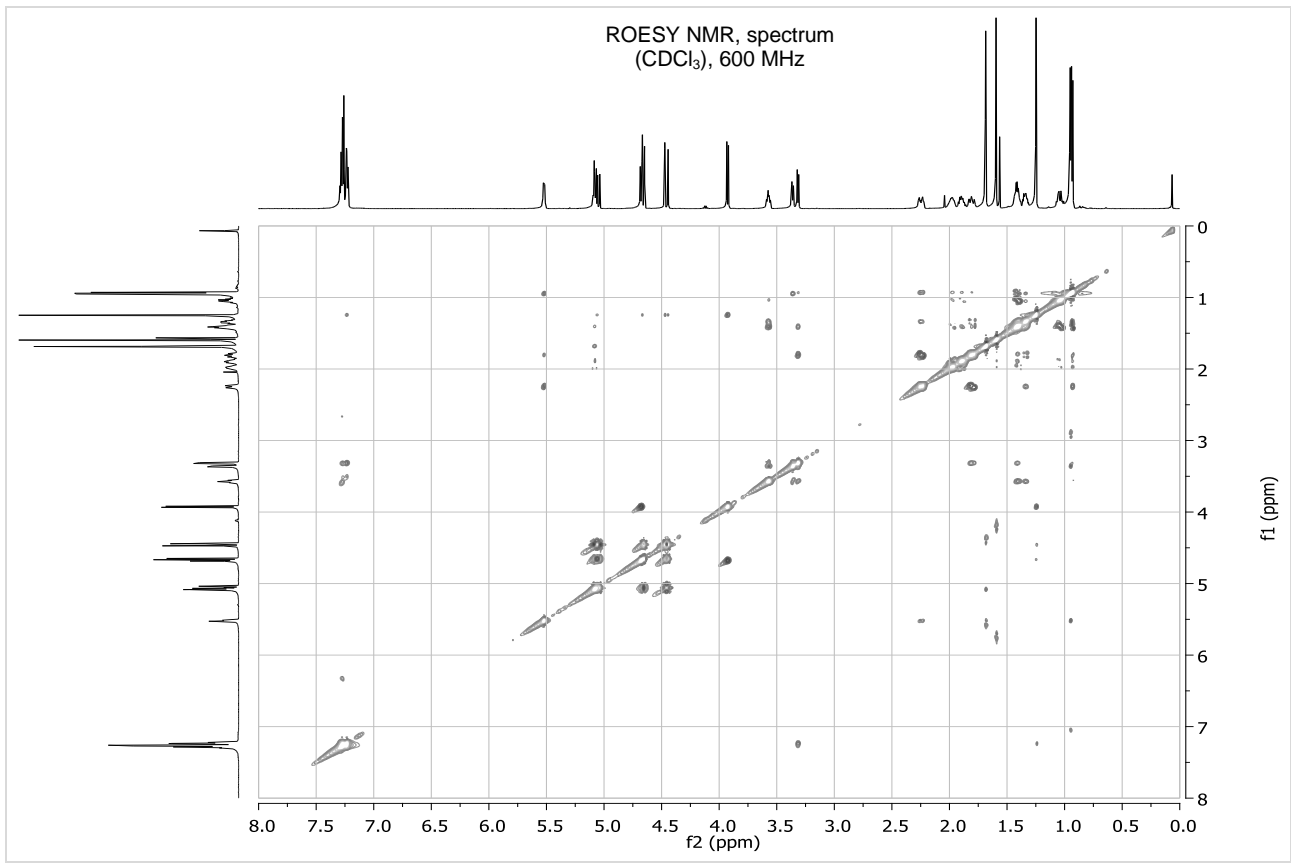

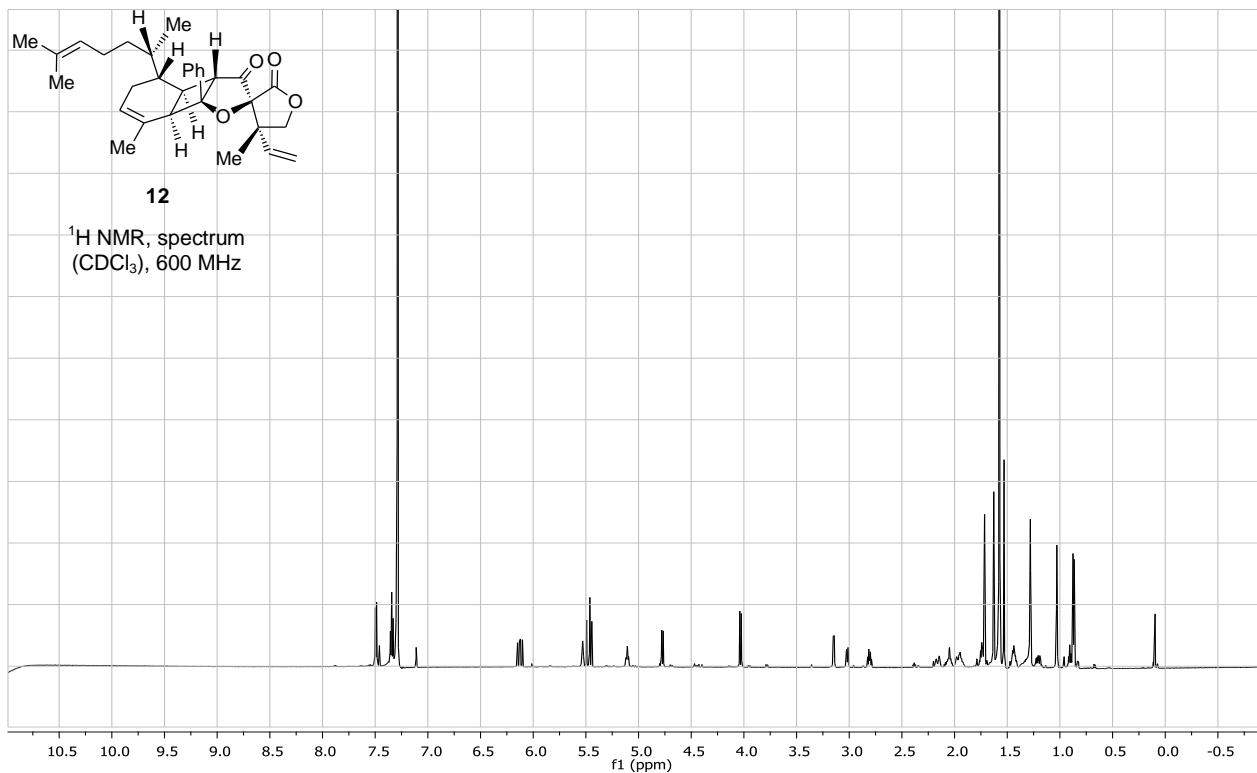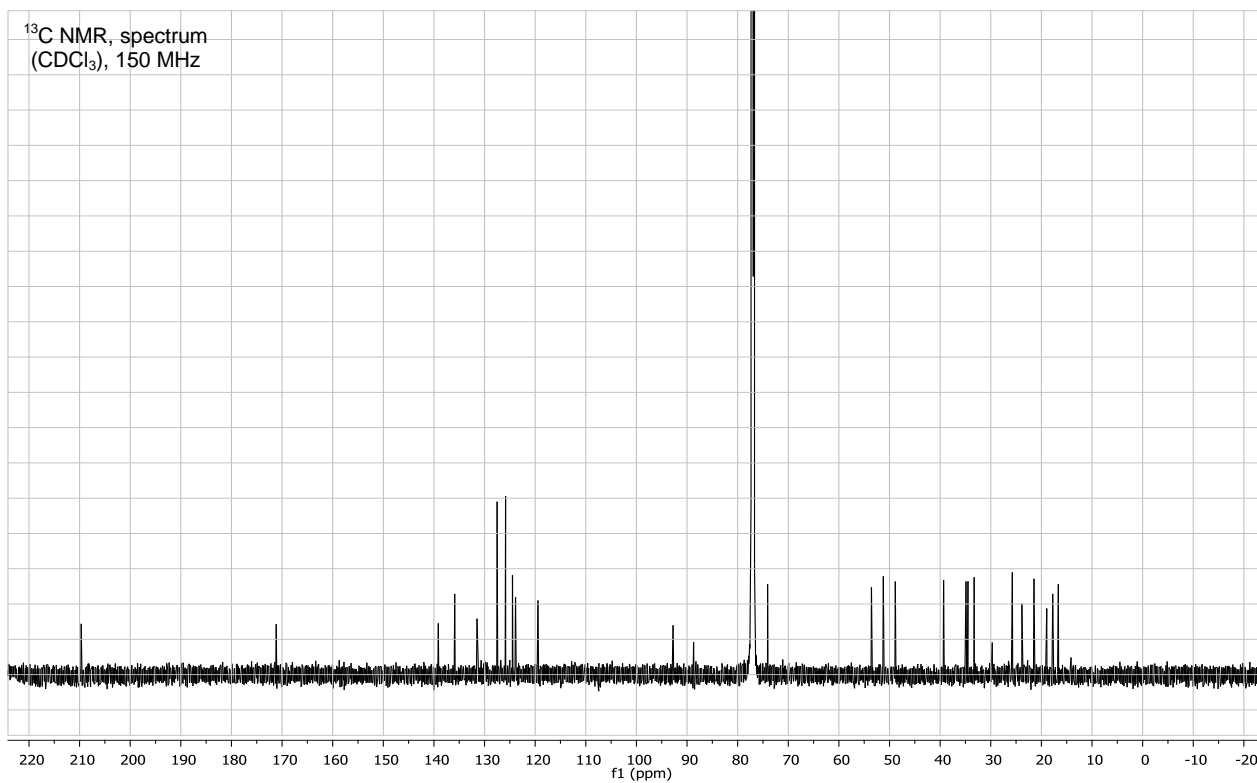

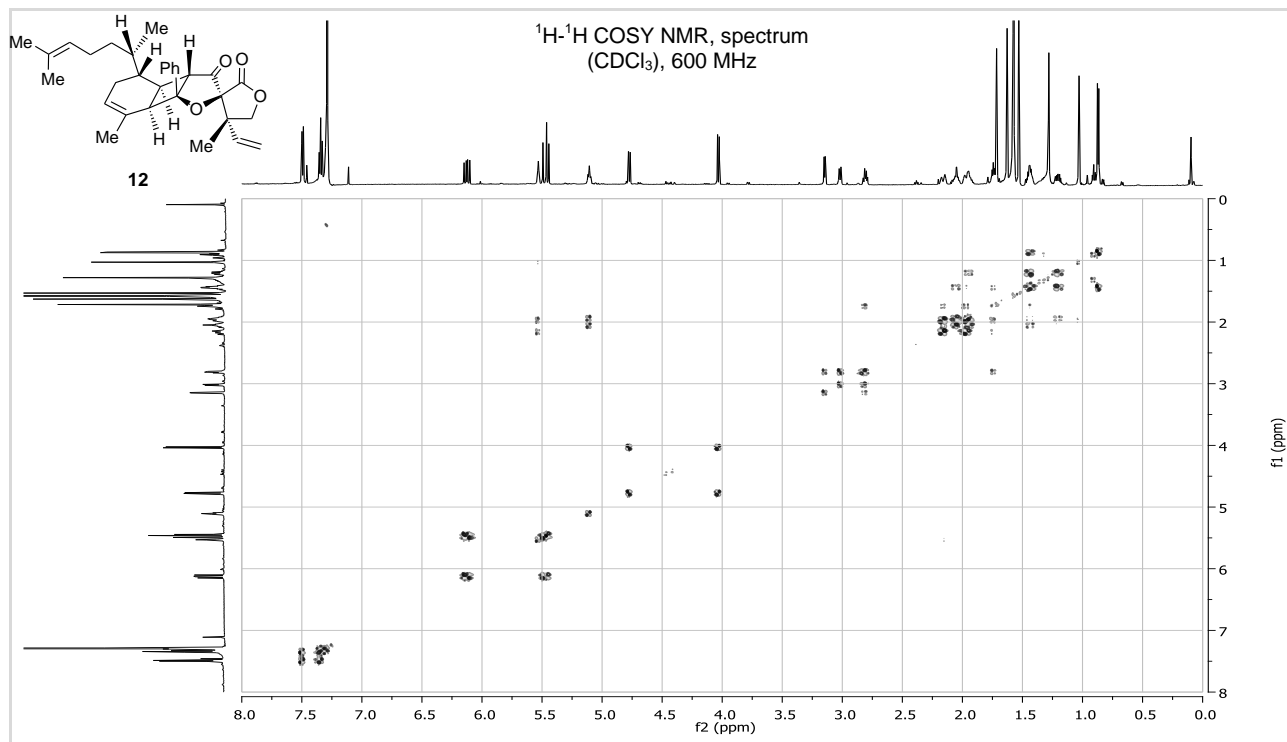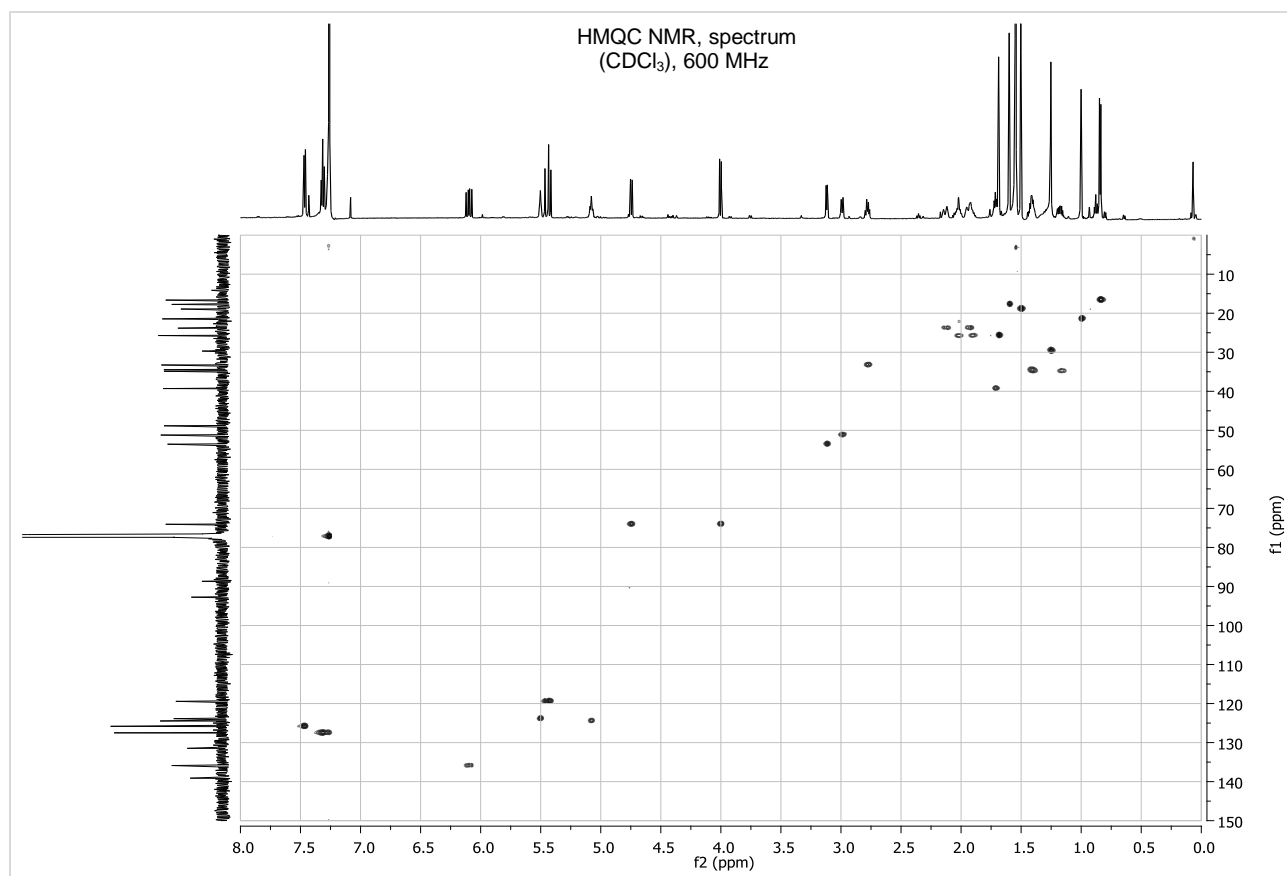

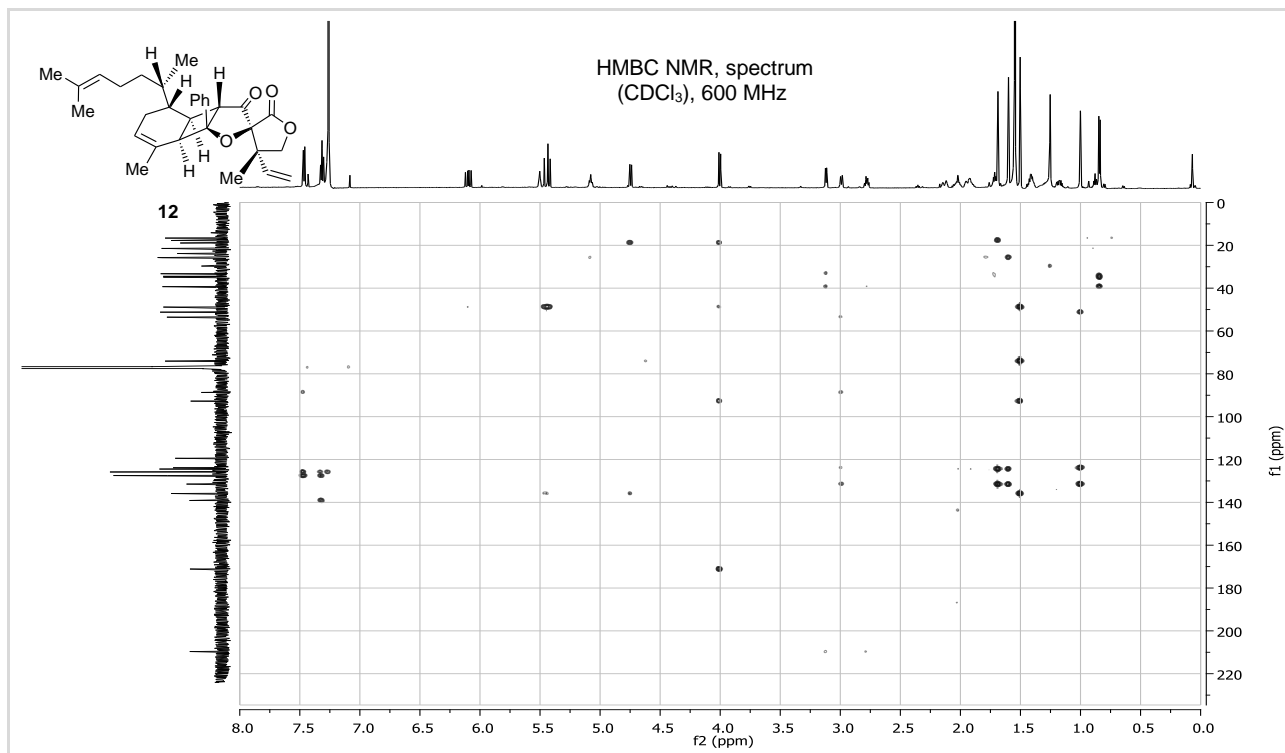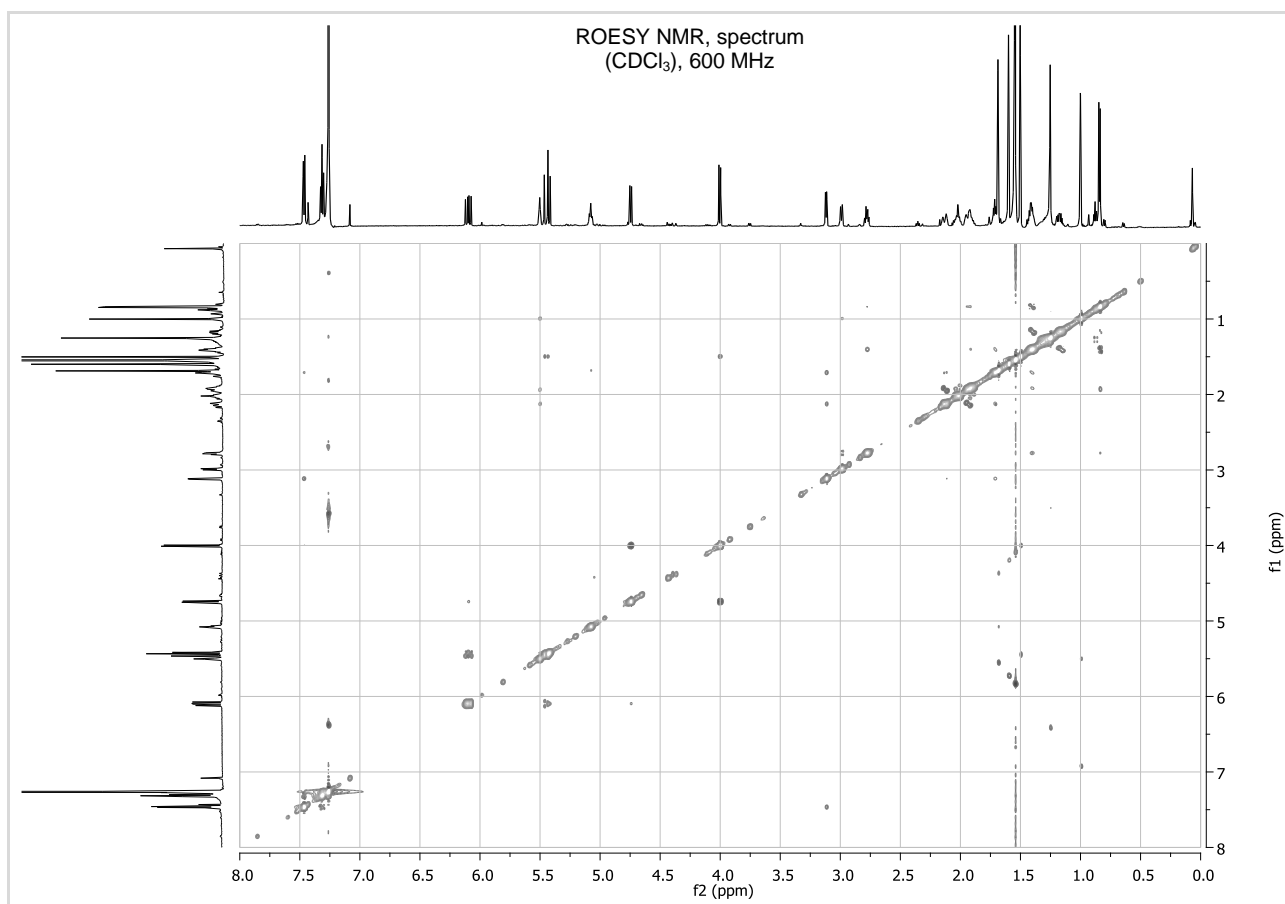

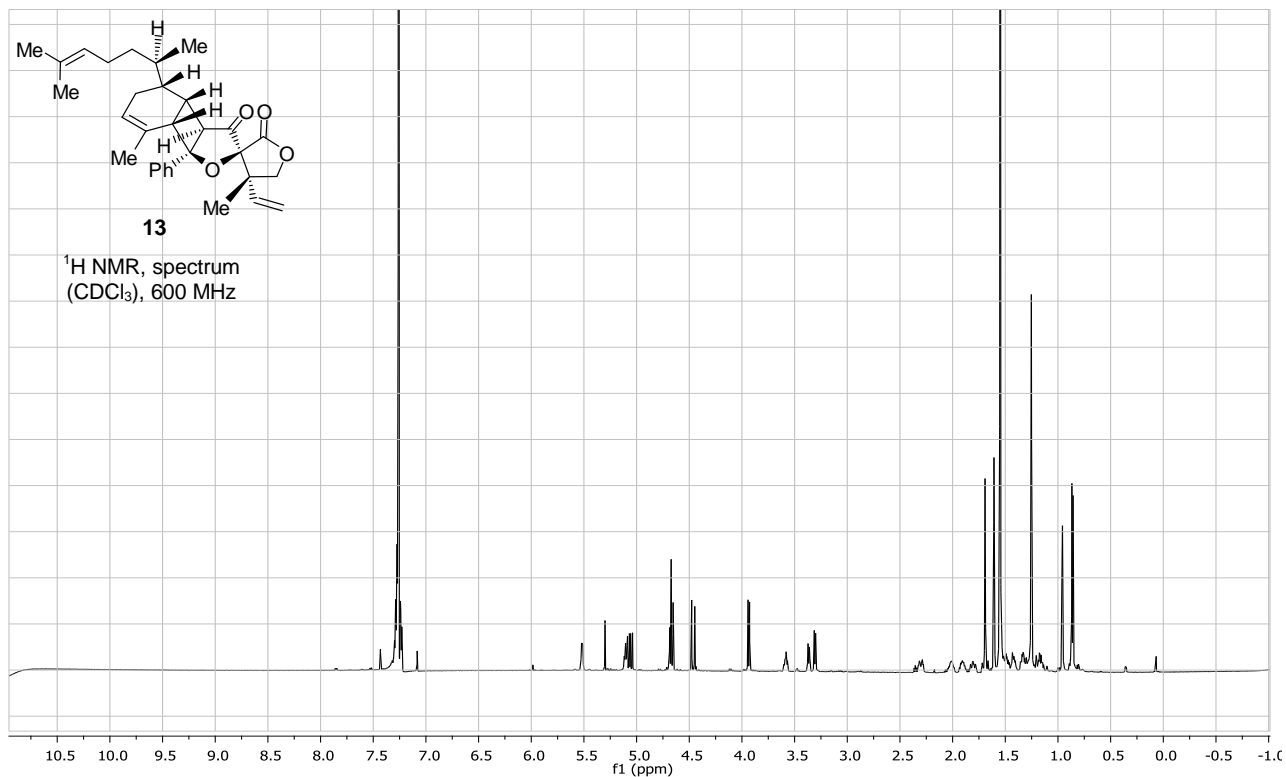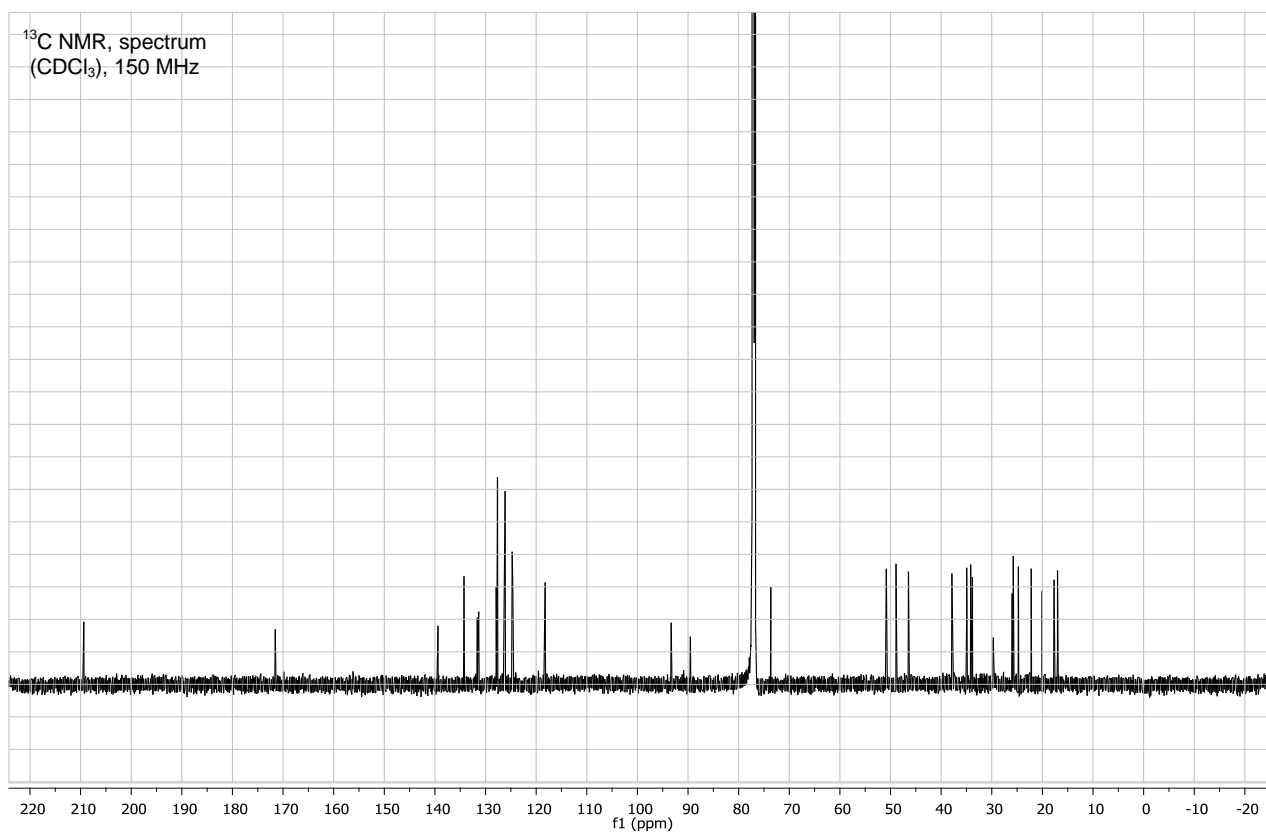

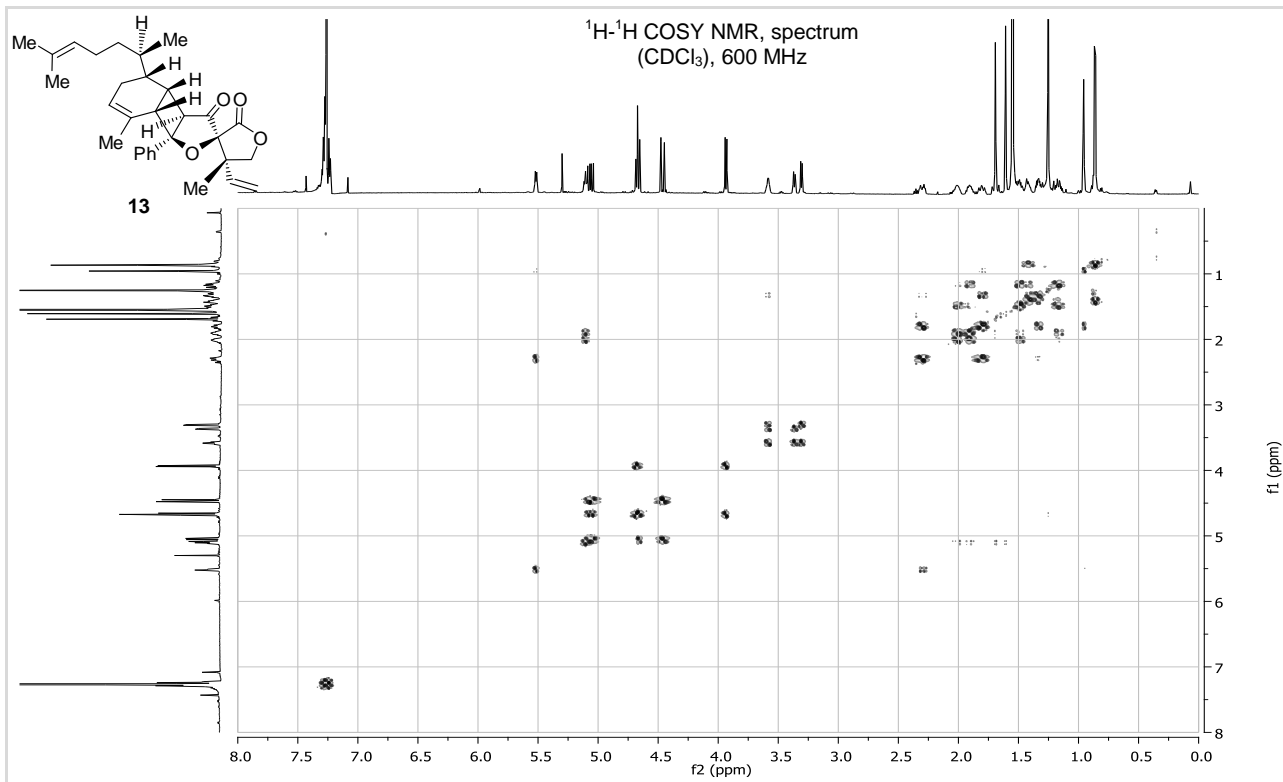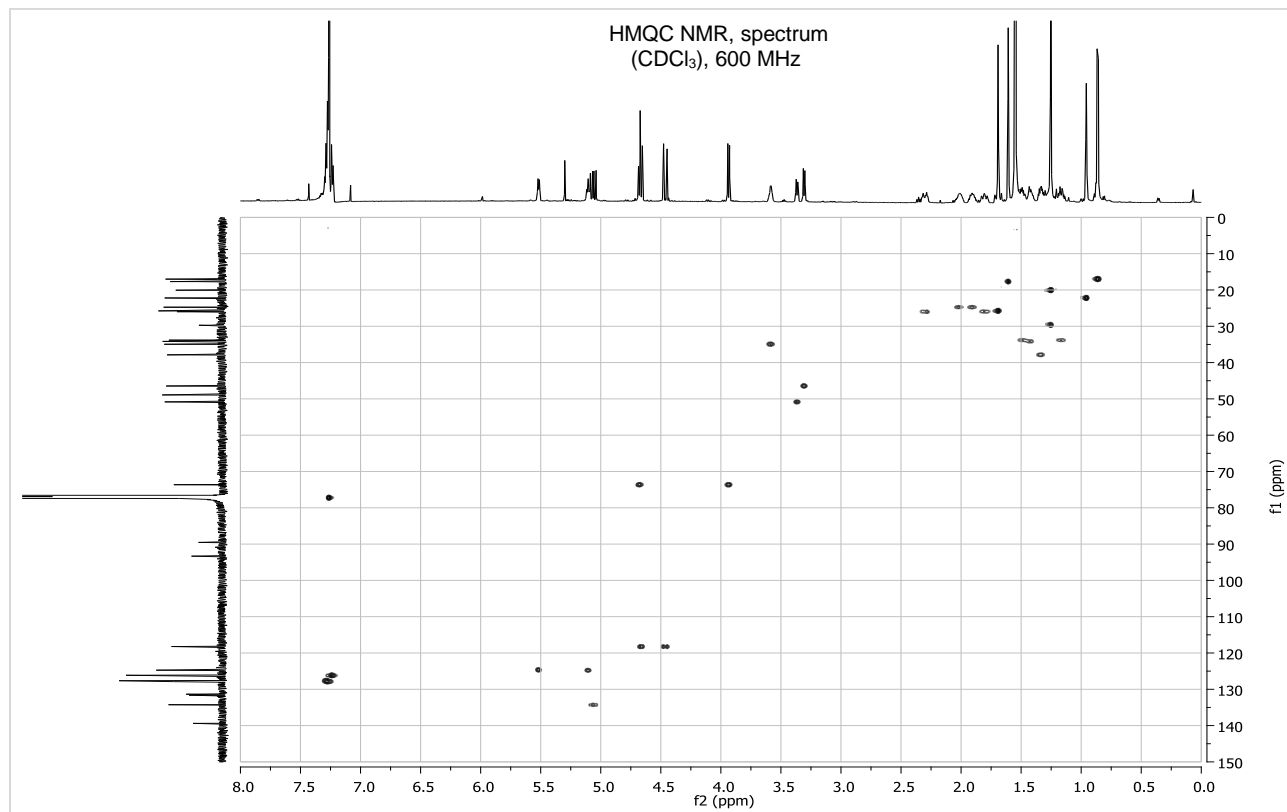

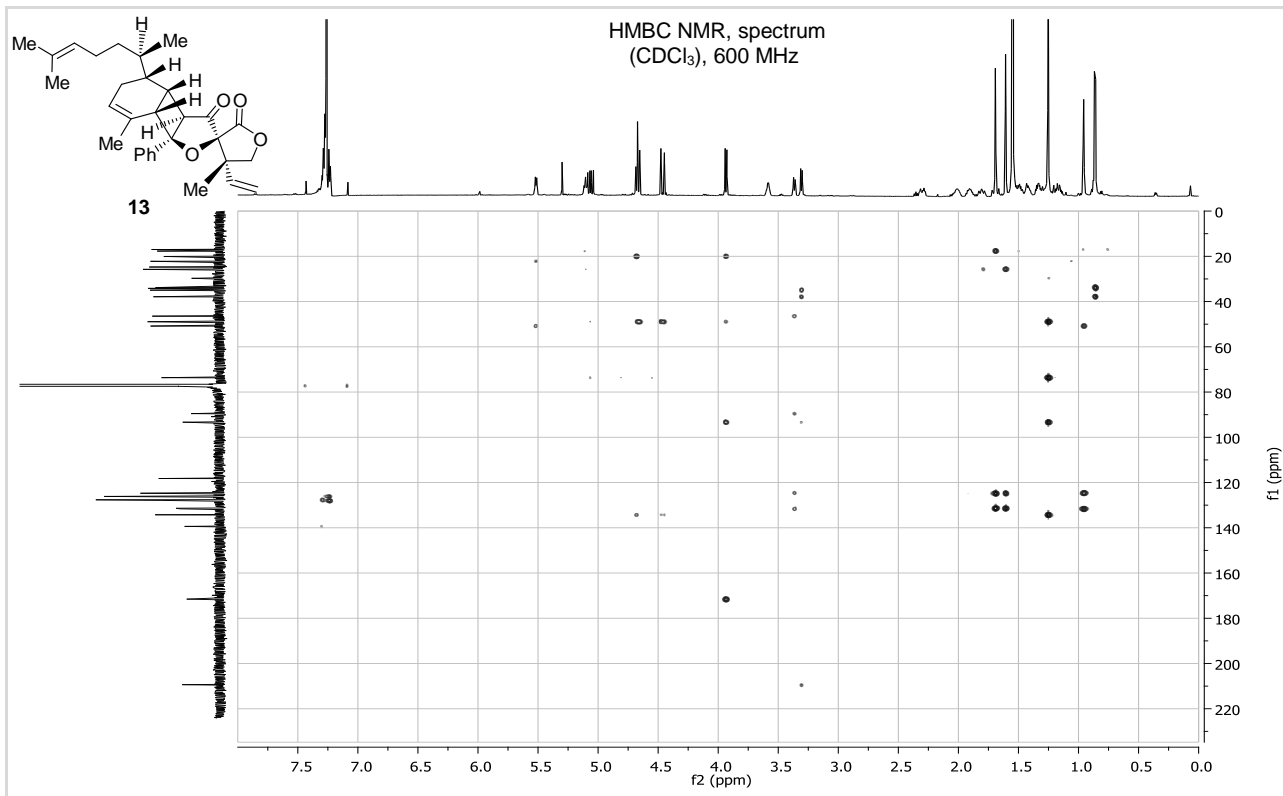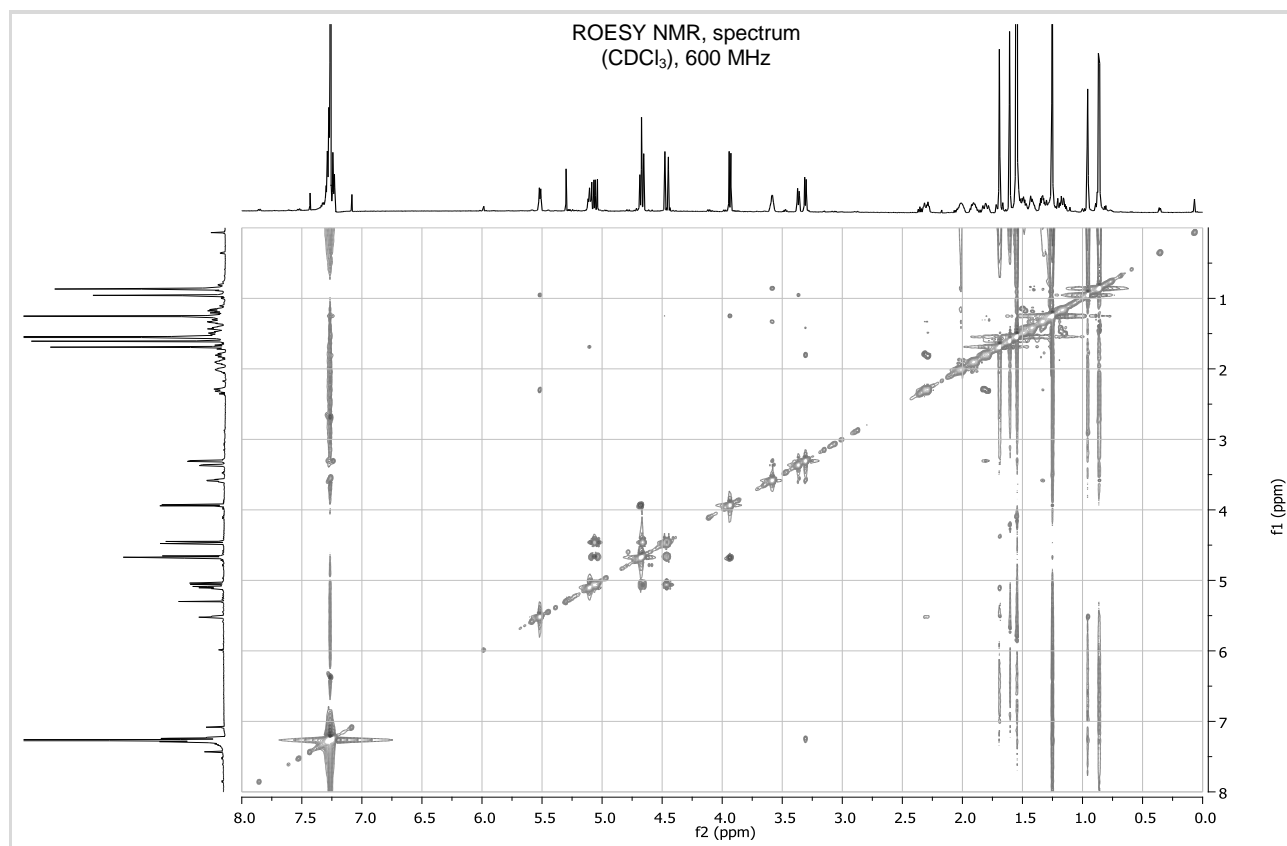

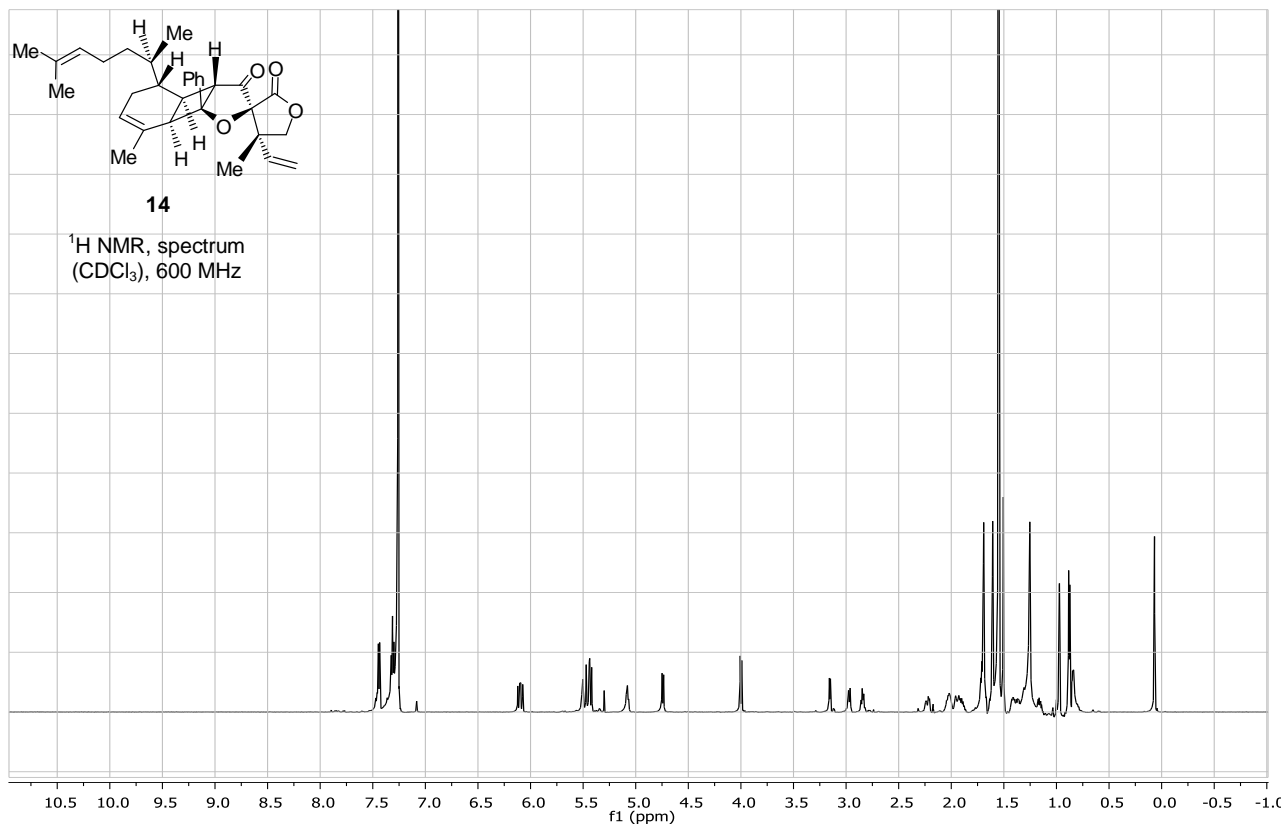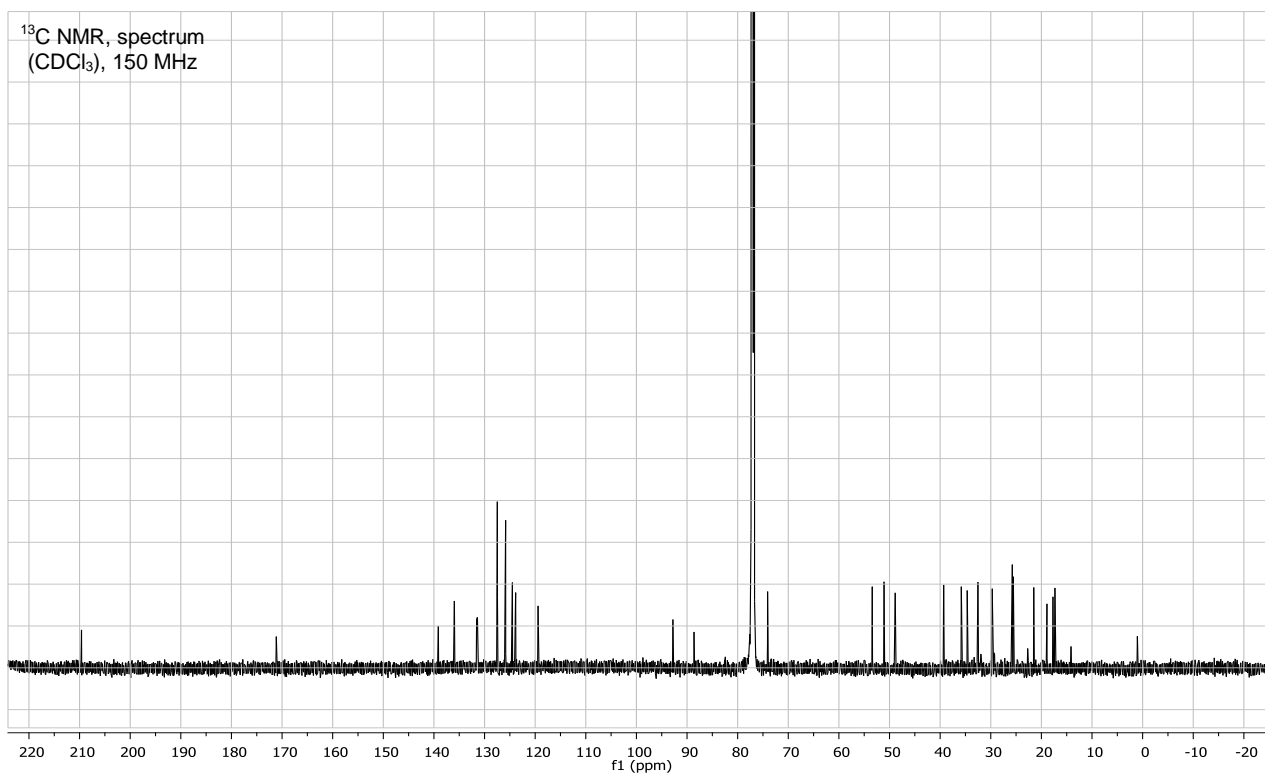



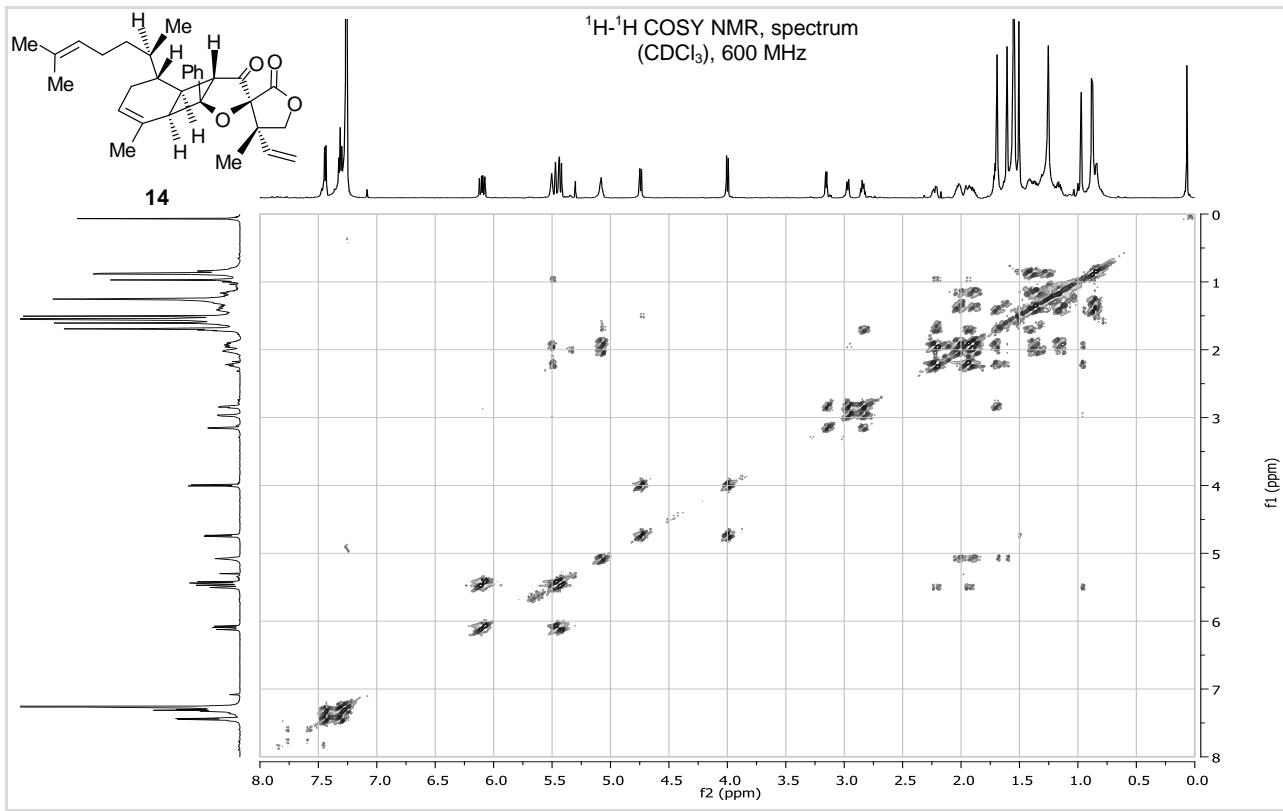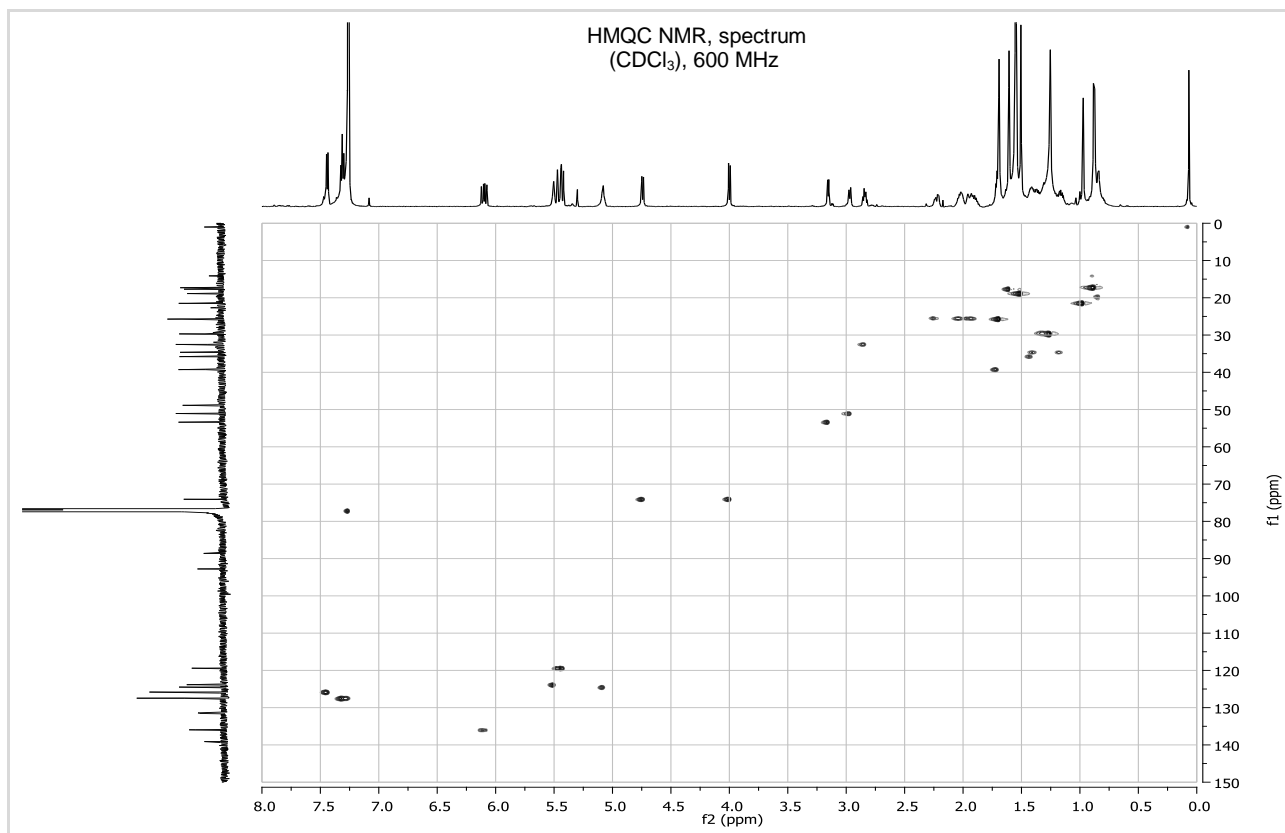

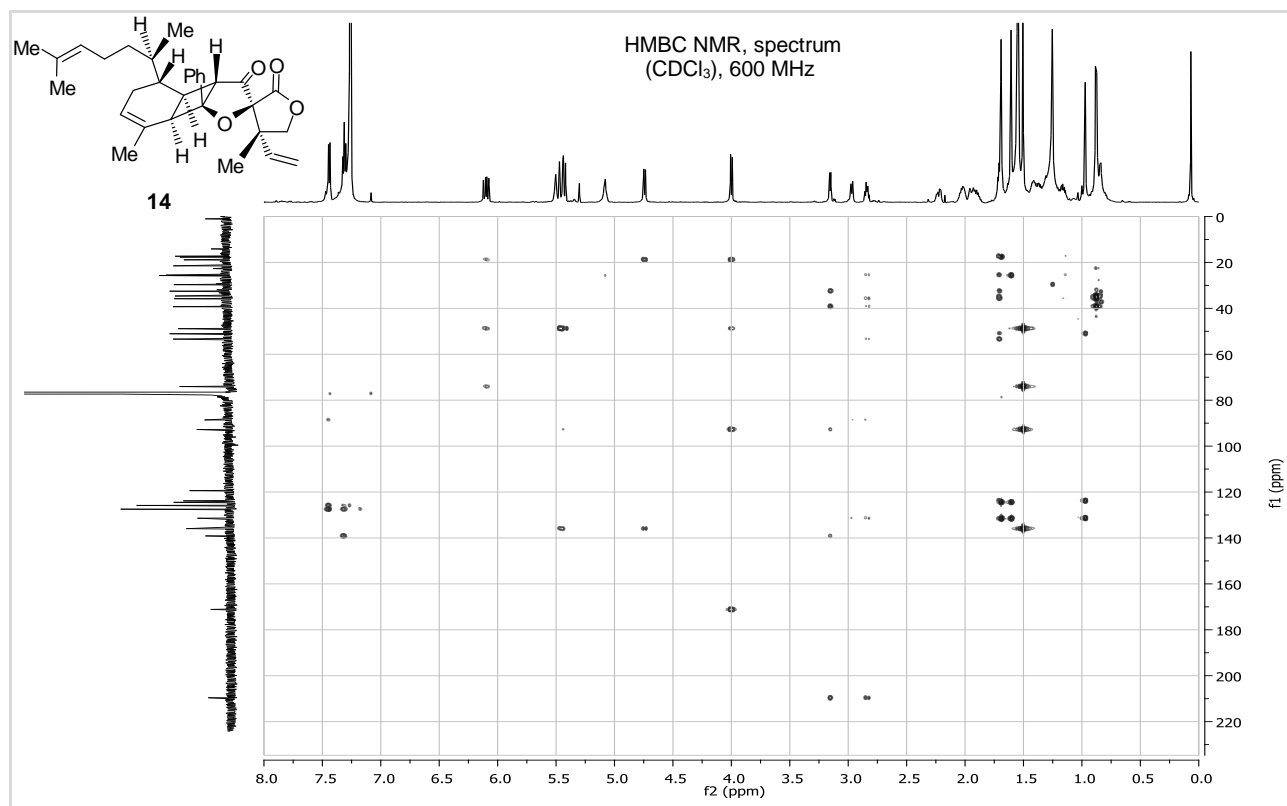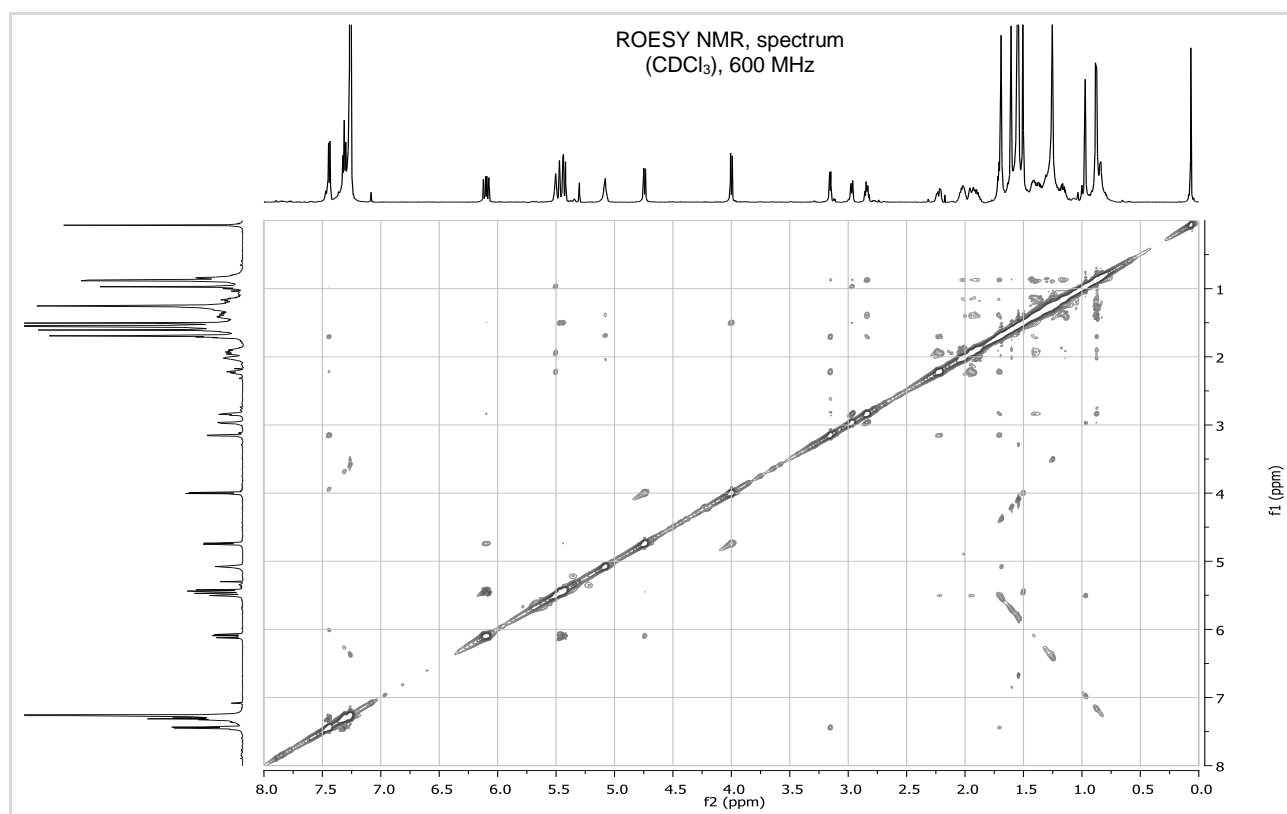

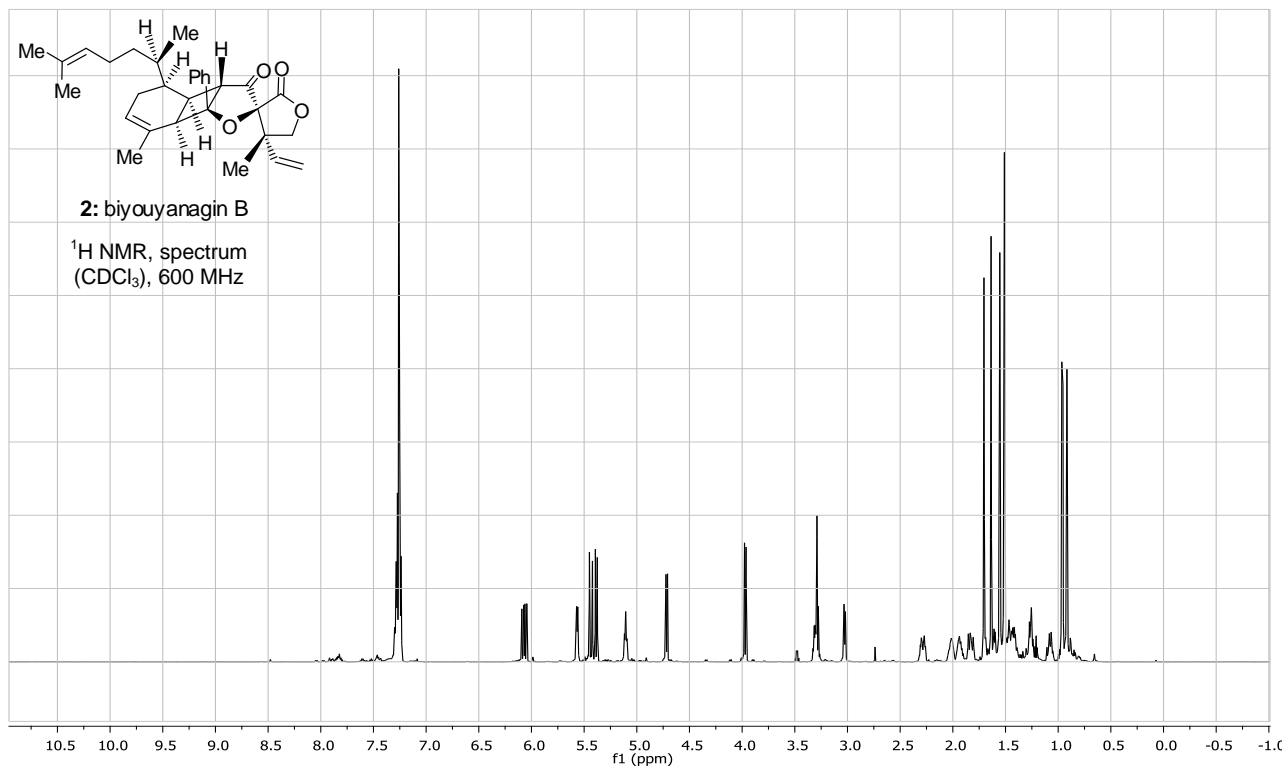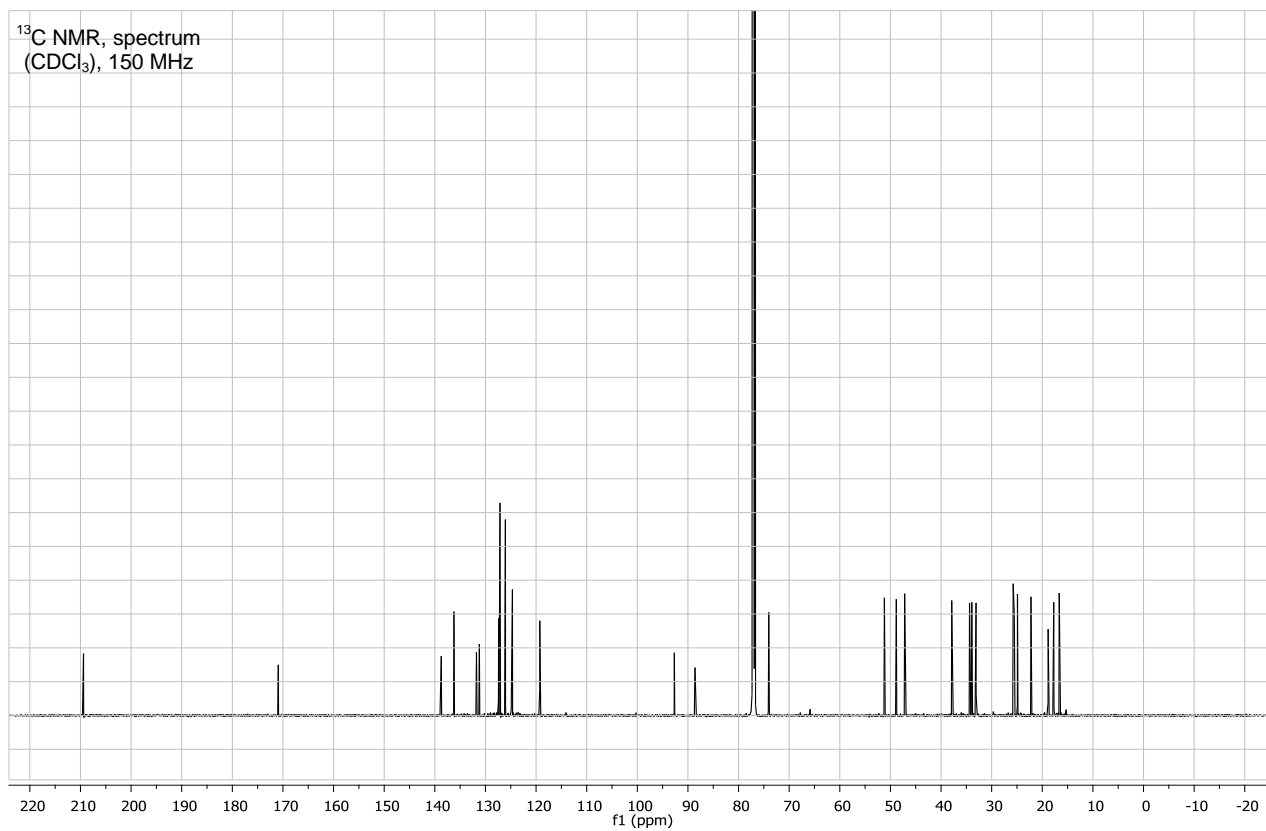

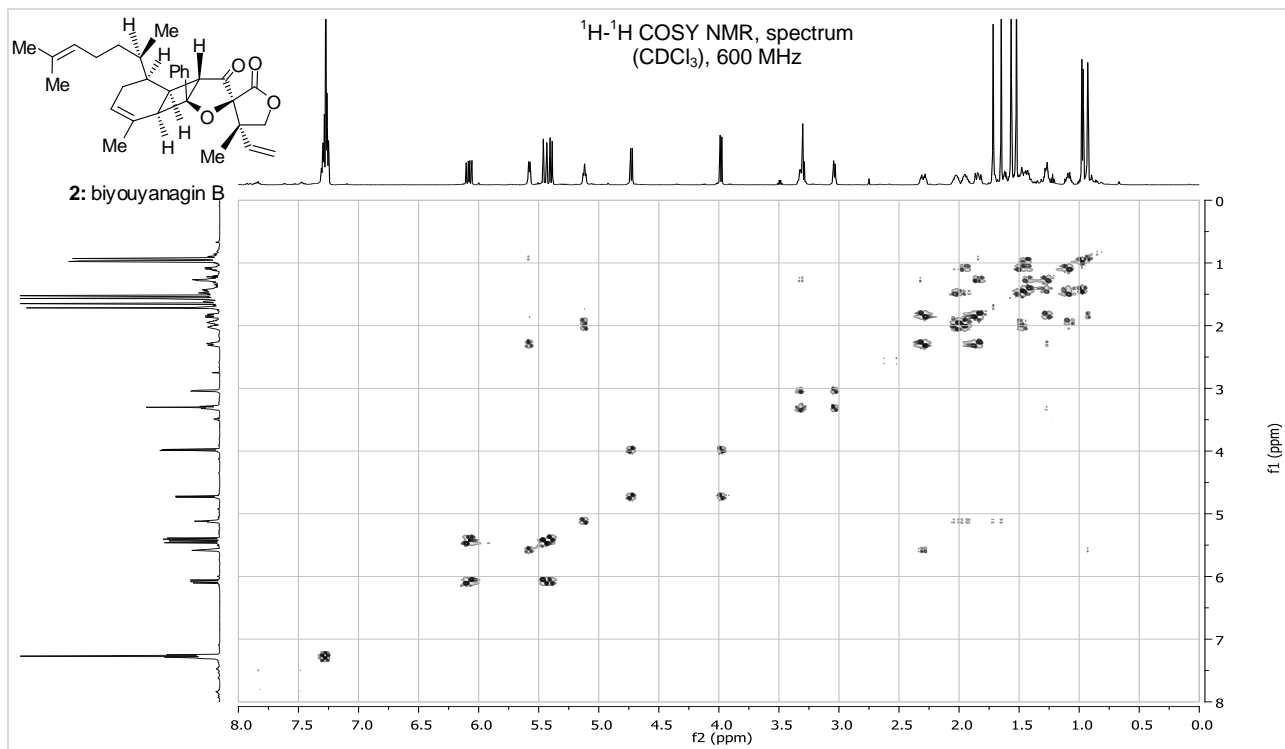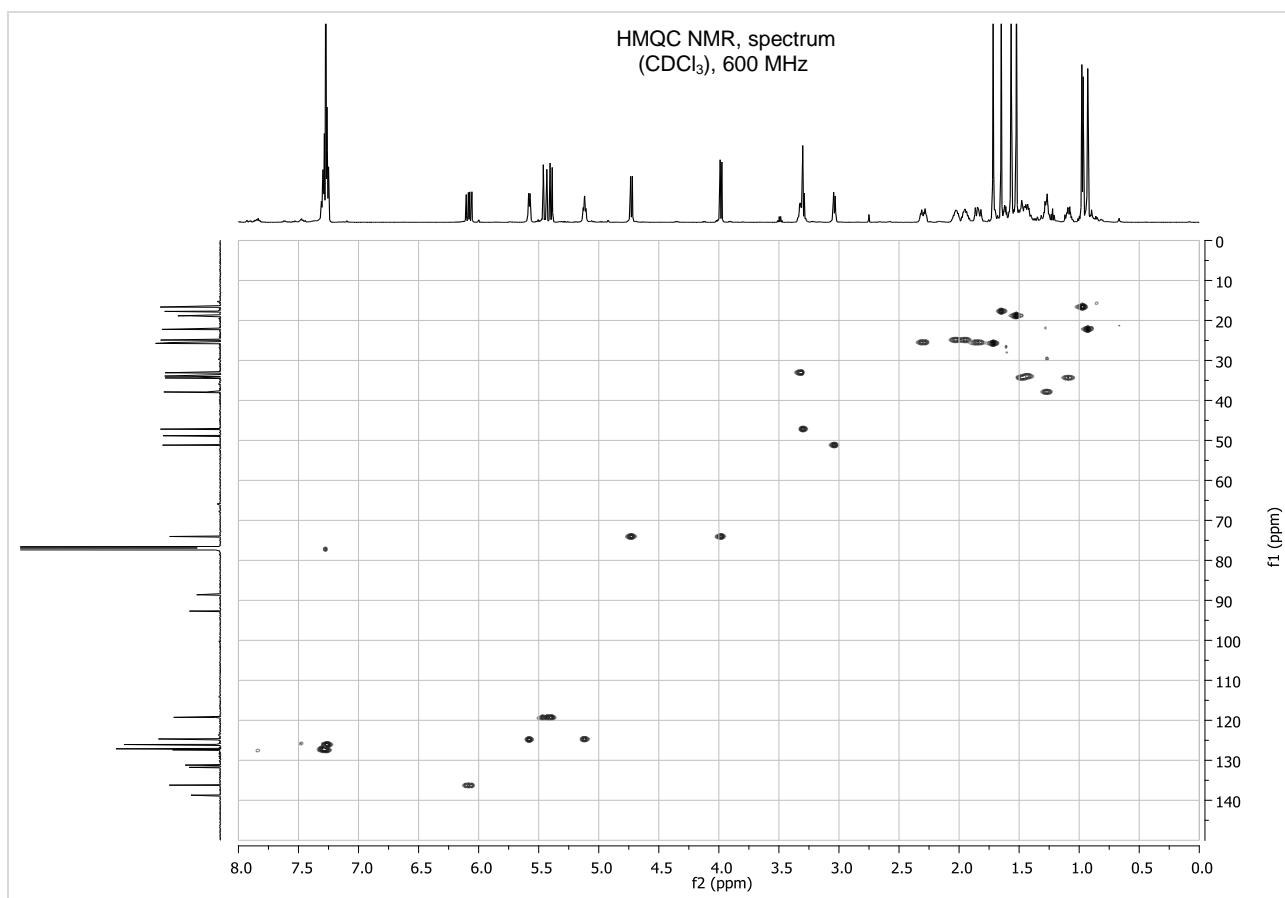

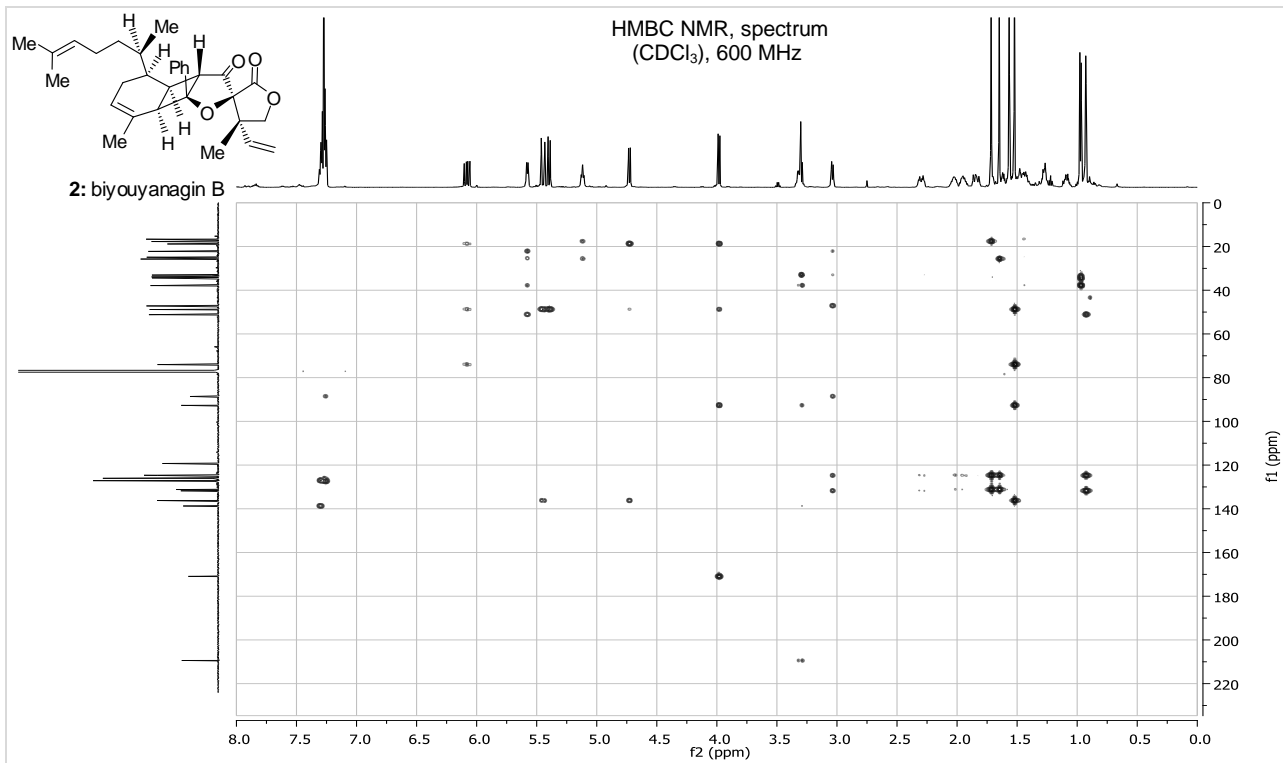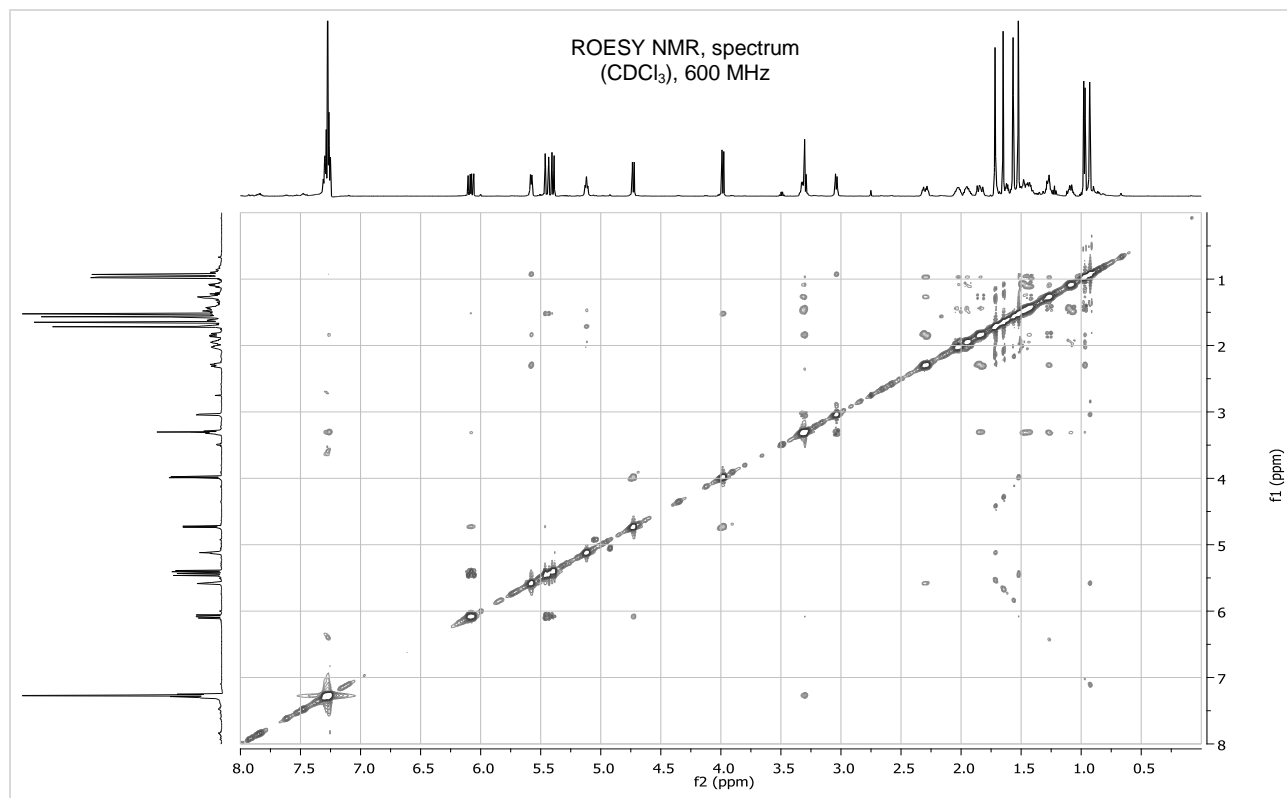

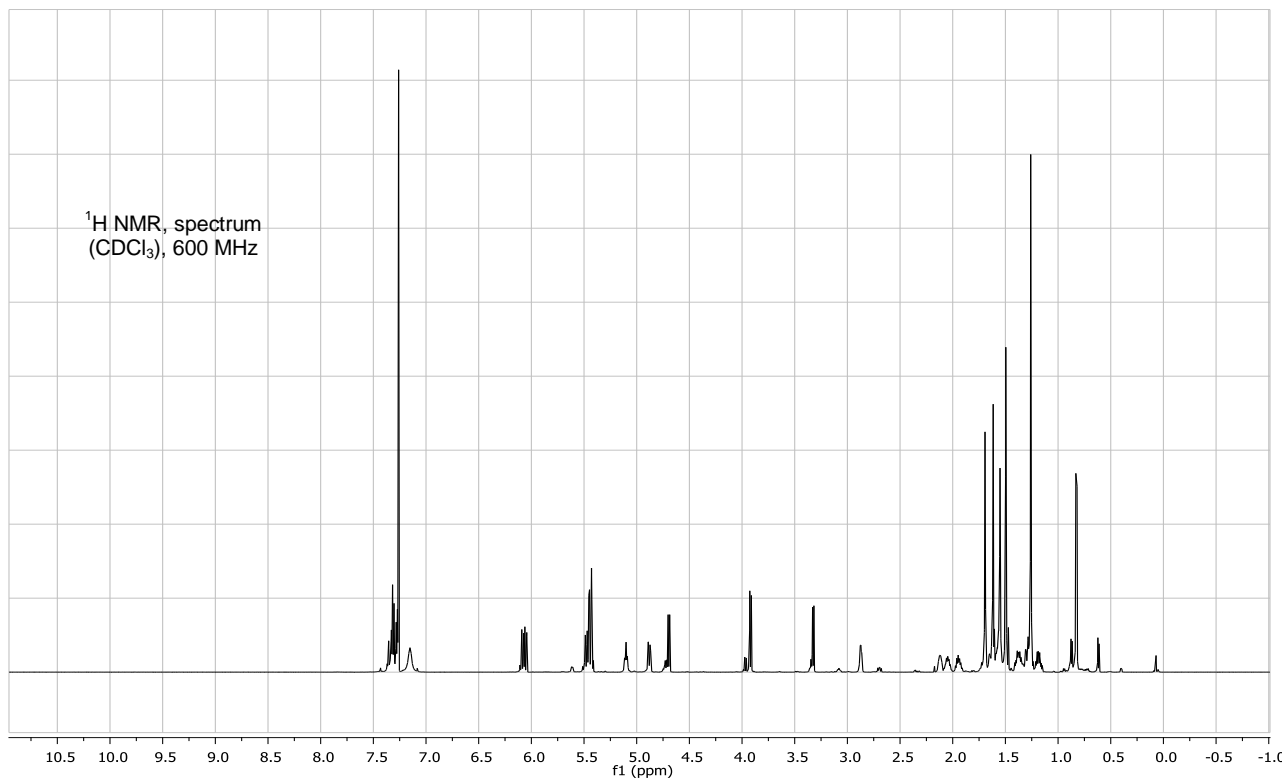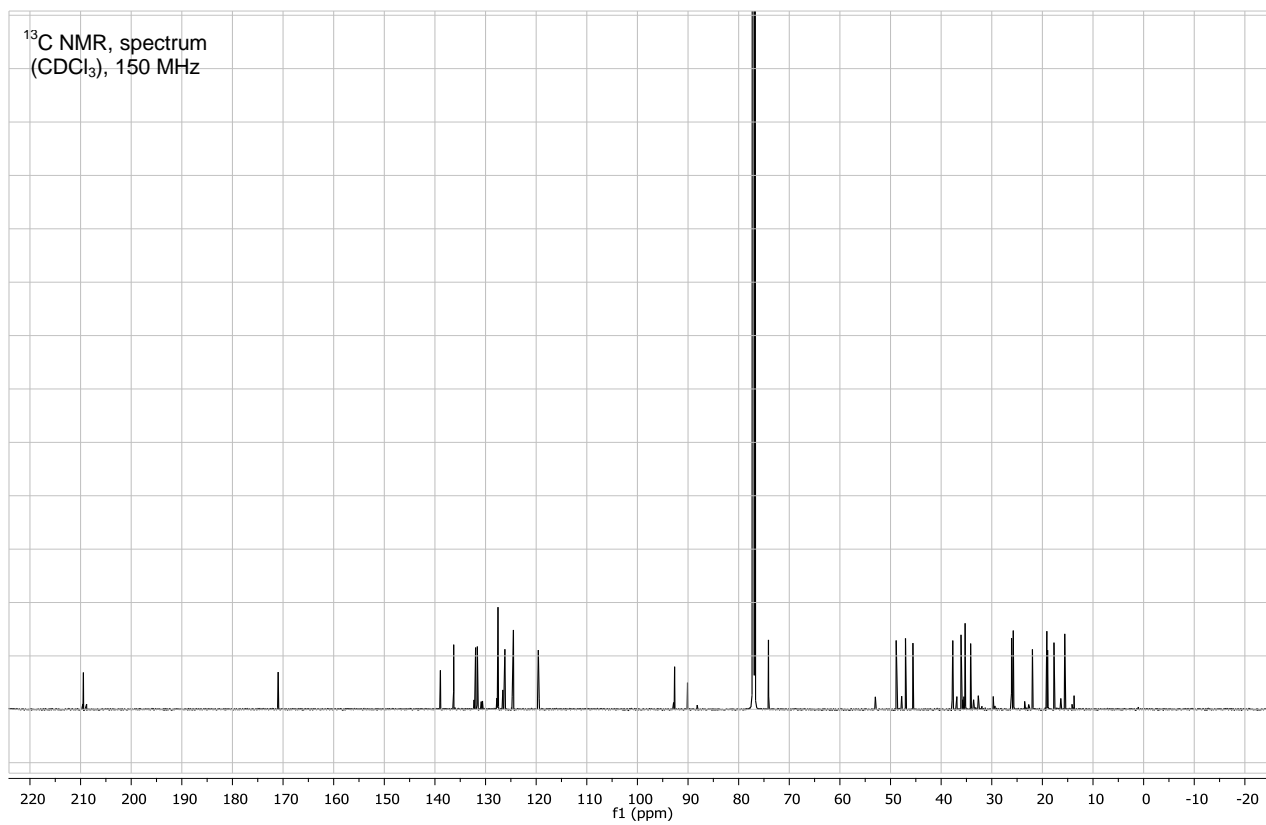

$^1\text{H}$ - $^1\text{H}$  COSY NMR, spectrum  
( $\text{CDCl}_3$ ), 600 MHz

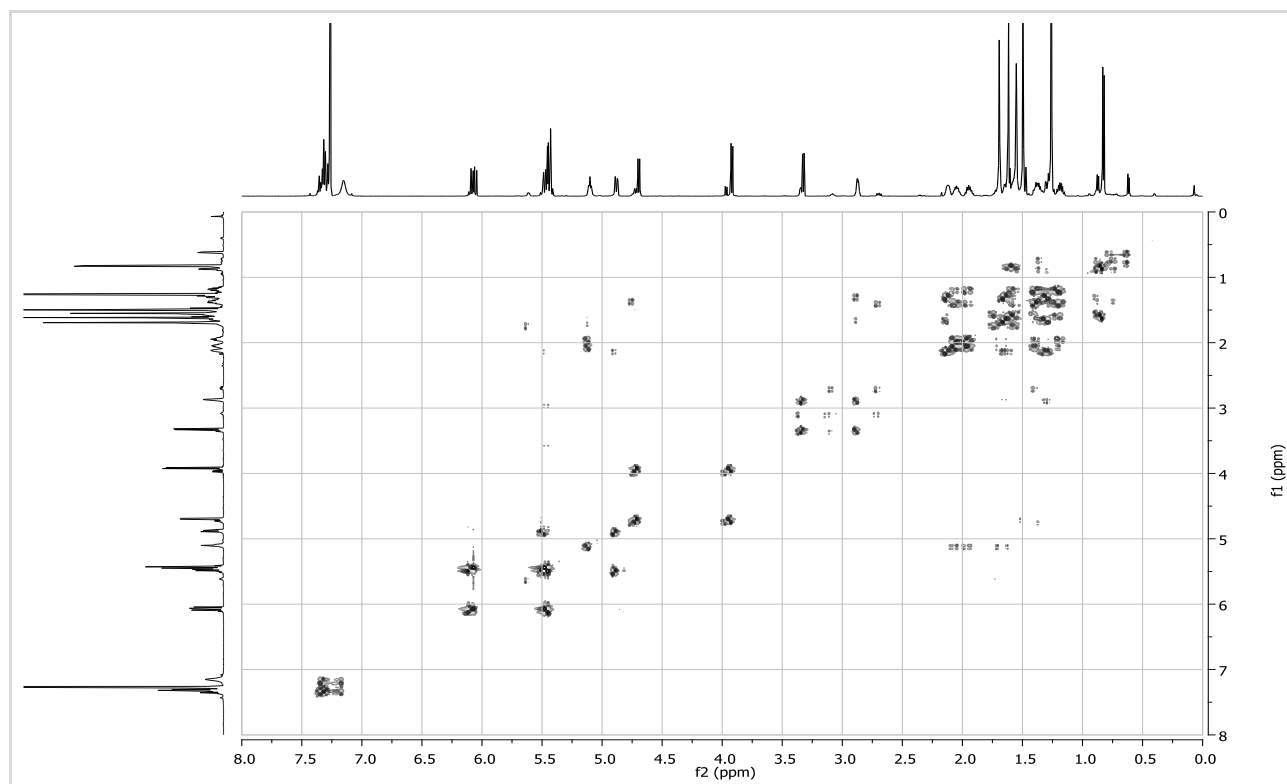

HMQC NMR, spectrum  
( $\text{CDCl}_3$ ), 600 MHz

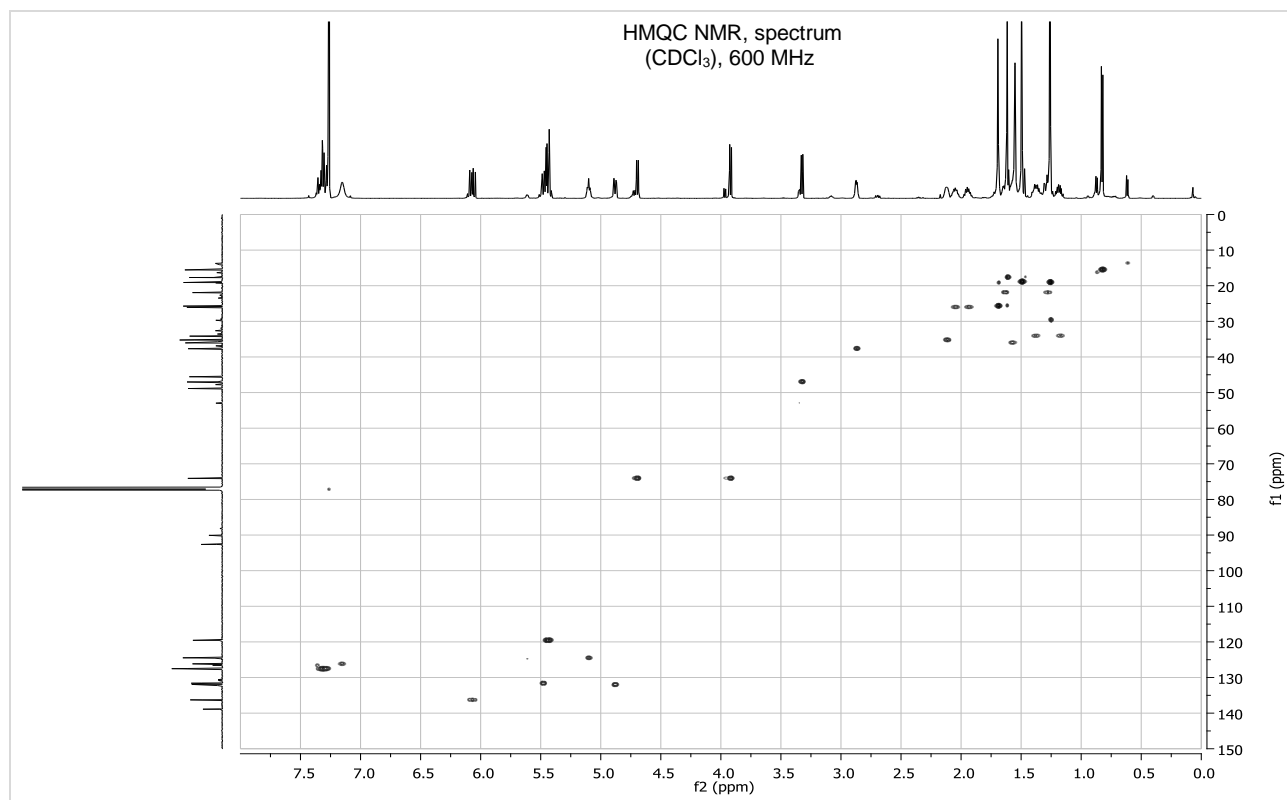

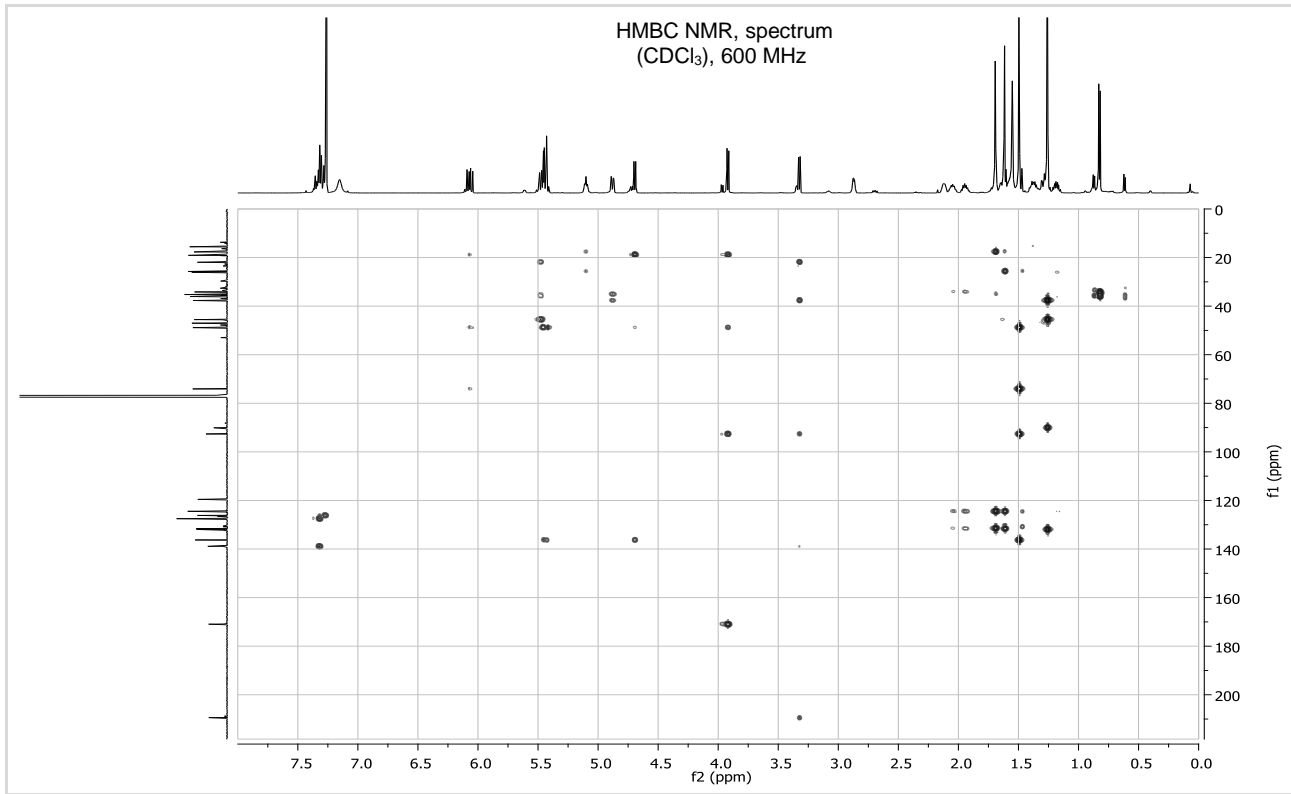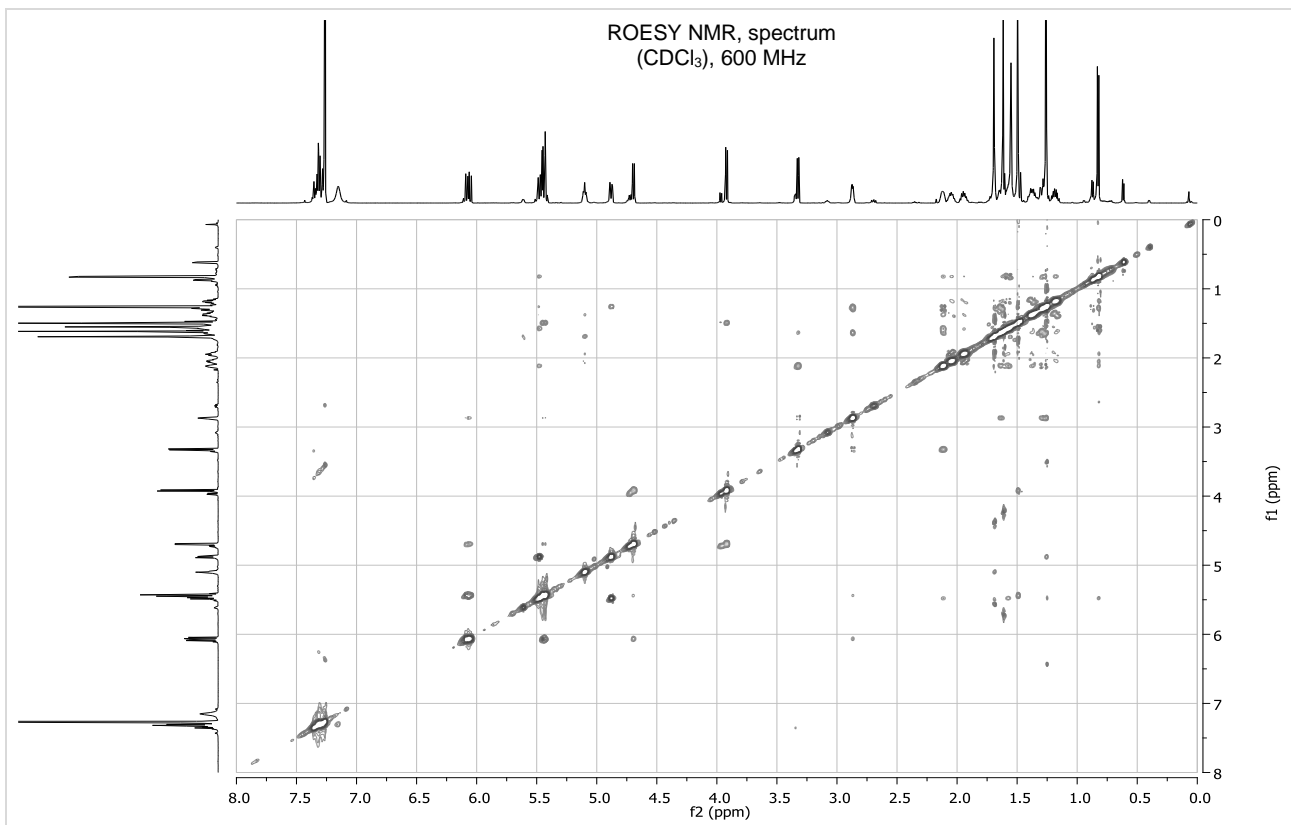

Supplement: NIHMS260112-supplement-SI.pdf [file NIHMS260112-supplement-SI.pdf]
